# Supplementary material for: Physiotherapy exercise rehabilitation with tailored exercise adherence support for people with osteoporosis and vertebral fractures: protocol for a randomised controlled trial – the OsteoPorosis Tailored exercise adherence INtervention (OPTIN) study
Source: PubMed Central journal article supplement — BMJ Open. 2022 Sep 16;12(9):e064637. doi: 10.1136/bmjopen-2022-064637 (PMC9486291; doi:10.1136/bmjopen-2022-064637), 2022-09-16
Supplement: bmjopen-2022-064637.draft_revisions.pdf [file bmjopen-2022-064637.draft_revisions.pdf]

# BMJ Open

BMJ Open is committed to open peer review. As part of this commitment we make the peer review history of every article we publish publicly available.

When an article is published we post the peer reviewers' comments and the authors' responses online. We also post the versions of the paper that were used during peer review. These are the versions that the peer review comments apply to.

The versions of the paper that follow are the versions that were submitted during the peer review process. They are not the versions of record or the final published versions. They should not be cited or distributed as the published version of this manuscript.

BMJ Open is an open access journal and the full, final, typeset and author-corrected version of record of the manuscript is available on our site with no access controls, subscription charges or pay-per-view fees (<http://bmjopen.bmj.com>).

If you have any questions on BMJ Open's open peer review process please email [info.bmjopen@bmj.com](mailto:info.bmjopen@bmj.com)

# BMJ Open

**Physiotherapy exercise rehabilitation with tailored exercise adherence support for people with osteoporosis and vertebral fractures: Protocol for a randomised controlled trial – the Osteoporosis Tailored exercise adherence intervention (OPTIN) study.**

|                               |                                                                                                                                                                                                                                                                                                                                                                                                                                                                                                                                               |
|-------------------------------|-----------------------------------------------------------------------------------------------------------------------------------------------------------------------------------------------------------------------------------------------------------------------------------------------------------------------------------------------------------------------------------------------------------------------------------------------------------------------------------------------------------------------------------------------|
| Journal:                      | <i>BMJ Open</i>                                                                                                                                                                                                                                                                                                                                                                                                                                                                                                                               |
| Manuscript ID                 | bmjopen-2022-064637                                                                                                                                                                                                                                                                                                                                                                                                                                                                                                                           |
| Article Type:                 | Protocol                                                                                                                                                                                                                                                                                                                                                                                                                                                                                                                                      |
| Date Submitted by the Author: | 13-May-2022                                                                                                                                                                                                                                                                                                                                                                                                                                                                                                                                   |
| Complete List of Authors:     | Barker, Karen L.; University of Oxford, Nuffield Department of Orthopaedics, Rheumatology and Musculoskeletal Sciences Room, Jonathan; Oxford University Hospitals NHS Foundation Trust, Physiotherapy Research Unit<br>Knight, Ruth; University of Oxford, Nuffield Department of Orthopaedics, Rheumatology and Musculoskeletal Sciences<br>Hannink, Erin; Oxford University Hospitals NHS Foundation Trust, Physiotherapy Research Unit<br>Newman, Meredith; Oxford University Hospitals NHS Foundation Trust, Physiotherapy Research Unit |
| Keywords:                     | Back pain < ORTHOPAEDIC & TRAUMA SURGERY, RHEUMATOLOGY, REHABILITATION MEDICINE                                                                                                                                                                                                                                                                                                                                                                                                                                                               |
|                               |                                                                                                                                                                                                                                                                                                                                                                                                                                                                                                                                               |

SCHOLARONE™  
Manuscripts

1  
2  
3  
4 1 Physiotherapy exercise rehabilitation with tailored exercise adherence support for people with  
5 osteoporosis and vertebral fractures: Protocol for a randomised controlled trial – the Osteoporosis  
6 2 osteoporosis and vertebral fractures: Protocol for a randomised controlled trial – the Osteoporosis  
7 3 Tailored exercise adherence intervention (OPTIN) study.

8  
9  
10 4 Authors: Karen L Barker 1,2 \*, Jonathan Room 1, Ruth Knight 3, Erin Hannink 1, Meredith  
11 5 Newman 1.

12  
13  
14  
15 6 1. Physiotherapy Research Unit, Nuffield Orthopaedic Centre, Oxford University  
16 7 Hospitals Foundation Trust, Oxford, OX3 7HE, UK.

17  
18  
19 8 2. Nuffield Department of Orthopaedics, Rheumatology and Musculoskeletal Sciences,  
20 9 University of Oxford, OX3 7LD.

21  
22  
23  
24 10 3. Oxford Clinical Trials Research Unit (OCTRU), Centre for Statistics in Medicine,  
25 11 Nuffield Department of Orthopaedics, Rheumatology and Musculoskeletal Sciences,  
26 12 University of Oxford, Oxford, UK.

27  
28  
29  
30 13 Authors: job title and affiliations

31  
32  
33 14 Karen L Barker, Professor of Physiotherapy 1,2\*, ORCID 0000-0001-9363-0383

34  
35  
36 15 Jonathan Room, Research Physiotherapist1, ORCID 0000-0002-1257-834X

37  
38  
39 16 Ruth Knight, Senior Medical Statistician 3, ORCID 0000-0001-6810-2845

40  
41  
42 17 Erin Hannink, Research Physiotherapist 1. ORCID 0000-0002-1422-4625

43  
44  
45 18 Meredith Newman, Research Physiotherapist 1 ORCID 0000-0002-7228-2022

46  
47  
48 19 \* Please direct correspondence to:

49  
50  
51 20 Professor Karen Barker

52  
53  
54 21 Physiotherapy Research Unit, Nuffield Orthopaedic Centre, Oxford University Hospitals NHS  
55 22 Foundation Trust, Windmill Road, Oxford, OX3 7LD, UK.

56  
57  
58 23 [Karen.barker@ouh.nhs.uk](mailto:Karen.barker@ouh.nhs.uk)

59  
60  
24 Keywords

1  
2  
3  
4  
5  
6  
7  
8  
9  
10  
11  
12  
13  
14  
15  
16  
17  
18  
19  
20  
21  
22  
23  
24  
25  
26  
27  
28  
29  
30  
31  
32  
33  
34  
35  
36  
37  
38  
39  
40  
41  
42  
43  
44  
45  
46  
47  
48  
49  
50  
51  
52  
53  
54  
55  
56  
57  
58  
59  
60

1 Physical therapy modalities; exercise, osteoporosis, spine, rehabilitation

2 Word count 3967

3

For peer review only

## 1 ABSTRACT

2 **Introduction:** Vertebral fragility fractures affect at least 20% of the older population in the  
3 UK. Best practice guidelines recommend the use of exercise to slow the rate of bone loss, to  
4 maintain muscle strength and physical function, and to prevent falls and further fractures.  
5 However, treatment effects are often small and difficult to sustain and adherence, or the  
6 extent to which patients engage in treatment, has been identified as an important issue by  
7 many studies. Our hypothesis is that integrating adherence intervention strategies with an  
8 exercise intervention will be beneficial. We will compare physiotherapy exercise  
9 rehabilitation with adherence support versus physiotherapy exercise rehabilitation alone in  
10 terms of effects on (a) physical function, quality of life, and fear of falling and (b) exercise  
11 self-efficacy and adherence.

12 **Methods and Analysis:** A multicentre, two-arm, parallel group, superiority randomised  
13 controlled trial (RCT) with blinded assessments at baseline (0) and 4, 8, and 12 months, with  
14 a nested qualitative study and health economic analysis. 116 participants will be allocated to  
15 either (i) out-patient physiotherapy which will include a musculoskeletal assessment and  
16 treatment including balance, posture, strength training and low impact weight-bearing  
17 exercises over 16 weeks; or (ii) Opt-In intervention. This includes standard physiotherapy as  
18 above plus an additional, integrated assessment interview (30mins) and 60 minutes of  
19 adherence support spread over the subsequent 16 weeks.

20 **Ethics and Dissemination:** The study protocol was approved by West of Scotland Research  
21 Ethics Committee 4 (21/WS/0071). Trial registration number ISRCTN 14465704. The paper is  
22 based on Protocol v4.

### 24 **Strengths and Limitations of this study**

- 25 • The Physiotherapy exercise rehabilitation with tailored exercise adherence support for  
26 people with osteoporosis and vertebral fractures (Opt-In) study is a multicentre randomised  
27 controlled trial with an embedded qualitative study and economic evaluation.
- 28 • It will recruit from at least six NHS hospitals.
- 29 • The intervention addresses adherence which is an important confounder in many trials of  
30 physiotherapy.

- 1  
2  
3  
4  
5  
6  
7  
8  
9  
10  
11  
12  
13  
14  
15  
16  
17  
18  
19  
20  
21  
22  
23  
24  
25  
26  
27  
28  
29  
30  
31  
32  
33  
34  
35  
36  
37  
38  
39  
40  
41  
42  
43  
44  
45  
46  
47  
48  
49  
50  
51  
52  
53  
54  
55  
56  
57  
58  
59  
60
- 1 • The intervention was developed using current research evidence, input from expert  
2 clinicians, researchers and patient / public representatives.
  - 3 • Due to the nature of the interventions the physiotherapists delivering the treatments and  
4 the participants cannot be blinded.

For peer review only

## 1 Introduction

2 Vertebral fragility fractures (VFFs) affect at least 20% of the older population in the UK and present a  
3 significant health and economic burden [1, 2]. They are associated with back pain, fatigue, low  
4 mood, restrictions in physical function and activities of daily living, and marked, persistent  
5 reductions in quality of life (QoL) [1, 2]. Without treatment, progression and functional decline are  
6 expected. Conservative treatment for osteoporosis includes bone protective medications and  
7 lifestyle adaptations. Guidelines recommend people with osteoporosis keep active and exercise to  
8 slow the rate of bone loss, to maintain muscle strength and physical function and to prevent falls  
9 and further fractures [3]. Exercise prescription with multi-component exercise programmes that  
10 include postural, balance, aerobic weight-bearing and strength exercises are recommended [1-3].

11 Trials evaluating exercise in people with VFFs have reported benefits across a range of outcomes [1,  
12 2, 4-10], with a recent Cochrane review concluding there is moderate-quality evidence that exercise  
13 improves physical function [1]. However, treatment effects are often small and difficult to sustain  
14 [1, 2, 4-10]. For example, in the PROVE trial, significant, clinically relevant benefits to back muscle  
15 endurance, balance, walking capacity and physical function following physiotherapy exercise at 4  
16 months post-randomisation did not persist at 12 months [2]. Adherence, or the extent to which  
17 patients engage in treatment, has been identified as an important issue by many studies [1, 2, 4-6,  
18 9]. Partial adherence or non-adherence is associated with worse outcomes and conversely, higher  
19 adherence with better outcomes [1, 2, 4-10].

20 Multiple factors affect exercise adherence in older people with chronic health conditions including  
21 osteoporosis [11, 12]. These include low exercise self-efficacy, low motivation, depression,  
22 insufficient exercise knowledge or skill, physical ability, negative views about treatment and exercise  
23 programme design [11,12]. Considering this complexity, interventions to support adherence that  
24 recognize personal barriers and facilitators to exercise and that can draw upon multiple adherence  
25 techniques are recommended [12, 13].

1  
2  
3 1 Behavioural approaches can include interventions that support exercise through providing additional  
4  
5 2 monitoring, interventions that aim to alter thinking patterns that contribute to non-adherence and  
6  
7 3 ones that strengthen behaviours that support adherence [12]. Motivational interviewing is a  
8  
9 4 collaborative process that explores potential ambivalence, obstacles and facilitators surrounding  
10  
11 5 behaviour change [6]. There is evidence that additional monitoring, prompts and feedback can  
12  
13 6 benefit adherence in older adults e.g., via telephone call/ text messages, wearable activity monitors  
14  
15 7 or by enriching environmental cues [1]. Incorporating exercise into everyday routines can make it  
16  
17 8 easier to initiate and sustain and creating 'Exercise Action Plans' that specify when, where and how  
18  
19 9 exercises are undertaken can support this process [1, 13]. Using an intervention mapping approach,  
20  
21 10 we developed an exercise adherence intervention underpinned theoretically by the COM-B  
22  
23 11 behaviour change model [14, 15].  
24  
25  
26  
27  
28

## 29 12 **Aims**

30  
31  
32 13 The aims of this study are:

- 33  
34  
35 14 • To compare physiotherapy exercise rehabilitation with adherence support with  
36  
37 15 physiotherapy exercise rehabilitation alone in terms of effects on: (a) physical function,  
38  
39 16 quality of life, and fear of falling and (b) exercise self-efficacy and adherence.  
40  
41 17 • To explore patient and physiotherapist views of the intervention and of adhering to exercise.  
42  
43 18 • To understand if physiotherapy exercise rehabilitation with adherence support is cost-  
44  
45 19 effective.  
46  
47  
48

## 49 20 **METHODS AND ANALYSES**

### 50 51 52 21 Study design

53  
54  
55 22 A multicentre, two-arm, parallel group, superiority randomised controlled trial (RCT) with blinded  
56  
57 23 assessments at baseline (0) and 4, 8, and 12 months following randomisation, with a nested  
58  
59 24 qualitative study and health economic analysis. Participants will be allocated to either (i) outpatient  
60



1  
2  
3 1 physiotherapy which will include a musculoskeletal assessment and 6 treatment sessions over 16  
4  
5 2 weeks based on the current best practice guidance from the Royal Osteoporosis Society; or (ii) the  
6  
7 3 Opt-In intervention. This includes outpatient physiotherapy as described above, plus an additional,  
8  
9  
10 4 integrated assessment interview (30mins) and 60 minutes of adherence support spread over the  
11  
12 5 subsequent treatment period of 16 weeks as prescribed by the physiotherapist in collaboration with  
13  
14 6 the participant. Sessions in both arms can be in-person or virtually via video-call/ telephone as  
15  
16 7 agreed between participant and therapist (**Figure 1**).

#### 18 19 20 8 Setting

21  
22  
23 9 At least six National Health Service (NHS) hospitals and their related physiotherapy services.

#### 24 25 26 10 Study Participants

27  
28  
29 11 Adults aged 55 years or over who have a diagnosis of at least one previous osteoporotic vertebral  
30  
31 12 fracture and back pain.

#### 32 33 34 13 Eligibility

##### 35 36 37 14 Inclusion Criteria

38  
39  
40 15 Participants may enter the study if they meet ALL the following criteria:

- 41  
42  
43 16 • Men and women  $\geq 55$  years: all women must be at least 1 year post-menopausal.
- 44  
45  
46 17 • One or more VFFs confirmed by radiography, X-Ray, MRI, CT or DEXA scan, people with VFF  
47  
48 18 of any severity and at any time-point post-fracture are eligible.
- 49  
50  
51 19 • They must have had an episode of back pain in the previous 12 months.
- 52  
53  
54 20 • All must be able to walk at least 10 metres independently with or without a walking aid.

##### 55 56 57 21 Exclusion Criteria

58  
59  
60

1 Participants may not enter the study if ANY of the following apply:

- 2 • Current conditions that would make participating in physiotherapy or exercise unsafe or  
3 confound results. This includes those with significant neurological and psychiatric conditions,  
4 severe unstable cardiovascular or pulmonary disease.
- 5 • Bone loss secondary to other metabolic disorders, diseases or medication e.g., rheumatoid  
6 arthritis, anorexia, cancer, coeliac disease, steroid use.
- 7 • Individuals whose primary problem is back pain that involves pain radiating into the lower  
8 limbs.
- 9 • Vertebroplasty, facet joint injection or physiotherapy within past 12 weeks.

#### 10 Recruitment

11 A member of the patient's direct care team will identify potential participants with VFFs via clinic  
12 lists and electronic medical records from relevant metabolic bone clinics, radiology clinics (DEXA),  
13 physiotherapy referral lists, and from Rheumatology clinics.

#### 14 Screening and eligibility assessment

15 Potential participants, who respond to an invitation letter will be contacted by telephone to discuss  
16 the study further, to check eligibility and to answer any questions. Patients who do not meet the  
17 eligibility criteria or who do not wish to participate will receive standard NHS treatment. We will  
18 record the age and gender of these patients to assess the generalisability of those recruited.

#### 19 Consent

20 Participants who are eligible and willing to proceed will be approached for informed consent.; they  
21 and the researcher will sign and date a consent form. For participants who are recruited to the  
22 additional nested qualitative study and interviewed on-line or via telephone, informed consent will

1  
2  
3 1 be obtained verbally before the interview. The researcher taking consent will read, and fill out, the  
4  
5 2 consent form on behalf of the participant and then sign the form.  
6  
7  
8  
9 3

#### 10 11 4 Randomisation 12 13

14 5 Consented participants will be randomised 1:1 using a computer-generated randomisation schedule  
15  
16 6 prepared by the trial statistician (RK). Individual randomisation will be stratified by recruitment  
17  
18 7 centre and permuted blocks of varying undisclosed sizes will be used. The randomisation schedule  
19  
20 8 will be concealed in sequentially numbered, opaque, sealed envelopes for each site. A study  
21  
22 9 administrator who has no interaction with blinded study staff will manage these envelopes. The  
23  
24 10 administrator will open the randomisation envelope, and then communicate with the local site who  
25  
26 11 will make the participant aware of their allocated group and refer for physiotherapy; making sure  
27  
28 12 that participants are allocated to physiotherapists delivering the treatment for their allocated arm.  
29  
30  
31

#### 32 33 13 Blinding 34 35

36 14 Physiotherapists delivering the interventions and participants will be told the treatment allocation.  
37  
38 15 Initial baseline assessment will occur prior to randomisation and the researcher undertaking  
39  
40 16 assessments will not be involved in any part of the randomisation procedure to ensure that they are  
41  
42 17 not able to bias the group allocation. The researcher conducting follow-up measures and the  
43  
44 18 research team personnel entering data will also not be informed of allocated group and participants  
45  
46 19 will be asked and reminded not to disclose their treatment group to the researcher at follow-up  
47  
48 20 appointments.  
49  
50  
51

#### 52 53 21 Interventions 54 55

#### 56 22 Training and monitoring 57 58 59 60

1  
2  
3 1 Sessions in both arms can be delivered in-person or virtually via video-call/ telephone as agreed  
4  
5 2 between participant and therapist; to allow flexibility and resilience as COVID restrictions on physical  
6  
7 3 attendance vary. Treatments were standardised and manualised and the study team provided  
8  
9 4 training in the multi-component exercise therapy treatments (delivered to all participants) to all  
10  
11 5 treating physiotherapists. Training in the behavioural adherence support intervention which  
12  
13 6 comprised assessment and a set of 9 behavioural interventions (the Opt-In toolkit) was delivered  
14  
15 7 separately to the therapists in the Opt-In arm. Treating physiotherapists will record the delivery and  
16  
17 8 content of each treatment session in adherence logs for each participant. Regular site visits will be  
18  
19 9 carried out to monitor intervention fidelity.  
20  
21  
22  
23

#### 24 10 Standard Care

25  
26  
27 11 Participants will be offered a 1-hour physiotherapy assessment and six individual outpatient  
28  
29 12 physiotherapy sessions spread over 16 weeks [2]. The physiotherapy will include a musculoskeletal  
30  
31 13 assessment and treatment including a multi-component, progressed balance, posture, strength  
32  
33 14 training and low impact weight-bearing exercise [3]. Exercise intensity will be assessed using the 10-  
34  
35 15 point Rating of Perceived Exertion scale (CR10-RPE), so participants work a moderately hard to hard  
36  
37 16 (RPE 4-6) intensity. Although current practice may vary, the package agreed as the standard care is  
38  
39 17 based on consensus, best practice guidelines and successful delivery in the PROVE trial exercise arm  
40  
41 18 [2] and aims to be a credible representation of current best practice treatment across the NHS.  
42  
43 19 Treating therapists will receive prior training on prescription of the exercises [2].  
44  
45  
46  
47

#### 48 20 Opt -In

49  
50  
51 21 Participants allocated to Opt-In will receive the standard package described above, plus an  
52  
53 22 additional, integrated assessment interview (30mins) and 60 minutes of adherence support spread  
54  
55 23 over the subsequent treatment period of 16 weeks in an individualised pattern as required by the  
56  
57 24 participant.  
58  
59  
60

1  
2  
3 1 Participants in the Opt-In arm will complete the Personalized Exercise Questionnaire (PEQ). The PEQ  
4  
5 2 was developed in Canada to support patient-centred exercise prescription for people with  
6  
7 3 osteoporosis and covers topics such as barriers to exercise and goals of treatment [16]. Treating  
8  
9 4 physiotherapists will have a collaborative discussion with the participant using a motivational  
10  
11 5 interviewing approach drawing upon PEQ responses and considering goals, motivators, facilitators,  
12  
13 6 and barriers surrounding exercise. It aims to provide physiotherapists with a deeper understanding  
14  
15 7 of patient motivations and circumstances, to strengthen the therapeutic alliance and the patient's  
16  
17 8 own motivations for adopting exercise [12]. Using their assessment findings, the questionnaire and  
18  
19 9 collaborative interview the physiotherapist will assess a participant's exercise capability (C),  
20  
21 10 opportunity (O) and motivation (M) to carry out exercise behaviour and select an adherence  
22  
23 11 technique from the Opt-In toolkit in response [14]. Techniques can include education about  
24  
25 12 osteoporosis and exercises, education about and practice of fall prevention strategies, , Exercise  
26  
27 13 Action Plans, , a contact telephone call, and self-monitoring and feedback strategies such as,  
28  
29 14 exercise confidence rating scales or using an exercise diary. Techniques are linked to COM-B  
30  
31 15 domains to facilitate physiotherapist decision-making e.g., Education improves capability and  
32  
33 16 motivation (C, M) and a diagrammatic decision aid was developed to facilitate rapid decision-making  
34  
35 17 during treatment. Each Opt-In arm treating physiotherapist received a toolkit and training by the  
36  
37 18 study team about techniques and how to use them. Physiotherapists were asked to prescribe at  
38  
39 19 least 3 adherence techniques from the Opt-In toolkit over 16 weeks but could use more, the exact  
40  
41 20 techniques selected were personalised to the patient as was the pattern and spread of the 60-  
42  
43 21 minute adherence support time. Participants in the intervention arm were given a folder that  
44  
45 22 included their exercises and selected adherence materials e.g., exercise diary, education leaflet,  
46  
47 23 action plan record.

48  
49  
50  
51  
52  
53  
54  
55  
56  
57  
58 25 Concomitant care  
59  
60

1  
2  
3 1 Other aspects of health and social care will continue as usual. Analgesia and other medication use  
4  
5 2 will be collected by self-report diary. Additional treatments sourced outside of the trial including  
6  
7 3 contact with general practitioners and other health care professionals will be recorded in self-report  
8  
9 4 health utilisation diaries in which participants will asked to record their use of health and social care  
10  
11 5 across the study e.g., GP, nurse, other physio, hospital admissions, home carer visits in standardised  
12  
13 6 study diaries. Diaries will be from 0-4, 4 to 8 and 8 to 12 months [17].  
14  
15  
16

### 17 Outcome Measures

18  
19  
20 8 The primary outcome measure will be the Timed Up and Go (TUG) at 12 months. The TUG is a test of  
21  
22 9 balance, lower limb strength and walking ability with established reliability and validity. It records  
23  
24 10 the time a person takes to stand up from a chair, walk 3 metres at a self-selected speed, turn and  
25  
26 11 walk back and sit down [18].  
27  
28  
29

30 12 Secondary outcome measures are:  
31  
32

- 33 13 • QUALEFFO 41: a disease specific measure of health-related quality of life (QoL) applicable to  
34  
35 14 patients with osteoporosis and vertebral fractures. It is a self-administered questionnaire  
36  
37 15 that provides scores on five domains: pain, physical function, social function, general health  
38  
39 16 perception, mental performance, and a total score. [19].  
40  
41  
42  
43 17
- 44  
45  
46 18 • Timed Loaded Standing (TLS): an assessment of shoulder and back muscle endurance for  
47  
48 19 people with VFF(s). [20].  
49  
50  
51  
52 20
- 53  
54  
55 21 • Thoracic kyphosis angle: measured non-radiographically using a flexicurve ruler, allowing an  
56  
57 22 angle of kyphosis to be calculated which is approximated to radiological measures of  
58  
59 23 kyphosis (Cobb angle) using a standardised formula [21].  
60

1  
2  
3  
4  
5  
6  
7  
8  
9  
10  
11  
12  
13  
14  
15  
16  
17  
18  
19  
20  
21  
22  
23  
24  
25  
26  
27  
28  
29  
30  
31  
32  
33  
34  
35  
36  
37  
38  
39  
40  
41  
42  
43  
44  
45  
46  
47  
48  
49  
50  
51  
52  
53  
54  
55  
56  
57  
58  
59  
60

1  
2  
3  
4  
5  
6  
7  
8  
9  
10  
11  
12  
13  
14  
15  
16  
17  
18  
19  
20  
21  
22  
23  
24  
25  
26  
27  
28  
29  
30  
31  
32  
33  
34  
35  
36  
37  
38  
39  
40  
41  
42  
43  
44  
45  
46  
47  
48  
49  
50  
51  
52  
53  
54  
55  
56  
57  
58  
59  
60

- Back pain: measured with a 10-point Numeric Pain Rating Scale (NPRS): [2].
- Functional Reach (FR) test: a measure of dynamic standing balance developed for older adults. The test has been used in people with VFF and performance is predictive of falls risk [22].
- Six-minute walk (6MW) test: a measure of functional walking capacity and aerobic cardio-respiratory fitness [23].
- Falls Efficacy Scale International (FES-I): a 16 item (3 minute) self-report measure of fear or concern about falling during activities. [24].
- Grip Strength: is the maximum force the hand and forearm muscles can generate measured with an isometric hand dynamometer in kilograms; maximum strength is the mean of three trials (3 seconds each) and measured for both hands [25].
- Self-efficacy for exercise (SEE) scale: a brief (<5 minute) 9-item scale that asks participants to rate how confident they would be that they would engage in exercise on a 10-point scale (not confident to very confident) under different situations e.g., if they were tired. SEE ratings are predictive of exercise behaviour [26].
- Adherence. This will be measured in two ways

- 1  
2  
3 1 a. Attendance records via clinician completed treatment logs, including a checkbox to log  
4  
5 2 whether adherence techniques have been prescribed (intervention group only).  
6  
7  
8 3 b. Exercise adherence rating scale (EARS): a brief 6-item scale that asks participants to  
9  
10 4 describe how they do their recommended exercises on a 5-point scale [27].  
11  
12  
13  
14 5 • Falls: documented on the CRF and prospectively using participant completed event diaries.  
15  
16 6 These will be collected in blocks from 0-4 months, 4 to 8 months, and 8 to 12 months during  
17  
18 7 the study. Incidence and severity information will be recorded e.g., nature of the fall, its  
19  
20 8 outcome (no-harm, fracture etc) and any treatment required [2].  
21  
22  
23 9  
24  
25 10 • EQ-5D-5L is a short, generic measure of health related QoL and will be completed to assist  
26  
27 11 assessment of health economics [28].  
28  
29  
30 12  
31  
32  
33 13 • Global Rating Change (GRC) scale: a patient's perspective of change based on a 7-point  
34  
35 14 ordinal scale (much worse, moderately worse, a little worse, no change, a little better,  
36  
37 15 moderately better, much better) [29].  
38  
39  
40 16  
41  
42  
43 17 A summary of outcome measures and timepoints is shown in Table 1 (**Table 1**).  
44  
45 18  
46  
47  
48 19  
49  
50  
51  
52  
53  
54  
55  
56  
57  
58  
59  
60



1

| Time Point                | Measurement                     | Enrolment | allocation | Baseline | 4 months | 8 months | 12 months |
|---------------------------|---------------------------------|-----------|------------|----------|----------|----------|-----------|
| Screening Log             |                                 | X         |            |          |          |          |           |
| Eligibility confirmed     |                                 | x         |            |          |          |          |           |
| Informed Consent          |                                 | x         |            |          |          |          |           |
| Randomisation             |                                 |           | x          |          |          |          |           |
| Demographic               | Age, gender, weight, ethnicity, |           |            | x        |          |          |           |
| Primary OM                | Timed Up & Go                   |           |            | x        | x        | x        | x         |
| Quality of Life           | Qualeffo 41                     |           |            | X        | X        | X        | X         |
| Fear Falling              | FES-I                           |           |            | X        | X        | X        | X         |
| Back Pain Intensity       | NRS-P                           |           |            | X        | X        | X        | X         |
| Back strength / endurance | TLS                             |           |            | X        | X        | X        | X         |
| Walking                   | 6MWT                            |           |            | X        | X        | X        | X         |
| Balance                   | Functional Reach Test           |           |            | X        | X        | X        | X         |
| Kyphosis                  | Flexicurve                      |           |            | X        | X        | X        | X         |
| Exercise Self Efficacy    | SEE                             |           |            | X        | X        | X        | X         |
| Exercise adherence        | EARS                            |           |            | X        | X        | X        | X         |
| Exercise adherence        | Sessions attended               |           |            |          | x        | x        | x         |

2

3 Table 1: Time Points at which outcomes will be assessed.

4

5 Adverse events

6 Foreseeable adverse events (AE) occurring because of the trial interventions will be recorded.

7 Participants will receive information on potential AEs resulting from the exercises and what they

8 should do if they experience an AE, as would be part of standard NHS procedure. Adverse symptoms

9 in response to treatment and any adverse events will be monitored by clinicians regularly and in line

1  
2  
3 1 with local departmental procedures and captured on adverse event forms, and via questions on the  
4  
5 2 CRF.  
6  
7

8 3 A Serious AE (SAE) is any untoward medical occurrence related to the trial interventions that results  
9  
10 4 in death, is life-threatening, requires inpatient hospitalisation or prolongation of existing  
11  
12 5 hospitalisation, or results in persistent or significant disability/incapacity. SAEs are likely to be rare  
13  
14 6 and are unlikely to occur as a result of the exercise programmes delivered in this study.  
15  
16

17  
18 7 Any reports of SAE will be reported to the trial office within 24 hours of the local research team  
19  
20 8 becoming aware of the event. They will be reviewed by an independent medically qualified assessor  
21  
22 9 within 3 days.  
23  
24

## 25 26 10 Statistics and analysis

### 27 28 29 11 Sample Size

30  
31  
32 12 The primary outcome is the Timed Up & Go (TUG) test. This is the most widely used physical function  
33  
34 13 measure in RCTs of exercise for people with VFF [4]. The minimal clinically important difference  
35  
36 14 (MCID) for the TUG has not been established in people with VFF(s), but a MCID of 1.4s is reported for  
37  
38 15 similar older populations with chronic musculoskeletal disorders [30]. The study requires 104  
39  
40 16 participants (52 per arm) to be 80% powered to detect a 1.4s difference in TUG score between  
41  
42 17 groups at a 5% significance level (two-sided) assuming that the standard deviation is 2.5s. Similar  
43  
44 18 trials have had loss to follow-up rates of 10% at 12 months [2]. To account for this the sample size  
45  
46 19 has been inflated to 116 participants (58 per arm).  
47  
48  
49

### 50 51 20 Statistical Analysis

52  
53  
54 21 The study will be reported according to the Consolidated Standards of Reporting Trials (CONSORT)  
55  
56 22 2010 statement utilising the nonpharmacological and patient-reported outcome extensions [ 31,32].  
57  
58 23 Standard descriptive statistics will be used to describe the characteristics of the two groups at  
59  
60

1  
2  
3 1 baseline. Means and standard deviations (SDs) or medians and interquartile ranges (IQRs) as  
4  
5 2 appropriate will be used for continuous variables, and numbers and percentages will be used for  
6  
7 3 binary and categorical variables.  
8  
9

10 4 Compliance with the intervention will be defined as participating in the extended interview and  
11  
12 5 prescription of at least 3 adherence support techniques. This will be recorded on treatment logs.  
13  
14

15 6 Details of the number of physiotherapy sessions attended will also be summarised by treatment  
16  
17 7 group. The number and proportion of participants who withdraw will be summarised along with  
18  
19 8 reasons for these. Deaths are not anticipated in this study, but details of any that do occur will also  
20  
21 9 be summarised by treatment arm.  
22  
23

24  
25 10 Summary statistics will be presented for all comparative outcomes, and effect estimates will be  
26  
27 11 reported together with 95% confidence intervals with all tests carried out at a 5% two-sided  
28  
29 12 significance level.  
30  
31

32 13 At 12 months post-randomisation the two treatment groups will be compared on the TUG measure  
33  
34 14 using a multivariate linear regression model adjusting for recruiting centre (stratification factor), age  
35  
36 15 and baseline TUG score. An unadjusted t-test will also be undertaken. The TUG is also recorded at 4,  
37  
38 16 and 8 months after randomisation, and an additional analysis utilising all time points, using multi-  
39  
40 17 level modelling and including a treatment by time interaction if appropriate will be undertaken. For  
41  
42 18 each of these models, the assumption of approximate normality will be assessed by examining the  
43  
44 19 residuals. If this assumption is not met the first approach will be to consider a transformation to  
45  
46 20 achieve normality. If this is not possible, the two groups will be compared using non-parametric  
47  
48 21 methods (e.g., Mann-Whitney U-test). This analysis will be unadjusted and will consider each time  
49  
50 22 point separately.  
51  
52

53  
54  
55 23 Similar analyses will be performed for secondary outcomes which can be considered approximately  
56  
57 24 continuous (QUALEFFO-41, FES-1, NPRS, TLS, Grip strength, 6MW, FRT, Thoracic kyphosis, SEE and  
58  
59  
60

1 EARS) at 4-, 8- and 12-months post-randomisation. The appropriateness of the assumption of  
2 approximate normality will also be considered and transformation to normality or non-parametric  
3 methods used as appropriate. It is not anticipated that the number of falls will be approximately  
4 normal, therefore, this will be summarised by treatment group using medians and IQRs and  
5 compared using non-parametric methods. The number and proportion of participants experiencing  
6 an AE during follow-up will be summarised by treatment group and a logistic regression model  
7 adjusted for recruiting centre will be used to compare the rates in the two groups. Severity of AEs  
8 will also be summarised by treatment group.

9 In addition, since previous work suggests that change in thoracic kyphosis at follow-up is closely  
10 related to baseline values, a subgroup analysis of thoracic kyphosis at follow-up will be completed  
11 dependent on whether the participant was kyphotic at baseline [33].

12 All analyses will be performed for the intention to treat (ITT) population. This will include all  
13 randomised participants with available data who will be analysed according to their allocated  
14 intervention regardless of the treatment they received.

15 In addition, analysis of the primary outcome (TUG at 12 months) will be repeated for the per  
16 protocol (PP) population which will include only those participants who received their allocated  
17 treatment. Participants with other major protocol deviations (e.g., recruited and later found to be  
18 ineligible) will also be excluded from this population.

### 21 Health Economic Analysis

22 The relative efficiency of the intervention will be assessed by within-trial cost-utility and cost-  
23 consequences analyses [34]. The evaluation will take an NHS and personal social services

1 perspective. Resource use for the delivery of Opt-In and at participant level will be combined with  
2 unit cost from standard national sources to estimate average total costs. We will estimate the  
3 incremental cost per QALY (from EQ-5D-5L) and present the different cost components and multiple  
4 benefits of Opt-In in a 'balance sheet' in the cost-consequences analysis.

#### 5 Embedded Qualitative study

6 As part of the main study a nested qualitative study will take place. The qualitative element of this  
7 study will involve a subset (12-15) of patients who undertake the Opt-In intervention who will be  
8 invited to take part in 4 short (15-20 minute) interviews about their experiences and views about  
9 exercise adherence and the adherence intervention at the following time points: i) following  
10 assessment ii) during treatment (after 3 sessions), iii) post-treatment (after 4 months), and iv) at 12  
11 months. The interviews may occur online via video-call or face-to-face in the person's home or at a  
12 local clinic, depending on participant preference. The interviews will be audio recorded and  
13 transcribed verbatim. Participants will be given an opportunity to check the interview transcript.

14 Focus groups will be conducted with physiotherapists who undertake the Opt-In intervention, asking  
15 them to share their views about promoting exercise adherence and the Opt-In intervention, these  
16 will be audio-recorded with a Dictaphone.

17 Purposive sampling will be used to achieve a sample which includes female and male patients,  
18 patients of varying activity levels and patients of different ages and disease severity (pain/ number  
19 of fractures). These factors may influence the ability to engage with an exercise programme. Since  
20 most research regarding adherence in osteoporosis has previously been undertaken with women, it  
21 also considered important to capture the views of male patients within the current study and to  
22 capture the experiences of people with differing physical activity levels prior to the programme. The  
23 quality of a qualitative study is not dependent on its sample size; however, the sample size needs to  
24 be sufficiently large to enable relevant data to be obtained, without being so overly large that

1 detailed analysis is subsequently prevented [35]. Information about physiotherapists views of  
2 delivering the adherence interventions will also be sought. All those who deliver the adherence  
3 techniques will be invited to participate in a focus group.

4 Audio recordings will be listened to, and transcripts read until they become familiar. Data from the  
5 interviews with physiotherapists and participants will be analysed separately to understand the  
6 perspectives of each group. We will use collaborative methods to ensure a strong voice from PPI  
7 members and research rigour. We will use thematic analysis, using the six steps proposed by Braun  
8 and Clarke [36].

### 9 Patient and Public Involvement

10 The study funding application, intervention development and study materials preparation were  
11 supported by our patient and public involvement members who will be involved across the course of  
12 the study.

### 13 ETHICS AND DISEMINATION.

14 The study protocol was approved by West of Scotland Research Ethics Committee 4 (Reference  
15 21/WS/0071). The University of Oxford is the sponsor. The trial is registered with the International  
16 Standard Randomised Controlled Trials database ISRCTN reference number 14465704.

17 The protocol has been reported following the Standard Protocol Items: Recommendations for  
18 Interventional Trials (SPIRIT) statement [37]. Results will be published reported following the  
19 Consolidated Standards of Reporting Trials (CONSORT) guidelines [38]. The Template for  
20 Intervention Description and Replication (TIDieR) statement will be used to report the intervention  
21 ensuring replication is possible [39]. Results will be published in a peer reviewed journal with  
22 authorship eligibility according to International Committee of Medical Journal Editors (ICJME)  
23 criteria. Participants will be asked if they wish to have the results shared with them prior to  
24 publication and we will share with those who request this.

1  
2  
3 1 TRIAL STATUS  
4  
5

6 2 The first patient was randomised to the trial on 1<sup>st</sup> September 2021. Recruitment is ongoing.  
7  
8

9 3 **Contributions of Authors:**  
10

11 4 Karen L Barker: Chief Investigator, Conceived and designed the study, was awarded the funding and  
12  
13 5 had overall responsibility for the study design and delivery and drafted the manuscript. She is the  
14  
15  
16 6 guarantor.

17  
18  
19 7 Jonathan Room: contributed to study design and provided specific content and edited manuscript.  
20  
21  
22 8 Qualitative lead.  
23

24  
25 9 Erin Hannink: contributed to study design and provided specific content and edited manuscript  
26

27  
28 10 Ruth Knight (statistical co-applicant) performed the sample size calculation, prepared randomisation  
29  
30 11 schedules, planned statistical analysis methods  
31

32  
33 12 Meredith Newman (Trial Manager), trial design, intervention development, manualisation, training,  
34  
35 13 supervision, writing and reviewing report.  
36  
37

38  
39 14 **Funding**  
40

41  
42 15 The study is supported by an independent grant from the Chartered Society of Physiotherapy  
43  
44 16 Charitable Trust (RP/19/01).  
45  
46

47 17 **Competing Interests**  
48

49  
50 18 All authors have completed the ICMJE uniform disclosure form at [www.icmje.org/coi\\_disclosure.pdf](http://www.icmje.org/coi_disclosure.pdf)  
51  
52 19 and declare: no support from any organisation for the submitted work, other than funding  
53  
54 20 arrangements for the trial described in body of the text; no financial relationships with any  
55  
56 21 organisations that might have an interest in the submitted work in the previous three years; no  
57  
58 22 other relationships or activities that could appear to have influenced the submitted work.  
59  
60

1  
2  
3 1 **Transparency**  
4  
5

6 2 The lead author (KLB) affirms that the manuscript is an honest, accurate and transparent account of  
7  
8 3 the study being reported.  
9  
10

11  
12 4

13  
14  
15 5 **References**  
16

- 17 6 1. Gibbs JC, MacIntyre NJ, Ponzano M, et al. Exercise for improving outcomes after  
18 7 osteoporotic vertebral fracture. *Cochrane Database Syst Rev*. 2019 Jul 5; 7:  
19 8 CD008618. doi: 10.1002/14651858.
- 20  
21 9 2. Barker K, Newman M, Stallard N, et al. Physiotherapy Rehabilitation for Osteoporotic  
22 10 Vertebral Fracture: A Randomised Controlled Trial and economic evaluation (PROVE  
23 11 Trial). *Osteoporos Int*, 2019 Nov 12.
- 24  
25 12 3. [https://www.bgs.org.uk/resources/strong-steady-straight-nos-exercise-and-](https://www.bgs.org.uk/resources/strong-steady-straight-nos-exercise-and-osteoporosis-consensus-statement)  
26 13 [osteoporosis-consensus-statement](https://www.bgs.org.uk/resources/strong-steady-straight-nos-exercise-and-osteoporosis-consensus-statement).
- 27  
28 14 4. Papaioannou A et al. Efficacy of home-based exercise for improving quality of life  
29 15 among elderly women with symptomatic osteoporosis-related vertebral fractures.  
30 16 *Osteoporos Int* 2003;14: 677–682.
- 31  
32 17  
33  
34 18 5. Gold DT, Shipp KM, Pieper CF, et al. Group treatment improves trunk strength and  
35 19 psychological status in older women with vertebral fractures: results of a RCT. *J Am*  
36 20 *Geriatr Soc* 2004; 52:1471–1478.
- 37  
38 21  
39  
40 22 6. Bergström I et al. Back extensor training increases muscle strength in  
41 23 postmenopausal women with osteoporosis, kyphosis and vertebral fractures. *Adv*  
42 24 *Physiother* 2011; 13:110–117.
- 43  
44 25  
45  
46 26 7. Bergland A. et al. Effect of exercise on mobility, balance, and health-related quality  
47 27 of life in osteoporotic women with a history of vertebral fracture: a randomized,  
48 28 controlled trial. *Osteoporos Int*. 2011; 22: 1863-71.
- 49  
50 29 8. Olsen CF, Bergland A. The effect of exercise and education on fear of falling in  
51 30 elderly women with osteoporosis and a history of vertebral fracture: results of a  
52 31 randomized controlled trial. *Osteoporos Int*. 2014; 2: 2017-25.
- 53  
54 32 9. Gibbs JC, McArthur C, Wark J et al. The effect home exercise in older women with  
55 33 vertebral fractures: A pilot randomised controlled trial. *Physical Therapy*. 3 Jan 2020  
56 34 doi.org/10.1093/ptj/pzz188  
57  
58  
59  
60



1  
2  
3  
4  
5  
6  
7  
8  
9  
10  
11  
12  
13  
14  
15  
16  
17  
18  
19  
20  
21  
22  
23  
24  
25  
26  
27  
28  
29  
30  
31  
32  
33  
34  
35  
36  
37  
38  
39  
40  
41  
42  
43  
44  
45  
46  
47  
48  
49  
50  
51  
52  
53  
54  
55  
56  
57  
58  
59  
60

10. Evstigneeva L, Lesnyak O, Bultink IEM et al Effect of a twelve-month physical exercise program of patients with osteoporotic vertebral fractures: a randomised controlled trial. *Osteoporos Int* 2016 27: 2515-24.
11. Room J, Hannink E, Dawes H, et al. What interventions are used to improve exercise adherence in older people and what behavioural techniques are they based on? *BMJ Open*. 2017; 7(12): e019221.
12. Beavious C. Motivational interviewing to improve treatment adherence. *Joint Bone Spine*. 2019 Feb 22: pii: S1297-319X(19)30042-9. doi: 10.1016/j.jbspin.2019.02.005.
13. NICE draft guidance on behaviour change URL: <https://www.nice.org.uk/guidance/ph49/documents/behaviour-change-draft-guidance2>(accessed 11th March 2020).
14. Room J, Boulton M, Dawes H, et al. Development of an exercise adherence intervention for older people. The steps taken designing a complex intervention for the AERO trial. *WCPT 2019: PO-J-09-SUN1*
15. Michie S, van Stralen M, West R. The behaviour change wheel: A new method for characterising and designing behaviour change interventions. *Implementation Science* 2011, 6:42.
16. Rodrigues IB, Jonathan D, Adachi JD, Beattie5 KA, MacDermid JC. Development and validation of a new tool to measure the facilitators, barriers and preferences to exercise in people with osteoporosis. *BMC Musculoskeletal Disorders* 2017 18:540. DOI 10.1186/s12891-017-1914-5.
17. Drummond M, Sculpher M, Torrance G, O'Brien B, Stoddart G. *Methods for the economic evaluation of health care programmes*: Oxford University Press; 2005.
18. Podsiadlo, D. and Richardson, S. (1991). "The timed "Up & Go": a test of basic functional mobility for frail elderly persons." *J Am Geriatr Soc* 39(2): 142-148.
19. International Osteoporosis Foundation Quality of life questionnaires QUALEFFO-41. URL: <https://www.osteoporosis.foundation/health-professionals/research-tools/quality-life-questionnaires> (accessed 30 March 2022).
20. Newman M, Newman R, Hughes T, Vadher K, Barker KL. Is the timed loaded standing test a valid measure of back muscle endurance in people with vertebral osteoporosis? *Osteoporos Int*. 2018; 29:893–905.
21. Greendale GA, Nili NS, Huang MH, Seeger L, Karlamangla AS. The reliability and validity of three non-radiological measures of thoracic kyphosis and their relations to the standing radiological Cobb angle. *Osteoporos Int* 2011; 22:1897–905.
22. Weiner DK, Duncan PW et al. Functional reach: a marker of physical frailty. *J Am Geriatr Soc* 1992; 40(3):203-7.
23. Steffen TM, Hacker TA, Mollinger L. Age- and gender-related test performance in community-dwelling elderly people: Six-Minute Walk Test, Berg Balance Scale, Timed Up and Go Test, and gait speeds. *Phys Ther* 2002;82:128–37.
24. Delbaere K, Close JCT et al. The falls efficacy scale international (FES-I). A comprehensive longitudinal validation study. *Age and Ageing* 2010; 39: 201-16.

- 1  
2  
3 1 25. Abizanda P, Navarro JL et al. Validity and usefulness of handheld- dynamometry for  
4 2 measuring muscle strength in community-dwelling older persons. Arch Gerontol  
5 3 Geriatr. 2012; 54(1): 21-7.  
6  
7 4 26. Resnick B and Jenkins LS. Testing the reliability and validity of the self-efficacy for  
8 5 exercise scale. Nurs Res 49 (3): 154-159.  
9  
10 6 27. Newman-Beinart NA et al. The development and initial psychometric evaluation of a  
11 7 measure assessing adherence to prescribed exercise: the Exercise Adherence Rating  
12 8 Scale (EARS). Physiotherapy 103 (2017) 180-85.  
13  
14 9 28. Herdman M, Gudex C, Lloyd A et al. Development and preliminary testing of the new  
15 10 five-level version of the EQ-5D-5L (EQ-5D-5L). Qual Life Res 2011; 20 (10): 1727-  
16 11 36.28.  
17  
18 12 29. Kamper SJ, Maher CG, Mackay G. Global rating of change scales: a review of  
19 13 strengths and weaknesses and considerations for design. J Man Manip Ther.  
20 14 2009;17(3):163-170.  
21  
22 15 30. Wright A, Cook C, Baxter G, et al. A comparison of 3 methodological approaches to  
23 16 defining major clinically important improvements of 4 performance measures in  
24 17 patients with hip osteoarthritis. J Orthop Sport Phys. 2011; 41: 319 -27.  
25  
26 18 31. Schulz KF, Altman DG, Moher D, for the CONSORT Group. CONSORT 2010 Statement:  
27 19 updated guidelines for reporting parallel group randomised trials. BMC Trials. 2010;  
28 20 11:32.  
29  
30 21 32. Calvert M, Blazeby J, Altman DG, et al. Reporting of patient-reported outcomes in  
31 22 randomised trials: the CONSORT PRO Extension. JAMA. 2013;309(8):814–22.  
32  
33 23 33. Hannink E, Newman M, Barker KL. Does thoracic kyphosis severity predict response  
34 24 to physiotherapy rehabilitation in patients with osteoporotic vertebral fracture? A  
35 25 secondary analysis of the PROVE RCT. Physiotherapy Feb 17, 2022,  
36  
37 26 34. Drummond M, Sculpher M, Torrance G, O'Brien B, Stoddart G. Methods for the  
38 27 economic evaluation of health care programmes: Oxford University Press; 2005.  
39  
40 28 35. Sandelowski, M., Sample size in qualitative research. Research in Nursing and  
41 29 Health, 1995. 18(2): p. 179-183.  
42  
43 30 36. Braun V, Clarke V. What can "thematic analysis" offer health and wellbeing  
44 31 researchers? Int J Qual Stud Health Well-being. 2014; 9:26152.  
45  
46 32 37. Chan A-W, Tetzlaff JM, Gotzsche PC et al. SPIRIT 2013 explanation and elaboration:  
47 33 guidance for protocols of clinical trials. BMJ 2013;346: e7586.  
48  
49 34 38. Schulz KF, Altman DG, Moher D et al. CONSORT 2010 statement: updated guidelines  
50 35 for reporting parallel group randomised trials. BMJ 2010;340:c332.  
51  
52 36 39. Hoffmann TC, Glasziou PP, Boutron I et al. Better reporting of interventions:  
53 37 template for intervention description and replication (TIDieR) checklist and guide.  
54 38 BMJ 2014; 348:g1687.  
55  
56 39  
57  
58  
59  
60

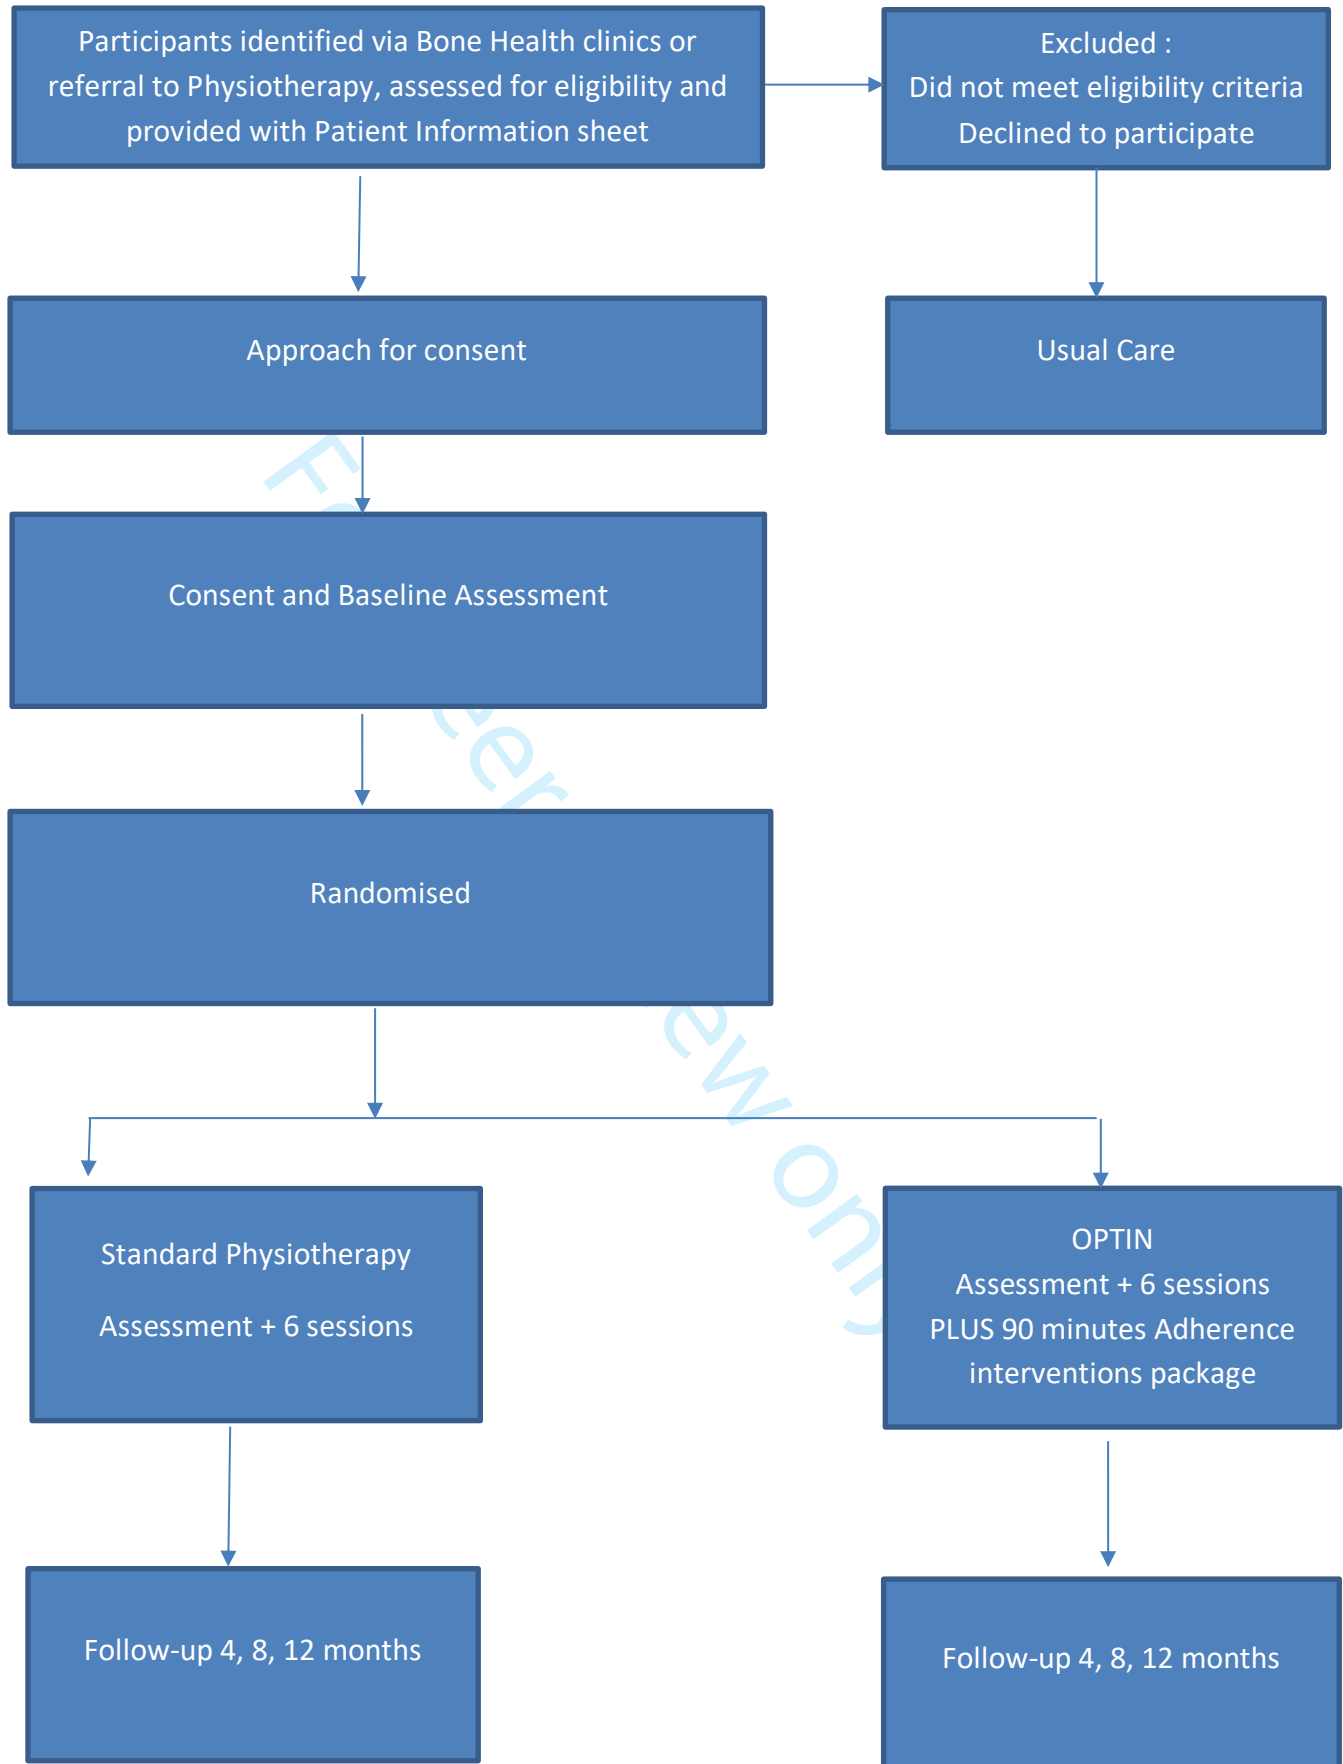

Qualitative Interviews n =15-20 participants  
Focus group Physiotherapists

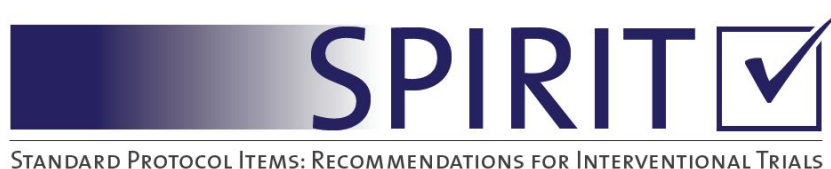

SPIRIT 2013 Checklist: Recommended items to address in a clinical trial protocol and related documents\*

| Section/item                      | Item No | Description                                                                                                                                                                                                                                                                              |
|-----------------------------------|---------|------------------------------------------------------------------------------------------------------------------------------------------------------------------------------------------------------------------------------------------------------------------------------------------|
| <b>Administrative information</b> |         |                                                                                                                                                                                                                                                                                          |
| Title                             | 1       | Descriptive title identifying the study design, population, interventions, and, if applicable, trial acronym <b>Title Page Lines 1-3</b>                                                                                                                                                 |
| Trial registration                | 2a      | Trial identifier and registry name. If not yet registered, name of intended registry <b>Page 3 Line 21</b>                                                                                                                                                                               |
|                                   | 2b      | All items from the World Health Organization Trial Registration Data Set                                                                                                                                                                                                                 |
| Protocol version                  | 3       | Date and version identifier <b>Page 3 Line 22</b>                                                                                                                                                                                                                                        |
| Funding                           | 4       | Sources and types of financial, material, and other support <b>Page 23 lines 9/10</b>                                                                                                                                                                                                    |
| Roles and responsibilities        | 5a      | Names, affiliations, and roles of protocol contributors <b>Title page and Page 22/23</b>                                                                                                                                                                                                 |
|                                   | 5b      | Name and contact information for the trial sponsor <b>Page 19 Line 12</b>                                                                                                                                                                                                                |
|                                   | 5c      | Role of study sponsor and funders, if any, in study design; collection, management, analysis, and interpretation of data; writing of the report; and the decision to submit the report for publication, including whether they will have ultimate authority over any of these activities |
|                                   | 5d      | Composition, roles, and responsibilities of the coordinating centre, steering committee, endpoint adjudication committee, data management team, and other individuals or groups overseeing the trial, if applicable (see Item 21a for data monitoring committee)                         |
| <b>Introduction</b>               |         |                                                                                                                                                                                                                                                                                          |
| Background and rationale          | 6a      | Description of research question and justification for undertaking the trial, including summary of relevant studies (published and unpublished) examining benefits and harms for each intervention <b>P5-6</b>                                                                           |
|                                   | 6b      | Explanation for choice of comparators <b>P6</b>                                                                                                                                                                                                                                          |
| Objectives                        | 7       | Specific objectives or hypotheses <b>P6</b>                                                                                                                                                                                                                                              |

1  
2 Trial design 8 Description of trial design including type of trial (eg, parallel group,  
3 crossover, factorial, single group), allocation ratio, and framework (eg,  
4 superiority, equivalence, noninferiority, exploratory) **P6 L22-3**  
5  
6  
7

8 **Methods: Participants, interventions, and outcomes**  
9

10 Study setting 9 Description of study settings (eg, community clinic, academic hospital)  
11 and list of countries where data will be collected. Reference to where  
12 list of study sites can be obtained **P7 L10**  
13

14 Eligibility criteria 10 Inclusion and exclusion criteria for participants. If applicable, eligibility  
15 criteria for study centres and individuals who will perform the  
16 interventions (eg, surgeons, psychotherapists) **P7-8**  
17  
18

19 Interventions 11a Interventions for each group with sufficient detail to allow replication,  
20 including how and when they will be administered **P10-11**  
21

22 11b Criteria for discontinuing or modifying allocated interventions for a  
23 given trial participant (eg, drug dose change in response to harms,  
24 participant request, or improving/worsening disease) **n/a**  
25

26 11c Strategies to improve adherence to intervention protocols, and any  
27 procedures for monitoring adherence (eg, drug tablet return,  
28 laboratory tests) **p10/11**  
29  
30

31 11d Relevant concomitant care and interventions that are permitted or  
32 prohibited during the trial **p12**  
33

34 Outcomes 12 Primary, secondary, and other outcomes, including the specific  
35 measurement variable (eg, systolic blood pressure), analysis metric  
36 (eg, change from baseline, final value, time to event), method of  
37 aggregation (eg, median, proportion), and time point for each  
38 outcome. Explanation of the clinical relevance of chosen efficacy and  
39 harm outcomes is strongly recommended **p12-14**  
40  
41

42 Participant 13 Time schedule of enrolment, interventions (including any run-ins and  
43 timeline washouts), assessments, and visits for participants. A schematic  
44 diagram is highly recommended (see Figure) **Table 1**  
45

46 Sample size 14 Estimated number of participants needed to achieve study objectives  
47 and how it was determined, including clinical and statistical  
48 assumptions supporting any sample size calculations **P15**  
49  
50

51 Recruitment 15 Strategies for achieving adequate participant enrolment to reach  
52 target sample size **P8**  
53

54 **Methods: Assignment of interventions (for controlled trials)**  
55

56 Allocation:  
57  
58  
59  
60

|    |                |     |                                                                         |
|----|----------------|-----|-------------------------------------------------------------------------|
| 1  |                |     |                                                                         |
| 2  | Sequence       | 16a | Method of generating the allocation sequence (eg, computer-             |
| 3  | generation     |     | generated random numbers), and list of any factors for stratification.  |
| 4  |                |     | To reduce predictability of a random sequence, details of any planned   |
| 5  |                |     | restriction (eg, blocking) should be provided in a separate document    |
| 6  |                |     | that is unavailable to those who enrol participants or assign           |
| 7  |                |     | interventions P9                                                        |
| 8  |                |     |                                                                         |
| 9  |                |     |                                                                         |
| 10 | Allocation     | 16b | Mechanism of implementing the allocation sequence (eg, central          |
| 11 | concealment    |     | telephone; sequentially numbered, opaque, sealed envelopes),            |
| 12 | mechanism      |     | describing any steps to conceal the sequence until interventions are    |
| 13 |                |     | assignedp9                                                              |
| 14 |                |     |                                                                         |
| 15 | Implementation | 16c | Who will generate the allocation sequence, who will enrol participants, |
| 16 |                |     | and who will assign participants to interventions P9                    |
| 17 |                |     |                                                                         |
| 18 |                |     |                                                                         |
| 19 | Blinding       | 17a | Who will be blinded after assignment to interventions (eg, trial        |
| 20 | (masking)      |     | participants, care providers, outcome assessors, data analysts), and    |
| 21 |                |     | how P 9                                                                 |
| 22 |                |     |                                                                         |
| 23 |                | 17b | If blinded, circumstances under which unblinding is permissible, and    |
| 24 |                |     | procedure for revealing a participant's allocated intervention during   |
| 25 |                |     | the trial n/a                                                           |
| 26 |                |     |                                                                         |
| 27 |                |     |                                                                         |

### Methods: Data collection, management, and analysis

|    |                 |     |                                                                          |
|----|-----------------|-----|--------------------------------------------------------------------------|
| 28 |                 |     |                                                                          |
| 29 |                 |     |                                                                          |
| 30 | Data collection | 18a | Plans for assessment and collection of outcome, baseline, and other      |
| 31 | methods         |     | trial data, including any related processes to promote data quality (eg, |
| 32 |                 |     | duplicate measurements, training of assessors) and a description of      |
| 33 |                 |     | study instruments (eg, questionnaires, laboratory tests) along with      |
| 34 |                 |     | their reliability and validity, if known. Reference to where data        |
| 35 |                 |     | collection forms can be found, if not in the protocolp10                 |
| 36 |                 |     |                                                                          |
| 37 |                 |     |                                                                          |
| 38 |                 | 18b | Plans to promote participant retention and complete follow-up,           |
| 39 |                 |     | including list of any outcome data to be collected for participants who  |
| 40 |                 |     | discontinue or deviate from intervention protocols                       |
| 41 |                 |     |                                                                          |
| 42 | Data            | 19  | Plans for data entry, coding, security, and storage, including any       |
| 43 | management      |     | related processes to promote data quality (eg, double data entry;        |
| 44 |                 |     | range checks for data values). Reference to where details of data        |
| 45 |                 |     | management procedures can be found, if not in the protocol               |
| 46 |                 |     |                                                                          |
| 47 |                 |     |                                                                          |
| 48 | Statistical     | 20a | Statistical methods for analysing primary and secondary outcomes.        |
| 49 | methods         |     | Reference to where other details of the statistical analysis plan can be |
| 50 |                 |     | found, if not in the protocol P15-6                                      |
| 51 |                 |     |                                                                          |
| 52 |                 | 20b | Methods for any additional analyses (eg, subgroup and adjusted           |
| 53 |                 |     | analyses) n/a                                                            |
| 54 |                 |     |                                                                          |
| 55 |                 | 20c | Definition of analysis population relating to protocol non-adherence     |
| 56 |                 |     | (eg, as randomised analysis), and any statistical methods to handle      |
| 57 |                 |     | missing data (eg, multiple imputation) P15-17                            |
| 58 |                 |     |                                                                          |
| 59 |                 |     |                                                                          |
| 60 |                 |     |                                                                          |

## Methods: Monitoring

|                 |     |                                                                                                                                                                                                                                                                                                                                                  |
|-----------------|-----|--------------------------------------------------------------------------------------------------------------------------------------------------------------------------------------------------------------------------------------------------------------------------------------------------------------------------------------------------|
| Data monitoring | 21a | Composition of data monitoring committee (DMC); summary of its role and reporting structure; statement of whether it is independent from the sponsor and competing interests; and reference to where further details about its charter can be found, if not in the protocol. Alternatively, an explanation of why a DMC is not needed <b>n/a</b> |
|                 | 21b | Description of any interim analyses and stopping guidelines, including who will have access to these interim results and make the final decision to terminate the trial <b>n/a</b>                                                                                                                                                               |
| Harms           | 22  | Plans for collecting, assessing, reporting, and managing solicited and spontaneously reported adverse events and other unintended effects of trial interventions or trial conduct <b>P14-15</b>                                                                                                                                                  |
| Auditing        | 23  | Frequency and procedures for auditing trial conduct, if any, and whether the process will be independent from investigators and the sponsor                                                                                                                                                                                                      |

## Ethics and dissemination

|                               |     |                                                                                                                                                                                                                                              |
|-------------------------------|-----|----------------------------------------------------------------------------------------------------------------------------------------------------------------------------------------------------------------------------------------------|
| Research ethics approval      | 24  | Plans for seeking research ethics committee/institutional review board (REC/IRB) approval <b>P22</b>                                                                                                                                         |
| Protocol amendments           | 25  | Plans for communicating important protocol modifications (eg, changes to eligibility criteria, outcomes, analyses) to relevant parties (eg, investigators, REC/IRBs, trial participants, trial registries, journals, regulators) <b>P 19</b> |
| Consent or assent             | 26a | Who will obtain informed consent or assent from potential trial participants or authorised surrogates, and how (see Item 32) <b>P8</b>                                                                                                       |
|                               | 26b | Additional consent provisions for collection and use of participant data and biological specimens in ancillary studies, if applicable <b>n/a</b>                                                                                             |
| Confidentiality               | 27  | How personal information about potential and enrolled participants will be collected, shared, and maintained in order to protect confidentiality before, during, and after the trial                                                         |
| Declaration of interests      | 28  | Financial and other competing interests for principal investigators for the overall trial and each study site <b>P23</b>                                                                                                                     |
| Access to data                | 29  | Statement of who will have access to the final trial dataset, and disclosure of contractual agreements that limit such access for investigators                                                                                              |
| Ancillary and post-trial care | 30  | Provisions, if any, for ancillary and post-trial care, and for compensation to those who suffer harm from trial participation <b>n/a</b>                                                                                                     |



- 1  
2  
3  
4  
5  
6  
7  
8  
9  
10  
11  
12  
13
- |                         |     |                                                                                                                                                                                                                                                                                         |
|-------------------------|-----|-----------------------------------------------------------------------------------------------------------------------------------------------------------------------------------------------------------------------------------------------------------------------------------------|
| Dissemination<br>policy | 31a | Plans for investigators and sponsor to communicate trial results to participants, healthcare professionals, the public, and other relevant groups (eg, via publication, reporting in results databases, or other data sharing arrangements), including any publication restrictions P19 |
|                         | 31b | Authorship eligibility guidelines and any intended use of professional writers P19                                                                                                                                                                                                      |
|                         | 31c | Plans, if any, for granting public access to the full protocol, participant-level dataset, and statistical code                                                                                                                                                                         |

## 14 Appendices

- 15  
16  
17  
18  
19  
20  
21  
22
- |                               |    |                                                                                                                                                                                                |
|-------------------------------|----|------------------------------------------------------------------------------------------------------------------------------------------------------------------------------------------------|
| Informed consent<br>materials | 32 | Model consent form and other related documentation given to participants and authorised surrogates                                                                                             |
| Biological<br>specimens       | 33 | Plans for collection, laboratory evaluation, and storage of biological specimens for genetic or molecular analysis in the current trial and for future use in ancillary studies, if applicable |

---

23  
24  
25  
26  
27  
28  
29  
30  
31  
32  
33  
34  
35  
36  
37  
38  
39  
40  
41  
42  
43  
44  
45  
46  
47  
48  
49  
50  
51  
52  
53  
54  
55  
56  
57  
58  
59  
60

\*It is strongly recommended that this checklist be read in conjunction with the SPIRIT 2013 Explanation & Elaboration for important clarification on the items. Amendments to the protocol should be tracked and dated. The SPIRIT checklist is copyrighted by the SPIRIT Group under the Creative Commons "[Attribution-NonCommercial-NoDerivs 3.0 Unported](https://creativecommons.org/licenses/by-nc-nd/3.0/)" license.



# BMJ Open

**Physiotherapy exercise rehabilitation with tailored exercise adherence support for people with osteoporosis and vertebral fractures: Protocol for a randomised controlled trial – the Osteoporosis Tailored exercise adherence intervention (OPTIN) study.**

|                                 |                                                                                                                                                                                                                                                                                                                                                                                                                                                                                                                                               |
|---------------------------------|-----------------------------------------------------------------------------------------------------------------------------------------------------------------------------------------------------------------------------------------------------------------------------------------------------------------------------------------------------------------------------------------------------------------------------------------------------------------------------------------------------------------------------------------------|
| Journal:                        | <i>BMJ Open</i>                                                                                                                                                                                                                                                                                                                                                                                                                                                                                                                               |
| Manuscript ID                   | bmjopen-2022-064637.R1                                                                                                                                                                                                                                                                                                                                                                                                                                                                                                                        |
| Article Type:                   | Protocol                                                                                                                                                                                                                                                                                                                                                                                                                                                                                                                                      |
| Date Submitted by the Author:   | 22-Aug-2022                                                                                                                                                                                                                                                                                                                                                                                                                                                                                                                                   |
| Complete List of Authors:       | Barker, Karen L.; University of Oxford, Nuffield Department of Orthopaedics, Rheumatology and Musculoskeletal Sciences Room, Jonathan; Oxford University Hospitals NHS Foundation Trust, Physiotherapy Research Unit<br>Knight, Ruth; University of Oxford, Nuffield Department of Orthopaedics, Rheumatology and Musculoskeletal Sciences<br>Hannink, Erin; Oxford University Hospitals NHS Foundation Trust, Physiotherapy Research Unit<br>Newman, Meredith; Oxford University Hospitals NHS Foundation Trust, Physiotherapy Research Unit |
| <b>Primary Subject Heading</b>: | Rheumatology                                                                                                                                                                                                                                                                                                                                                                                                                                                                                                                                  |
| Secondary Subject Heading:      | Rehabilitation medicine                                                                                                                                                                                                                                                                                                                                                                                                                                                                                                                       |
| Keywords:                       | Back pain < ORTHOPAEDIC & TRAUMA SURGERY, RHEUMATOLOGY, REHABILITATION MEDICINE                                                                                                                                                                                                                                                                                                                                                                                                                                                               |
|                                 |                                                                                                                                                                                                                                                                                                                                                                                                                                                                                                                                               |

SCHOLARONE™  
Manuscripts

1  
2  
3  
4 **1 Physiotherapy exercise rehabilitation with tailored exercise adherence support for people with**  
5 **osteoporosis and vertebral fractures: Protocol for a randomised controlled trial – the Osteoporosis**  
6 **2 Tailored exercise adherence intervention (OPTIN) study.**  
7  
8  
9

10 4 Authors: Karen L Barker 1,2 \*, Jonathan Room 1, Ruth Knight 3, Erin Hannink 1, Meredith  
11 Newman 1.  
12  
13

14 6 1. Physiotherapy Research Unit, Nuffield Orthopaedic Centre, Oxford University  
15 Hospitals Foundation Trust, Oxford, OX3 7HE, UK.  
16  
17

18 8 2. Nuffield Department of Orthopaedics, Rheumatology and Musculoskeletal Sciences,  
19 University of Oxford, OX3 7LD.  
20  
21

22 10 3. Oxford Clinical Trials Research Unit (OCTRU), Centre for Statistics in Medicine,  
23 Nuffield Department of Orthopaedics, Rheumatology and Musculoskeletal Sciences,  
24 University of Oxford, Oxford, UK.  
25  
26  
27  
28

29 13 Authors: job title and affiliations  
30  
31

32 14 Karen L Barker, Professor of Physiotherapy 1,2\*, ORCID 0000-0001-9363-0383  
33  
34

35 15 Jonathan Room, Research Physiotherapist1, ORCID 0000-0002-1257-834X  
36  
37

38 16 Ruth Knight, Senior Medical Statistician 3, ORCID 0000-0001-6810-2845  
39  
40

41 17 Erin Hannink, Research Physiotherapist 1. ORCID 0000-0002-1422-4625  
42  
43

44 18 Meredith Newman, Research Physiotherapist 1 ORCID 0000-0002-7228-2022  
45  
46

47 19 \* Please direct correspondence to:  
48  
49

50 20 Professor Karen Barker  
51  
52

53 21 Physiotherapy Research Unit, Nuffield Orthopaedic Centre, Oxford University Hospitals NHS  
54 Foundation Trust, Windmill Road, Oxford, OX3 7LD, UK.  
55

56 23 [Karen.barker@ouh.nhs.uk](mailto:Karen.barker@ouh.nhs.uk)  
57  
58

59 24 Keywords: Physical therapy modalities; exercise, osteoporosis, spine, rehabilitation  
60

1  
2  
3  
4  
5  
6  
7  
8  
9  
10  
11  
12  
13  
14  
15  
16  
17  
18  
19  
20  
21  
22  
23  
24  
25  
26  
27  
28  
29  
30  
31  
32  
33  
34  
35  
36  
37  
38  
39  
40  
41  
42  
43  
44  
45  
46  
47  
48  
49  
50  
51  
52  
53  
54  
55  
56  
57  
58  
59  
60

1 Word count 4011.

For peer review only

## 1           2           3           4           5           6           7           8           9           10           11           12           13           14           15           16           17           18           19           20           21           22           23           24           25           26           27           28           29           30           31           32           33           34           35           36           37           38           39           40           41           42           43           44           45           46           47           48           49           50           51           52           53           54           55           56           57           58           59           60

### 1           2           3           4           5           6           7           8           9           10           11           12           13           14           15           16           17           18           19           20           21           22           23           24           25           26           27           28           29           30           31           32           33           34           35           36           37           38           39           40           41           42           43           44           45           46           47           48           49           50           51           52           53           54           55           56           57           58           59           60

**1           2           3           4           5           6           7           8           9           10           11           12           13           14           15           16           17           18           19           20           21           22           23           24           25           26           27           28           29           30           31           32           33           34           35           36           37           38           39           40           41           42           43           44           45           46           47           48           49           50           51           52           53           54           55           56           57           58           59           60**

**Introduction:** Vertebral fragility fractures affect at least 20% of the older population in the UK. Best practice guidelines recommend the use of exercise to slow the rate of bone loss, to maintain muscle strength and physical function, and to prevent falls and further fractures. However, treatment effects are often small and difficult to sustain and adherence, or the extent to which patients engage in treatment, has been identified as an important issue by many studies. Our hypothesis is that integrating adherence intervention strategies with an exercise intervention will be beneficial. We will compare physiotherapy exercise rehabilitation with adherence support versus physiotherapy exercise rehabilitation alone in terms of effects on (a) physical function, quality of life, and fear of falling and (b) exercise self-efficacy and adherence.

**Methods and Analysis:** A multicentre, two-arm, parallel group, superiority randomised controlled trial (RCT) with blinded assessments at baseline (0) and 4, 8, and 12 months, with a nested qualitative study and health economic analysis. 116 participants will be allocated to either (i) out-patient physiotherapy which will include a musculoskeletal assessment and treatment including balance, posture, strength training and low impact weight-bearing exercises over 16 weeks; or (ii) Opt-In intervention. This includes standard physiotherapy as above plus an additional, integrated assessment interview (30mins) and 60 minutes of adherence support spread over the subsequent 16 weeks.

**Ethics and Dissemination:** The study protocol was approved by West of Scotland Research Ethics Committee 4 (21/WS/0071). Trial registration number ISRCTN 14465704. The paper is based on Protocol v4.

### **Strengths and Limitations of this study**

- The Physiotherapy exercise rehabilitation with tailored exercise adherence support for people with osteoporosis and vertebral fractures (Opt-In) study is a multicentre randomised controlled trial with an embedded qualitative study and economic evaluation.
- It will recruit from at least six NHS hospitals.
- The intervention addresses adherence which is an important confounder in many trials of physiotherapy.
- The intervention was developed using current research evidence, input from expert clinicians, researchers and patient / public representatives.
- Due to the nature of the interventions the physiotherapists delivering the treatments and the participants cannot be blinded.

## 1 Introduction

2 Vertebral fragility fractures (VFFs) affect at least 20% of the older population in the UK and present a  
3 significant health and economic burden [1, 2]. They are associated with back pain, fatigue, low  
4 mood, restrictions in physical function and activities of daily living, and marked, persistent  
5 reductions in quality of life (QoL) [1, 2]. Without treatment, progression and functional decline are  
6 expected. Conservative treatment for osteoporosis includes bone protective medications and  
7 lifestyle adaptations. Guidelines recommend people with osteoporosis keep active and exercise to  
8 slow the rate of bone loss, to maintain muscle strength and physical function and to prevent falls  
9 and further fractures [3,4]. Exercise prescription with multi-component exercise programmes that  
10 include postural, balance, aerobic weight-bearing and strength exercises are recommended [1-3].

11 Trials evaluating exercise in people with VFFs have reported benefits across a range of outcomes [1,  
12 2, 5-10], with a recent Cochrane review concluding there is moderate-quality evidence that exercise  
13 improves physical function [1]. However, treatment effects are often small and difficult to sustain  
14 [1, 2, 5-10]. For example, in the PROVE trial, significant, clinically relevant benefits to back muscle  
15 endurance, balance, walking capacity and physical function following physiotherapy exercise at 4  
16 months post-randomisation did not persist at 12 months [2]. Adherence, or the extent to which  
17 patients engage in treatment, has been identified as an important issue by many studies [1, 2, 5-6,  
18 9]. Partial adherence or non-adherence is associated with worse outcomes and conversely, higher  
19 adherence with better outcomes [1, 2, 5-10].

20 Multiple factors affect exercise adherence in older people with chronic health conditions including  
21 osteoporosis [11, 12]. These include low exercise self-efficacy, low motivation, depression,  
22 insufficient exercise knowledge or skill, physical ability, negative views about treatment and exercise  
23 programme design [11,12]. Considering this complexity, interventions to support adherence that  
24 recognize personal barriers and facilitators to exercise and that can draw upon multiple adherence  
25 techniques are recommended [12, 13].

1  
2  
3 1 Behavioural approaches can include interventions that support exercise through providing additional  
4  
5 2 monitoring, interventions that aim to alter thinking patterns that contribute to non-adherence and  
6  
7 3 ones that strengthen behaviours that support adherence [12]. Motivational interviewing is a  
8  
9  
10 4 collaborative process that explores potential ambivalence, obstacles and facilitators surrounding  
11  
12 5 behaviour change [6]. There is evidence that additional monitoring, prompts and feedback can  
13  
14 6 benefit adherence in older adults e.g., via telephone call/ text messages, wearable activity monitors  
15  
16 7 or by enriching environmental cues [1]. Incorporating exercise into everyday routines can make it  
17  
18 8 easier to initiate and sustain and creating 'Exercise Action Plans' that specify when, where and how  
19  
20 9 exercises are undertaken can support this process [1, 13]. Using an intervention mapping approach,  
21  
22  
23 10 we developed an exercise adherence intervention underpinned theoretically by the Capability,  
24  
25 11 Opportunity, Motivation - Behaviour (COM-B) behaviour change model [14, 15].  
26  
27  
28

## 29 12 **Aims**

30  
31  
32 13 The aims of this study are:

- 33  
34  
35 14 • To compare physiotherapy exercise rehabilitation with adherence support with  
36  
37 15 physiotherapy exercise rehabilitation alone in terms of effects on: (a) physical function,  
38  
39 16 quality of life, and fear of falling and (b) exercise self-efficacy and adherence.  
40  
41 17 • To explore patient and physiotherapist views of the intervention and of adhering to exercise.  
42  
43  
44 18 • To understand if physiotherapy exercise rehabilitation with adherence support is cost-  
45  
46 19 effective.  
47  
48

## 49 20 **METHODS AND ANALYSES**

### 50 51 52 21 Study design

53  
54  
55 22 A multicentre, two-arm, parallel group, superiority randomised controlled trial (RCT) with blinded  
56  
57 23 assessments at baseline (0) and 4, 8, and 12 months following randomisation, with a nested  
58  
59 24 qualitative study and health economic analysis. Participants will be allocated to either (i) outpatient  
60

1 physiotherapy which will include a musculoskeletal assessment and 6 treatment sessions over 16  
2 weeks based on the current best practice guidance from the Royal Osteoporosis Society; or (ii) the  
3 Opt-In intervention. This includes outpatient physiotherapy as described above, plus an additional,  
4 integrated assessment interview (30mins) and 60 minutes of adherence support spread over the  
5 subsequent treatment period of 16 weeks as prescribed by the physiotherapist in collaboration with  
6 the participant. Sessions in both arms can be in-person or virtually via video-call/ telephone as  
7 agreed between participant and therapist (**Figure 1**).

8 The trial started recruitment of patients in August 2021 and will continue recruiting until June 2023.

### 9 Setting

10 At least six National Health Service (NHS) hospitals and their related physiotherapy services.

### 11 Study Participants

12 Adults aged 55 years or over who have a diagnosis of at least one previous osteoporotic vertebral  
13 fracture and back pain.

### 14 Eligibility

#### 15 Inclusion Criteria

16 Participants may enter the study if they meet ALL the following criteria:

- 17 • Men and women  $\geq 55$  years: all women must be at least 1 year post-menopausal.
- 18 • One or more VFFs confirmed by radiography, X-Ray, MRI, CT or DEXA scan, people with VFF  
19 of any severity and at any time-point post-fracture are eligible.
- 20 • They must have had an episode of back pain in the previous 12 months.
- 21 • All must be able to walk at least 10 metres independently with or without a walking aid.

## 1 Exclusion Criteria

2 Participants may not enter the study if ANY of the following apply:

- 3 • Current conditions that would make participating in physiotherapy or exercise unsafe or  
4 confound results. This includes those with significant neurological and psychiatric conditions,  
5 severe unstable cardiovascular or pulmonary disease.
- 6 • Bone loss secondary to other metabolic disorders, diseases or medication e.g., rheumatoid  
7 arthritis, anorexia, cancer, coeliac disease, steroid use.
- 8 • Individuals whose primary problem is back pain that involves pain radiating into the lower  
9 limbs.
- 10 • Vertebroplasty, facet joint injection or physiotherapy within past 12 weeks.

## 11 Recruitment

12 A member of the patient's direct care team will identify potential participants with VFFs via clinic  
13 lists and electronic medical records from relevant metabolic bone clinics, radiology clinics (DEXA),  
14 physiotherapy referral lists, and from Rheumatology clinics.

## 15 Screening and eligibility assessment

16 Potential participants, who respond to an invitation letter will be contacted by telephone to discuss  
17 the study further, to check eligibility and to answer any questions. Patients who do not meet the  
18 eligibility criteria or who do not wish to participate will receive standard NHS treatment. We will  
19 record the age and gender of these patients to assess the generalisability of those recruited.

## 20 Consent

21 Participants who are eligible and willing to proceed will be approached for informed consent.; they  
22 and the researcher will sign and date a consent form. For participants who are recruited to the



1  
2  
3 1 additional nested qualitative study and interviewed on-line or via telephone, informed consent will  
4  
5 2 be obtained verbally before the interview. The researcher taking consent will read, and fill out, the  
6  
7 3 consent form on behalf of the participant and then sign the form.  
8  
9

10  
11 4

#### 12 13 14 5 Randomisation

15  
16 6 Consented participants will be randomised 1:1 using a computer-generated randomisation schedule  
17  
18 7 prepared by the trial statistician (RK). Individual randomisation will be stratified by recruitment  
19  
20 8 centre and permuted blocks of varying undisclosed sizes will be used. The randomisation schedule  
21  
22 9 will be concealed in sequentially numbered, opaque, sealed envelopes for each site. A study  
23  
24 10 administrator who has no interaction with blinded study staff will manage these envelopes. The  
25  
26 11 administrator will open the randomisation envelope, and then communicate with the local site who  
27  
28 12 will make the participant aware of their allocated group and refer for physiotherapy; making sure  
29  
30 13 that participants are allocated to physiotherapists delivering the treatment for their allocated arm.  
31  
32  
33

#### 34 35 14 Blinding

36  
37  
38 15 Physiotherapists delivering the interventions and participants will be told the treatment allocation.  
39  
40 16 Initial baseline assessment will occur prior to randomisation and the researcher undertaking  
41  
42 17 assessments will not be involved in any part of the randomisation procedure to ensure that they are  
43  
44 18 not able to bias the group allocation. The researcher conducting follow-up measures and the  
45  
46 19 research team personnel entering data will also not be informed of allocated group and participants  
47  
48 20 will be asked and reminded not to disclose their treatment group to the researcher at follow-up  
49  
50 21 appointments.  
51  
52  
53

#### 54 55 22 Interventions

#### 56 57 58 23 Training and monitoring

1  
2  
3 1 Sessions in both arms can be delivered in-person or virtually via video-call/ telephone as agreed  
4  
5 2 between participant and therapist; to allow flexibility and resilience as COVID restrictions on physical  
6  
7 3 attendance vary. Treatments were standardised and manualised and the study team provided  
8  
9 4 training in the multi-component exercise therapy treatments (delivered to all participants) to all  
10  
11 5 treating physiotherapists. Training in the behavioural adherence support intervention which  
12  
13 6 comprised assessment and a set of 9 behavioural interventions (the Opt-In toolkit) was delivered  
14  
15 7 separately to the therapists in the Opt-In arm. Treating physiotherapists will record the delivery and  
16  
17 8 content of each treatment session in adherence logs for each participant. Regular site visits will be  
18  
19 9 carried out to monitor intervention fidelity.  
20  
21  
22  
23

#### 24 10 Standard Care

25  
26  
27 11 Participants will be offered a 1-hour physiotherapy assessment and six individual outpatient  
28  
29 12 physiotherapy sessions spread over 16 weeks [2]. The physiotherapy will include a musculoskeletal  
30  
31 13 assessment and treatment including a multi-component, progressed balance, posture, strength  
32  
33 14 training and low impact weight-bearing exercise [3]. Exercise intensity will be assessed using the 10-  
34  
35 15 point Rating of Perceived Exertion scale (CR10-RPE), so participants work at a moderately hard to  
36  
37 16 hard (RPE 4-6) intensity. Although current practice may vary, the package agreed as the standard  
38  
39 17 care is based on consensus, best practice guidelines and successful delivery in the PROVE trial  
40  
41 18 exercise arm [2] and aims to be a credible representation of current best practice treatment across  
42  
43 19 the NHS. Treating therapists will receive prior training on prescription of the exercises [2].  
44  
45  
46  
47

#### 48 20 Opt -In

49  
50  
51 21 Participants allocated to Opt-In will receive the standard package described above, plus an  
52  
53 22 additional, integrated assessment interview (30mins) and 60 minutes of adherence support spread  
54  
55 23 over the subsequent treatment period of 16 weeks in an individualised pattern as required by the  
56  
57 24 participant.  
58  
59  
60

1  
2  
3 1 Participants in the Opt-In arm will complete the Personalized Exercise Questionnaire (PEQ). The PEQ  
4  
5 2 was developed in Canada to support patient-centred exercise prescription for people with  
6  
7 3 osteoporosis and covers topics such as barriers to exercise and goals of treatment [16]. Treating  
8  
9 4 physiotherapists will have a collaborative discussion with the participant using a motivational  
10  
11 5 interviewing approach drawing upon PEQ responses and considering goals, motivators, facilitators,  
12  
13 6 and barriers surrounding exercise. It aims to provide physiotherapists with a deeper understanding  
14  
15 7 of patient motivations and circumstances, to strengthen the therapeutic alliance and the patient's  
16  
17 8 own motivations for adopting exercise [12]. Using their assessment findings, the questionnaire and  
18  
19 9 collaborative interview the physiotherapist will assess a participant's exercise capability (C),  
20  
21 10 opportunity (O) and motivation (M) to carry out exercise behaviour (B) (COM-B) and select an  
22  
23 11 adherence technique from the Opt-In toolkit in response [14]. Techniques can include education  
24  
25 12 about osteoporosis and exercises, education about and practice of fall prevention strategies,  
26  
27 13 Exercise Action Plans, a contact telephone call, and self-monitoring and feedback strategies such as,  
28  
29 14 exercise confidence rating scales or using an exercise diary. Techniques are linked to COM-B  
30  
31 15 domains to facilitate physiotherapist decision-making e.g., Education improves capability and  
32  
33 16 motivation (C, M) and a diagrammatic decision aid was developed to facilitate rapid decision-making  
34  
35 17 during treatment. Each Opt-In arm treating physiotherapist received a toolkit and training by the  
36  
37 18 study team about techniques and how to use them. Physiotherapists were asked to prescribe at  
38  
39 19 least 3 adherence techniques from the Opt-In toolkit over 16 weeks but could use more. The exact  
40  
41 20 techniques selected were personalised to the patient as was the pattern and spread of the 60-  
42  
43 21 minute adherence support time. Participants in the intervention arm were given a folder that  
44  
45 22 included their exercises and selected adherence materials e.g., exercise diary, education leaflet,  
46  
47 23 action plan record. Figure 2 summarises the intervention in a logic model.  
48  
49  
50  
51  
52  
53  
54  
55  
56  
57  
58  
59  
60

25 Concomitant care

1  
2  
3 1 Other aspects of health and social care will continue as usual. Analgesia and other medication use  
4  
5 2 will be collected by self-report diary. Additional treatments sourced outside of the trial including  
6  
7 3 contact with general practitioners and other health care professionals will be recorded in self-report  
8  
9 4 health utilisation diaries in which participants will be asked to record their use of health and social care  
10  
11 5 services across the study e.g., GP, nurse, other physio, hospital admissions, home carer visits in  
12  
13 6 standardised study diaries. Diaries will be from 0-4, 4 to 8 and 8 to 12 months [17].  
14  
15  
16

### 17 Outcome Measures

18  
19  
20 8 The primary outcome measure will be the Timed Up and Go (TUG) at 12 months. The TUG is a test of  
21  
22 9 balance, lower limb strength and walking ability with established reliability and validity. It records  
23  
24 10 the time a person takes to stand up from a chair, walk 3 metres at a self-selected speed, turn, walk  
25  
26 11 back and sit down [18].  
27  
28  
29

30 12 Secondary outcome measures are:

- 31  
32  
33 13 • QUALEFFO 41: a disease specific measure of health-related quality of life (QoL) applicable to  
34  
35 14 patients with osteoporosis and vertebral fractures. It is a self-administered questionnaire  
36  
37 15 that provides scores on five domains: pain, physical function, social function, general health  
38  
39 16 perception, mental performance, and a total score. [19].  
40  
41  
42  
43 17
- 44  
45  
46 18 • Timed Loaded Standing (TLS): an assessment of shoulder and back muscle endurance for  
47  
48 19 people with VFF(s). [20].  
49  
50  
51  
52 20
- 53  
54  
55 21 • Thoracic kyphosis angle: measured non-radiographically using a flexicurve ruler, allowing an  
56  
57 22 angle of kyphosis to be calculated which is approximated to radiological measures of  
58  
59 23 kyphosis (Cobb angle) using a standardised formula [21].  
60

- 1  
2  
3 1 • Back pain: measured with a 10-point Numeric Pain Rating Scale (NPRS) [22].  
4  
5 2  
6  
7  
8 3 • Functional Reach (FR) test: a measure of dynamic standing balance developed for older  
9  
10 4 adults. The test has been used in people with VFF and performance is predictive of falls  
11  
12 5 risk [23].  
13  
14  
15 6  
16  
17  
18 7 • Six-minute walk (6MW) test: a measure of functional walking capacity and aerobic cardio-  
19  
20 8 respiratory fitness [24].  
21  
22  
23 9  
24 10 • Falls Efficacy Scale International (FES-I): a 16 item (3 minute) self-report measure of fear or  
25  
26 11 concern about falling during activities [25].  
27  
28  
29  
30 12  
31  
32  
33 13 • Grip Strength: is the maximum force the hand and forearm muscles can generate measured  
34  
35 14 with an isometric hand dynamometer in kilograms; maximum strength is the mean of three  
36  
37 15 trials (3 seconds each) and measured for both hands [26].  
38  
39  
40 16  
41  
42  
43 17 • Self-efficacy for exercise (SEE) scale: a brief (<5 minute) 9-item scale that asks participants to  
44  
45 18 rate how confident they would be that they would engage in exercise on a 10-point scale  
46  
47 19 (not confident to very confident) under different situations e.g., if they were tired. SEE  
48  
49 20 ratings are predictive of exercise behaviour [27].  
50  
51  
52  
53 21  
54  
55  
56 22 • Adherence. This will be measured in two ways:  
57  
58  
59  
60

- 1  
2  
3 1 a. Attendance records via clinician completed treatment logs, including a checkbox to log  
4  
5 2 whether adherence techniques have been prescribed (intervention group only).  
6  
7  
8 3 b. Exercise adherence rating scale (EARS): a brief 6-item scale that asks participants to  
9  
10 4 describe how they do their recommended exercises on a 5-point scale [28].  
11  
12  
13  
14 5 • Falls: documented on the CRF and prospectively using participant completed event diaries.  
15  
16 6 These will be collected in blocks from 0-4 months, 4 to 8 months, and 8 to 12 months during  
17  
18 7 the study. Incidence and severity formation will be recorded e.g., nature of the fall, its  
19  
20 8 outcome (no-harm, fracture etc) and any treatment required [2].  
21  
22  
23 9  
24  
25 10 • EQ-5D-5L is a short, generic measure of health related QoL and will be completed to assist  
26  
27 11 assessment of health economics [29].  
28  
29  
30  
31 12  
32  
33  
34 13  
35  
36 14 A summary of outcome measures and timepoints is shown in Table 1 (**Table 1**).  
37  
38 15  
39  
40  
41 16  
42  
43  
44  
45  
46  
47  
48  
49  
50  
51  
52  
53  
54  
55  
56  
57  
58  
59  
60

A summary of outcome measures and timepoints is shown in Table 1 (**Table 1**).

1

| Time Point                | Measurement                                         | Enrolment | allocation | Baseline | 4 months | 8 months | 12 months |
|---------------------------|-----------------------------------------------------|-----------|------------|----------|----------|----------|-----------|
| Screening Log             |                                                     | X         |            |          |          |          |           |
| Eligibility confirmed     |                                                     | x         |            |          |          |          |           |
| Informed Consent          |                                                     | x         |            |          |          |          |           |
| Randomisation             |                                                     |           | x          |          |          |          |           |
| Demographic               | Age, gender, weight, ethnicity,                     |           |            | x        |          |          |           |
| Primary OM                | Timed Up & Go                                       |           |            | x        | x        | x        | x         |
| Quality of Life           | QUALEFFO 41                                         |           |            | X        | X        | X        | X         |
| Fear Falling              | FES-I                                               |           |            | X        | X        | X        | X         |
| Back Pain Intensity       | NRS-P                                               |           |            | X        | X        | X        | X         |
| Back strength / endurance | TLS                                                 |           |            | X        | X        | X        | X         |
| Walking                   | 6MWT                                                |           |            | X        | X        | X        | X         |
| Balance                   | Functional Reach Test                               |           |            | X        | X        | X        | X         |
| Kyphosis                  | Flexicurve                                          |           |            | X        | X        | X        | X         |
| Grip Strength             | Dynamometer                                         |           |            | x        | x        | x        | x         |
| EQ-5D-5L                  | Health economics                                    |           |            | x        | x        | x        | x         |
| Falls                     | Number of reported falls. Nature; outcome of falls. |           |            |          | x        | x        | x         |
| Exercise Self Efficacy    | SEE                                                 |           |            | X        | X        | X        | X         |
| Exercise adherence        | EARS                                                |           |            | X        | X        | X        | X         |
| Exercise adherence        | Sessions attended                                   |           |            |          | x        | x        | x         |

2

3 Table 1: Time Points at which outcomes will be assessed.

4

5 Adverse events

6 Adverse events (AE) occurring because of the trial interventions will be recorded. Participants will

7 receive information on potential AEs resulting from the exercises and what they should do if they

1  
2  
3 1 experience an AE, as would be part of standard NHS procedure. Adverse symptoms in response to  
4  
5 2 treatment and any adverse events will be monitored by clinicians regularly and in line with local  
6  
7 3 departmental procedures and captured on adverse event forms, and via questions on the CRF.  
8  
9  
10 4 A Serious AE (SAE) is any untoward medical occurrence related to the trial interventions that results  
11  
12 5 in death, is life-threatening, requires inpatient hospitalisation or prolongation of existing  
13  
14 6 hospitalisation, or results in persistent or significant disability/incapacity. SAEs are likely to be rare  
15  
16 7 and are unlikely to occur as a result of the exercise programmes delivered in this study.  
17  
18  
19 8 Any reports of SAE will be reported to the trial office within 24 hours of the local research team  
20  
21 9 becoming aware of the event. They will be reviewed by an independent medically qualified assessor  
22  
23 10 within 3 days.  
24  
25  
26  
27

## 28 Statistics and analysis

### 31 Sample Size

32  
33  
34 13 The primary outcome is the Timed Up & Go (TUG) test. This is the most widely used physical function  
35  
36 14 measure in RCTs of exercise for people with VFF [4]. The minimal clinically important difference  
37  
38 15 (MCID) for the TUG has not been established in people with VFF(s), but a MCID of 1.4s is reported for  
39  
40 16 similar older populations with chronic musculoskeletal disorders [30]. The study requires 104  
41  
42 17 participants (52 per arm) to be 80% powered to detect a 1.4s difference in TUG score between  
43  
44 18 groups at a 5% significance level (two-sided) assuming that the standard deviation is 2.5s. Similar  
45  
46 19 trials have had loss to follow-up rates of 10% at 12 months [2]. To account for this the sample size  
47  
48 20 has been inflated to 116 participants (58 per arm).  
49  
50  
51  
52

### 53 Statistical Analysis

54  
55  
56 22 The study will be reported according to the Consolidated Standards of Reporting Trials (CONSORT)  
57  
58 23 2010 statement utilising the nonpharmacological and patient-reported outcome extensions [ 31,32].  
59  
60



1  
2  
3 1 Standard descriptive statistics will be used to describe the characteristics of the two groups at  
4  
5 2 baseline. Means and standard deviations (SDs) or medians and interquartile ranges (IQRs) as  
6  
7 3 appropriate will be used for continuous variables, and numbers and percentages will be used for  
8  
9 4 binary and categorical variables.

10  
11  
12  
13 5 Compliance with the intervention will be defined as participating in the extended interview and  
14  
15 6 prescription of at least 3 adherence support techniques. This will be recorded on treatment logs.  
16  
17 7 Details of the number of physiotherapy sessions attended will also be summarised by treatment  
18  
19 8 group. The number and proportion of participants who withdraw will be summarised along with  
20  
21 9 reasons for these. Deaths are not anticipated in this study, but details of any that do occur will also  
22  
23 10 be summarised by treatment arm.

24  
25  
26  
27 11 Summary statistics will be presented for all comparative outcomes, and effect estimates will be  
28  
29 12 reported together with 95% confidence intervals with all tests carried out at a 5% two-sided  
30  
31 13 significance level.

32  
33  
34  
35 14 At 12 months post-randomisation the two treatment groups will be compared on the TUG measure  
36  
37 15 using a multivariate linear regression model adjusting for recruiting centre (stratification factor), age  
38  
39 16 and baseline TUG score. An unadjusted t-test will also be undertaken. The TUG is also recorded at 4,  
40  
41 17 and 8 months after randomisation, and an additional analysis utilising all time points, using multi-  
42  
43 18 level modelling and including a treatment by time interaction if appropriate will be undertaken. For  
44  
45 19 each of these models, the assumption of approximate normality will be assessed by examining the  
46  
47 20 residuals. If this assumption is not met the first approach will be to consider a transformation to  
48  
49 21 achieve normality. If this is not possible, the two groups will be compared using non-parametric  
50  
51 22 methods (e.g., Mann-Whitney U-test). This analysis will be unadjusted and will consider each time  
52  
53 23 point separately.  
54  
55  
56  
57  
58  
59  
60

1  
2  
3 1 Similar analyses will be performed for secondary outcomes which can be considered approximately  
4  
5 2 continuous (QUALEFFO-41, FES-1, NPRS, TLS, Grip strength, 6MW, FRT, Thoracic kyphosis, SEE and  
6  
7 3 EARS) at 4-, 8- and 12-months post-randomisation. The appropriateness of the assumption of  
8  
9 4 approximate normality will also be considered and transformation to normality or non-parametric  
10  
11 5 methods used as appropriate. It is not anticipated that the number of falls will be approximately  
12  
13 6 normal, therefore, this will be summarised by treatment group using medians and IQRs and  
14  
15 7 compared using non-parametric methods. The number and proportion of participants experiencing  
16  
17 8 an AE during follow-up will be summarised by treatment group and a logistic regression model  
18  
19 9 adjusted for recruiting centre will be used to compare the rates in the two groups. Severity of AEs  
20  
21 10 will also be summarised by treatment group.

22  
23  
24  
25  
26 11 In addition, since previous work suggests that change in thoracic kyphosis at follow-up is closely  
27  
28 12 related to baseline values, a subgroup analysis of thoracic kyphosis at follow-up will be completed  
29  
30 13 dependent on whether the participant was kyphotic at baseline [33].

31  
32  
33  
34 14 All analyses will be performed for the intention to treat (ITT) population. This will include all  
35  
36 15 randomised participants with available data who will be analysed according to their allocated  
37  
38 16 intervention regardless of the treatment they received.

39  
40  
41 17 In addition, analysis of the primary outcome (TUG at 12 months) will be repeated for the per  
42  
43 18 protocol (PP) population which will include only those participants who received their allocated  
44  
45 19 treatment. Participants with other major protocol deviations (e.g., recruited and later found to be  
46  
47 20 ineligible) will also be excluded from this population.

### 51 Health Economic Analysis

52  
53  
54 22 The relative efficiency of the intervention will be assessed by within-trial cost-utility and cost-  
55  
56 23 consequences analyses [34]. The evaluation will take an NHS and personal social services  
57  
58 24 perspective. Resource use for the delivery of Opt-In and at participant level will be combined with  
59  
60

1 unit cost from standard national sources to estimate average total costs. We will estimate the  
2 incremental cost per quality-adjusted life year (QALY) (from EQ-5D-5L) and present the different cost  
3 components and multiple benefits of Opt-In in a 'balance sheet' in the cost-consequences analysis.

#### 4 Embedded Qualitative study

5 As part of the main study a nested qualitative study will take place. The qualitative element of this  
6 study will involve a subset (12-15) of patients who undertake the Opt-In intervention who will be  
7 invited to take part in 4 short (15-20 minute) interviews about their experiences and views about  
8 exercise adherence and the adherence intervention at the following time points: i) following  
9 assessment ii) during treatment (after 3 sessions), iii) post-treatment (after 4 months), and iv) at 12  
10 months. The interviews may occur online via video-call or face-to-face in the person's home or at a  
11 local clinic, depending on participant preference. The interviews will be audio recorded and  
12 transcribed verbatim. Participants will be given an opportunity to check the interview transcript.  
13 Focus groups will be conducted with physiotherapists who undertake the Opt-In intervention, asking  
14 them to share their views about promoting exercise adherence and the Opt-In intervention, these  
15 will be audio-recorded with a Dictaphone.

16 Purposive sampling will be used to achieve a sample which includes men and women, patients of  
17 varying activity levels and patients of different ages and disease severity (pain/ number of fractures).  
18 These factors may influence the ability to engage with an exercise programme. Since most research  
19 regarding adherence in osteoporosis has previously been undertaken with women, it also  
20 considered important to capture the views of men within the current study and to capture the  
21 experiences of people with differing physical activity levels prior to the programme. The quality of a  
22 qualitative study is not dependent on its sample size; however, the sample size needs to be  
23 sufficiently large to enable relevant data to be obtained, without being so overly large that detailed  
24 analysis is subsequently prevented [35]. Information about physiotherapists views of delivering the

1 adherence interventions will also be sought. All those who deliver the adherence techniques will be  
2 invited to participate in a focus group.

3 Audio recordings will be listened to, and transcripts read until they become familiar. Data from the  
4 interviews with physiotherapists and participants will be analysed separately to understand the  
5 perspectives of each group. We will use collaborative methods to ensure a strong voice from PPI  
6 members and research rigour. We will use thematic analysis, using the six steps proposed by Braun  
7 and Clarke [36].

#### 8 Patient and Public Involvement

9 The study funding application, intervention development and study materials preparation were  
10 supported by our patient and public involvement members who will be involved across the course of  
11 the study.

#### 12 ETHICS AND DISEMINATION.

13 The study protocol was approved by West of Scotland Research Ethics Committee 4 (Reference  
14 21/WS/0071). The University of Oxford is the sponsor. The trial is registered with the International  
15 Standard Randomised Controlled Trials database ISRCTN reference number 14465704.

16 The protocol has been reported following the Standard Protocol Items: Recommendations for  
17 Interventional Trials (SPIRIT) statement [37]. Results will be published reported following the  
18 Consolidated Standards of Reporting Trials (CONSORT) guidelines [38]. The Template for  
19 Intervention Description and Replication (TIDieR) statement will be used to report the intervention  
20 ensuring replication is possible [39]. Results will be published in a peer reviewed journal with  
21 authorship eligibility according to International Committee of Medical Journal Editors (ICJME)  
22 criteria. Participants will be asked if they wish to have the results shared with them prior to  
23 publication and we will share with those who request this. We plan to publish results in an

1 international peer-reviewed journal and at international rehabilitation and bone health focussed  
2  
3  
4  
5 1 international peer-reviewed journal and at international rehabilitation and bone health focussed  
6 2 conferences.

### 3 **Contributions of Authors:**

4 Karen L Barker: Chief Investigator, Conceived and designed the study, was awarded the funding and  
5 had overall responsibility for the study design and delivery and drafted the manuscript. She is the  
6 guarantor.

7 Jonathan Room: contributed to study design and provided specific content and edited manuscript.  
8 Qualitative lead.

9 Erin Hannink: contributed to study design and provided specific content and edited manuscript

10 Ruth Knight (statistical co-applicant) performed the sample size calculation, prepared randomisation  
11 schedules, planned statistical analysis methods

12 Meredith Newman (Trial Manager), trial design, intervention development, manualisation, training,  
13 supervision, writing and reviewing report.

### 14 **Funding**

15 The study is supported by an independent grant from the Chartered Society of Physiotherapy  
16 Charitable Trust (RP/19/01).

### 17 **Competing Interests**

18 All authors have completed the ICMJE uniform disclosure form at [www.icmje.org/coi\\_disclosure.pdf](http://www.icmje.org/coi_disclosure.pdf)  
19 and declare: no support from any organisation for the submitted work, other than funding  
20 arrangements for the trial described in body of the text; no financial relationships with any  
21 organisations that might have an interest in the submitted work in the previous three years; no  
22 other relationships or activities that could appear to have influenced the submitted work.

## 1 Transparency

2  
3  
4  
5  
6 2 The lead author (KLB) affirms that the manuscript is an honest, accurate and transparent account of  
7  
8 3 the study being reported.  
9

## 10 Figure Legends

### 11 Figure 1: Study Flow Diagram

### 12 Figure 2: Logic Model for intervention

## 13 References

- 14 1. Gibbs JC, MacIntyre NJ, Ponzano M, et al. Exercise for improving outcomes after  
15 2 osteoporotic vertebral fracture. *Cochrane Database Syst Rev.* 2019 Jul 5; 7:  
16 3 CD008618. doi: 10.1002/14651858.
- 17 2. Barker K, Newman M, Stallard N, et al. Physiotherapy Rehabilitation for  
18 3 Osteoporotic Vertebral Fracture: A Randomised Controlled Trial and economic  
19 4 evaluation (PROVE Trial). *Osteoporos Int*, 2019 Nov 12.
- 20 3. Brooke-Wavell K, Skelton D, Barker KL, Clark EM, de Biase S, Arnold S, Paskins Z,  
21 4 Robinson KR, Lewis RM, Tobias JH, Ward KA, Whitney J, Leyland S. Strong, steady  
22 5 and straight: UK consensus statement on physical activity and exercise for  
23 6 osteoporosis. *Br J Sports Med* 2022 May 16 bjsports-2021-104634.
- 24 4. [https://strwebprdmedia.blob.core.windows.net/media/kuphgv1u/ros-guidance-  
25 5 on-managing-symptoms-of-vertebral-fractures-2022.pdf](https://strwebprdmedia.blob.core.windows.net/media/kuphgv1u/ros-guidance-on-managing-symptoms-of-vertebral-fractures-2022.pdf). Accessed 17.08.22
- 26 5. Gold DT, Shipp KM, Pieper CF, et al. Group treatment improves trunk strength and  
27 6 psychological status in older women with vertebral fractures: results of a RCT. *J  
28 7 Am Geriatr Soc* 2004; 52:1471–1478.
- 29 6. Bergström I et al. Back extensor training increases muscle strength in  
30 7 postmenopausal women with osteoporosis, kyphosis and vertebral fractures. *Adv  
31 8 Physiother* 2011; 13:110–117.
- 32 7. Bergland A. et al. Effect of exercise on mobility, balance, and health-related  
33 8 quality of life in osteoporotic women with a history of vertebral fracture: a  
34 9 randomized, controlled trial. *Osteoporos Int.* 2011; 22: 1863-71.

- 1  
2  
3 1 8. Olsen CF, Bergland A. The effect of exercise and education on fear of falling in  
4 2 elderly women with osteoporosis and a history of vertebral fracture: results of a  
5 3 randomized controlled trial. *Osteoporos Int*. 2014; 2: 2017-25.
- 6  
7 4 9. Gibbs JC, McArthur C, Wark J et al. The effect home exercise in older women with  
8 5 vertebral fractures: A pilot randomised controlled trial. *Physical Therapy*. 3 Jan  
9 6 2020 doi.org/10.1093/ptj/pzz188
- 10  
11 7 10. Evstigneeva L, Lesnyak O, Bultink IEM et al Effect of a twelve-month physical  
12 8 exercise program of patients with osteoporotic vertebral fractures: a randomised  
13 9 controlled trial. *Osteoporos Int* 2016 27: 2515-24.
- 14  
15 10 11. Room J, Hannink E, Dawes H, et al. What interventions are used to improve  
16 11 exercise adherence in older people and what behavioural techniques are they  
17 12 based on? *BMJ Open*. 2017; 7(12): e019221.
- 18  
19 13 12. Beavious C. Motivational interviewing to improve treatment adherence. *Joint*  
20 14 *Bone Spine*. 2019 Feb 22: pii: S1297-319X (19)30042-9. doi:  
21 15 10.1016/j.jbspin.2019.02.005.
- 22  
23 16 13. NICE draft guidance on behaviour change URL:  
24 17 [https://www.nice.org.uk/guidance/ph49/documents/behaviour-change-draft-](https://www.nice.org.uk/guidance/ph49/documents/behaviour-change-draft-guidance2)  
25 18 [guidance2](https://www.nice.org.uk/guidance/ph49/documents/behaviour-change-draft-guidance2)(accessed 11th March 2020).
- 26  
27 19 14. Room J, Boulton M, Dawes H, et al. Development of an exercise adherence  
28 20 intervention for older people. The steps taken designing a complex intervention  
29 21 for the AERO trial. *WCPT 2019: PO-J-09-SUN1*
- 30  
31 22 15. Michie S, van Stralen M, West R. The behaviour change wheel: A new method for  
32 23 characterising and designing behaviour change interventions. *Implementation*  
33 24 *Science* 2011, 6:42.
- 34  
35 25 16. Rodrigues IB, Jonathan D, Adachi JD, Beattie5 KA, MacDermid JC. Development  
36 26 and validation of a new tool to measure the facilitators, barriers and preferences  
37 27 to exercise in people with osteoporosis. *BMC Musculoskeletal Disorders* 2017  
38 28 18:540. DOI 10.1186/s12891-017-1914-5.
- 39  
40 29 17. Drummond M, Sculpher M, Torrance G, O'Brien B, Stoddart G. *Methods for the*  
41 30 *economic evaluation of health care programmes*: Oxford University Press; 2005.
- 42  
43 31 18. Podsiadlo, D. and Richardson, S. (1991). "The timed "Up & Go": a test of basic  
44 32 functional mobility for frail elderly persons." *J Am Geriatr Soc* 39(2): 142-148.
- 45  
46 33 19. International Osteoporosis Foundation Quality of life questionnaires QUALEFFO-  
47 34 41. URL: [https://www.osteoporosis.foundation/health-professionals/research-](https://www.osteoporosis.foundation/health-professionals/research-tools/quality-life-questionnaires)  
48 35 [tools/quality-life-questionnaires](https://www.osteoporosis.foundation/health-professionals/research-tools/quality-life-questionnaires) (accessed 30 March 2022).
- 49  
50 36 20. Newman M, Newman R, Hughes T, Vadher K, Barker KL. Is the timed loaded  
51 37 standing test a valid measure of back muscle endurance in people with vertebral  
52 38 osteoporosis? *Osteoporos Int*. 2018; 29:893–905.
- 53  
54 39 21. Greendale GA, Nili NS, Huang MH, Seeger L, Karlamangla AS. The reliability and  
55 40 validity of three non-radiological measures of thoracic kyphosis and their relations  
56 41 to the standing radiological Cobb angle. *Osteoporos Int* 2011; 22:1897–905.

1  
2  
3  
4  
5  
6  
7  
8  
9  
10  
11  
12  
13  
14  
15  
16  
17  
18  
19  
20  
21  
22  
23  
24  
25  
26  
27  
28  
29  
30  
31  
32  
33  
34  
35  
36  
37  
38  
39  
40  
41  
42  
43  
44  
45  
46  
47  
48  
49  
50  
51  
52  
53  
54  
55  
56  
57  
58  
59  
60

22. Jensen, M.P. and Karoly, P. (2011). "Self-report scales and procedures for assessing pain in adults", in Turk, D.C. and Melzack, R. (eds). Handbook of pain assessment, 3rd edition. New York, Guilford Press, 19-44.
23. Weiner DK, Duncan PW et al. Functional reach: a marker of physical frailty. *J Am Geriatr Soc* 1992; 40(3):203-7.
24. Steffen TM, Hacker TA, Mollinger L. Age- and gender-related test performance in community-dwelling elderly people: Six-Minute Walk Test, Berg Balance Scale, Timed Up and Go Test, and gait speeds. *Phys Ther* 2002; 82:128-37.
25. Delbaere K, Close JCT et al. The falls efficacy scale international (FES-I). A comprehensive longitudinal validation study. *Age and Ageing* 2010; 39: 201-16.
26. Abizanda P, Navarro JL et al. Validity and usefulness of handheld- dynamometry for measuring muscle strength in community-dwelling older persons. *Arch Gerontol Geriatr*. 2012; 54(1): 21-7.
27. Resnick B and Jenkins LS. Testing the reliability and validity of the self-efficacy for exercise scale. *Nurs Res* 49 (3): 154-159.
28. Newman-Beinart NA et al. The development and initial psychometric evaluation of a measure assessing adherence to prescribed exercise: the Exercise Adherence Rating Scale (EARS). *Physiotherapy* 103 (2017) 180-85.
29. Herdman M, Gudex C, Lloyd A et al. Development and preliminary testing of the new five-level version of the EQ-5D-5L (EQ-5D-5L). *Qual Life Res* 2011; 20 (10): 1727-36.28.
30. Wright A, Cook C, Baxter G, et al. A comparison of 3 methodological approaches to defining major clinically important improvements of 4 performance measures in patients with hip osteoarthritis. *J Orthop Sport Phys*. 2011; 41: 319 -27.
31. Schulz KF, Altman DG, Moher D, for the CONSORT Group. CONSORT 2010 Statement: updated guidelines for reporting parallel group randomised trials. *BMC Trials*. 2010; 11:32.
32. Calvert M, Blazeby J, Altman DG, et al. Reporting of patient-reported outcomes in randomized trials: the CONSORT PRO Extension. *JAMA*. 2013;309(8):814-22.
33. Hannink E, Newman M, Barker KL. Does thoracic kyphosis severity predict response to physiotherapy rehabilitation in patients with osteoporotic vertebral fracture? A secondary analysis of the PROVE RCT. *Physiotherapy* Feb 17, 2022,
34. Drummond M, Sculpher M, Torrance G, O'Brien B, Stoddart G. *Methods for the economic evaluation of health care programmes*: Oxford University Press; 2005.
35. Sandelowski, M., *Sample size in qualitative research*. *Research in Nursing and Health*, 1995. 18(2): p. 179-183.
36. Braun V, Clarke V. What can "thematic analysis" offer health and wellbeing researchers? *Int J Qual Stud Health Well-being*. 2014; 9:26152.
37. Chan A-W, Tetzlaff JM, Gotzsche PC et al. SPIRIT 2013 explanation and elaboration: guidance for protocols of clinical trials. *BMJ* 2013;346: e7586.



- 1  
2  
3 1 38. Schulz KF, Altman DG, Moher D et al. CONSORT 2010 statement: updated  
4 2 guidelines for reporting parallel group randomised trials. BMJ 2010;340:c332.  
5  
6 3 39. Hoffmann TC, Glasziou PP, Boutron I et al. Better reporting of interventions:  
7 4 template for intervention description and replication (TIDieR) checklist and guide.  
8 5 BMJ 2014; 348: g1687.  
9  
10 6  
11  
12  
13  
14  
15  
16  
17  
18  
19  
20  
21  
22  
23  
24  
25  
26  
27  
28  
29  
30  
31  
32  
33  
34  
35  
36  
37  
38  
39  
40  
41  
42  
43  
44  
45  
46  
47  
48  
49  
50  
51  
52  
53  
54  
55  
56  
57  
58  
59  
60

For peer review only



Qualitative Interviews n =15-20 participants  
Focus group Physiotherapists

1  
2  
3  
4  
5  
6  
7  
8  
9  
10  
11  
12  
13  
14  
15  
16  
17  
18  
19  
20  
21  
22  
23  
24  
25  
26  
27  
28  
29  
30  
31  
32  
33  
34  
35  
36  
37  
38  
39  
40  
41

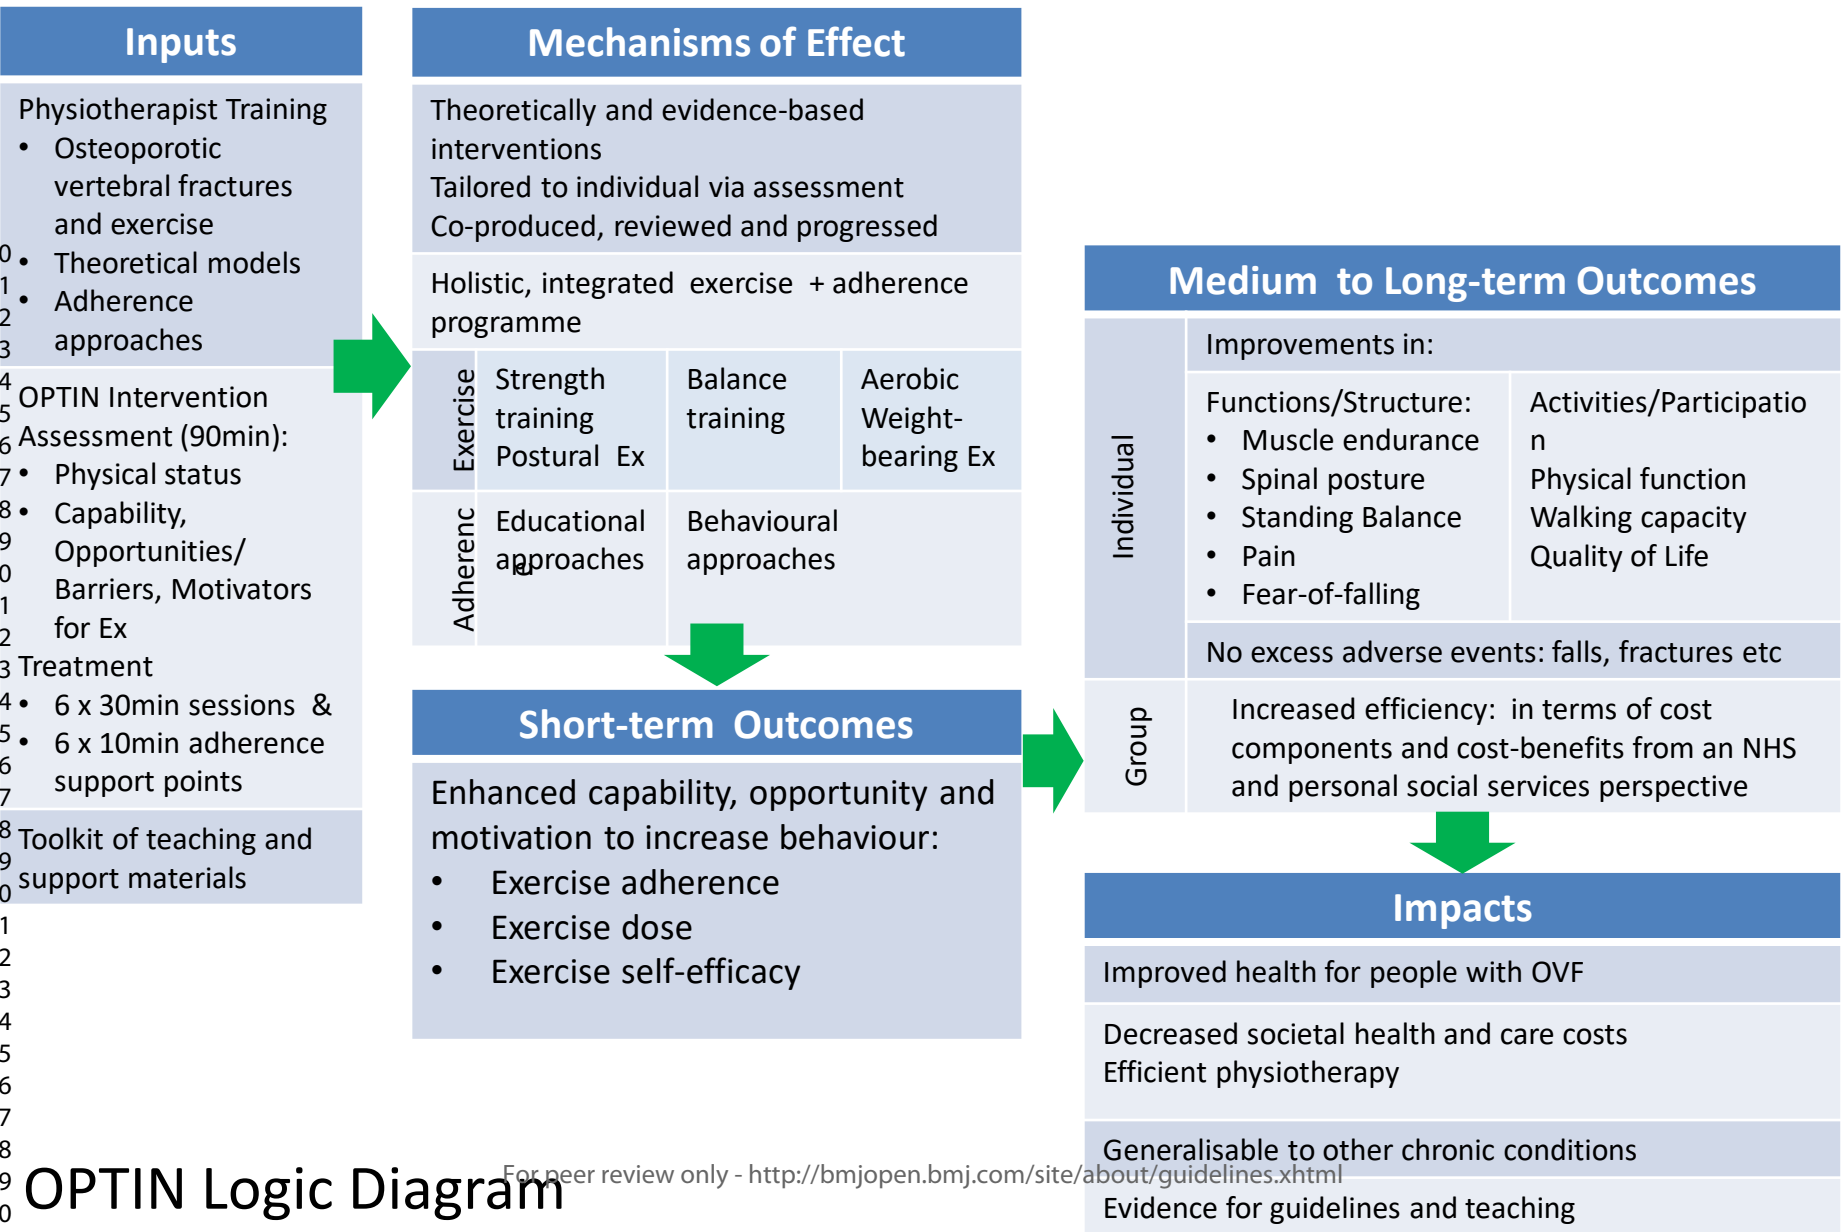

**OPTIN Logic Diagram**

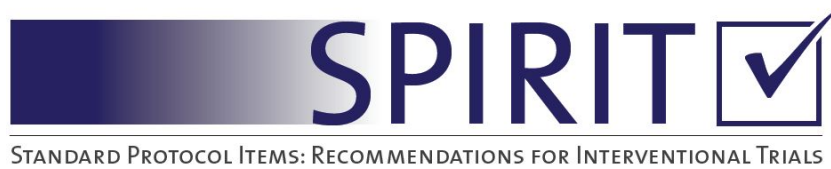

STANDARD PROTOCOL ITEMS: RECOMMENDATIONS FOR INTERVENTIONAL TRIALS

SPIRIT 2013 Checklist: Recommended items to address in a clinical trial protocol and related documents\*

| Section/item                      | Item No | Description                                                                                                                                                                                                                                                                              |
|-----------------------------------|---------|------------------------------------------------------------------------------------------------------------------------------------------------------------------------------------------------------------------------------------------------------------------------------------------|
| <b>Administrative information</b> |         |                                                                                                                                                                                                                                                                                          |
| Title                             | 1       | Descriptive title identifying the study design, population, interventions, and, if applicable, trial acronym <b>Title Page Lines 1-3</b>                                                                                                                                                 |
| Trial registration                | 2a      | Trial identifier and registry name. If not yet registered, name of intended registry <b>Page 3 Line 21</b>                                                                                                                                                                               |
|                                   | 2b      | All items from the World Health Organization Trial Registration Data Set                                                                                                                                                                                                                 |
| Protocol version                  | 3       | Date and version identifier <b>Page 3 Line 22</b>                                                                                                                                                                                                                                        |
| Funding                           | 4       | Sources and types of financial, material, and other support <b>Page 23 lines 9/10</b>                                                                                                                                                                                                    |
| Roles and responsibilities        | 5a      | Names, affiliations, and roles of protocol contributors <b>Title page and Page 22/23</b>                                                                                                                                                                                                 |
|                                   | 5b      | Name and contact information for the trial sponsor <b>Page 19 Line 12</b>                                                                                                                                                                                                                |
|                                   | 5c      | Role of study sponsor and funders, if any, in study design; collection, management, analysis, and interpretation of data; writing of the report; and the decision to submit the report for publication, including whether they will have ultimate authority over any of these activities |
|                                   | 5d      | Composition, roles, and responsibilities of the coordinating centre, steering committee, endpoint adjudication committee, data management team, and other individuals or groups overseeing the trial, if applicable (see Item 21a for data monitoring committee)                         |
| <b>Introduction</b>               |         |                                                                                                                                                                                                                                                                                          |
| Background and rationale          | 6a      | Description of research question and justification for undertaking the trial, including summary of relevant studies (published and unpublished) examining benefits and harms for each intervention <b>P5-6</b>                                                                           |
|                                   | 6b      | Explanation for choice of comparators <b>P6</b>                                                                                                                                                                                                                                          |
| Objectives                        | 7       | Specific objectives or hypotheses <b>P6</b>                                                                                                                                                                                                                                              |

1  
2  
3  
4  
5  
6  
7  
8  
9  
10  
11  
12  
13  
14  
15  
16  
17  
18  
19  
20  
21  
22  
23  
24  
25  
26  
27  
28  
29  
30  
31  
32  
33  
34  
35  
36  
37  
38  
39  
40  
41  
42  
43  
44  
45  
46  
47  
48  
49  
50  
51  
52  
53  
54  
55  
56  
57  
58  
59  
60

|              |   |                                                                                                                                                                                                                           |
|--------------|---|---------------------------------------------------------------------------------------------------------------------------------------------------------------------------------------------------------------------------|
| Trial design | 8 | Description of trial design including type of trial (eg, parallel group, crossover, factorial, single group), allocation ratio, and framework (eg, superiority, equivalence, noninferiority, exploratory) <b>P6 L22-3</b> |
|--------------|---|---------------------------------------------------------------------------------------------------------------------------------------------------------------------------------------------------------------------------|

### **Methods: Participants, interventions, and outcomes**

|               |   |                                                                                                                                                                                                  |
|---------------|---|--------------------------------------------------------------------------------------------------------------------------------------------------------------------------------------------------|
| Study setting | 9 | Description of study settings (eg, community clinic, academic hospital) and list of countries where data will be collected. Reference to where list of study sites can be obtained <b>P7 L10</b> |
|---------------|---|--------------------------------------------------------------------------------------------------------------------------------------------------------------------------------------------------|

|                      |    |                                                                                                                                                                                                          |
|----------------------|----|----------------------------------------------------------------------------------------------------------------------------------------------------------------------------------------------------------|
| Eligibility criteria | 10 | Inclusion and exclusion criteria for participants. If applicable, eligibility criteria for study centres and individuals who will perform the interventions (eg, surgeons, psychotherapists) <b>P7-8</b> |
|----------------------|----|----------------------------------------------------------------------------------------------------------------------------------------------------------------------------------------------------------|

|               |     |                                                                                                                                          |
|---------------|-----|------------------------------------------------------------------------------------------------------------------------------------------|
| Interventions | 11a | Interventions for each group with sufficient detail to allow replication, including how and when they will be administered <b>P10-11</b> |
|---------------|-----|------------------------------------------------------------------------------------------------------------------------------------------|

|  |     |                                                                                                                                                                                                           |
|--|-----|-----------------------------------------------------------------------------------------------------------------------------------------------------------------------------------------------------------|
|  | 11b | Criteria for discontinuing or modifying allocated interventions for a given trial participant (eg, drug dose change in response to harms, participant request, or improving/worsening disease) <b>n/a</b> |
|--|-----|-----------------------------------------------------------------------------------------------------------------------------------------------------------------------------------------------------------|

|  |     |                                                                                                                                                                 |
|--|-----|-----------------------------------------------------------------------------------------------------------------------------------------------------------------|
|  | 11c | Strategies to improve adherence to intervention protocols, and any procedures for monitoring adherence (eg, drug tablet return, laboratory tests) <b>p10/11</b> |
|--|-----|-----------------------------------------------------------------------------------------------------------------------------------------------------------------|

|  |     |                                                                                                          |
|--|-----|----------------------------------------------------------------------------------------------------------|
|  | 11d | Relevant concomitant care and interventions that are permitted or prohibited during the trial <b>p12</b> |
|--|-----|----------------------------------------------------------------------------------------------------------|

|          |    |                                                                                                                                                                                                                                                                                                                                                                                              |
|----------|----|----------------------------------------------------------------------------------------------------------------------------------------------------------------------------------------------------------------------------------------------------------------------------------------------------------------------------------------------------------------------------------------------|
| Outcomes | 12 | Primary, secondary, and other outcomes, including the specific measurement variable (eg, systolic blood pressure), analysis metric (eg, change from baseline, final value, time to event), method of aggregation (eg, median, proportion), and time point for each outcome. Explanation of the clinical relevance of chosen efficacy and harm outcomes is strongly recommended <b>p12-14</b> |
|----------|----|----------------------------------------------------------------------------------------------------------------------------------------------------------------------------------------------------------------------------------------------------------------------------------------------------------------------------------------------------------------------------------------------|

|                      |    |                                                                                                                                                                                                 |
|----------------------|----|-------------------------------------------------------------------------------------------------------------------------------------------------------------------------------------------------|
| Participant timeline | 13 | Time schedule of enrolment, interventions (including any run-ins and washouts), assessments, and visits for participants. A schematic diagram is highly recommended (see Figure) <b>Table 1</b> |
|----------------------|----|-------------------------------------------------------------------------------------------------------------------------------------------------------------------------------------------------|

|             |    |                                                                                                                                                                                                  |
|-------------|----|--------------------------------------------------------------------------------------------------------------------------------------------------------------------------------------------------|
| Sample size | 14 | Estimated number of participants needed to achieve study objectives and how it was determined, including clinical and statistical assumptions supporting any sample size calculations <b>P15</b> |
|-------------|----|--------------------------------------------------------------------------------------------------------------------------------------------------------------------------------------------------|

|             |    |                                                                                               |
|-------------|----|-----------------------------------------------------------------------------------------------|
| Recruitment | 15 | Strategies for achieving adequate participant enrolment to reach target sample size <b>P8</b> |
|-------------|----|-----------------------------------------------------------------------------------------------|

### **Methods: Assignment of interventions (for controlled trials)**

Allocation:

|    |                |     |                                                                         |
|----|----------------|-----|-------------------------------------------------------------------------|
| 1  |                |     |                                                                         |
| 2  | Sequence       | 16a | Method of generating the allocation sequence (eg, computer-             |
| 3  | generation     |     | generated random numbers), and list of any factors for stratification.  |
| 4  |                |     | To reduce predictability of a random sequence, details of any planned   |
| 5  |                |     | restriction (eg, blocking) should be provided in a separate document    |
| 6  |                |     | that is unavailable to those who enrol participants or assign           |
| 7  |                |     | interventions <b>P9</b>                                                 |
| 8  |                |     |                                                                         |
| 9  |                |     |                                                                         |
| 10 | Allocation     | 16b | Mechanism of implementing the allocation sequence (eg, central          |
| 11 | concealment    |     | telephone; sequentially numbered, opaque, sealed envelopes),            |
| 12 | mechanism      |     | describing any steps to conceal the sequence until interventions are    |
| 13 |                |     | assigned <b>p9</b>                                                      |
| 14 |                |     |                                                                         |
| 15 | Implementation | 16c | Who will generate the allocation sequence, who will enrol participants, |
| 16 |                |     | and who will assign participants to interventions <b>P9</b>             |
| 17 |                |     |                                                                         |
| 18 |                |     |                                                                         |
| 19 | Blinding       | 17a | Who will be blinded after assignment to interventions (eg, trial        |
| 20 | (masking)      |     | participants, care providers, outcome assessors, data analysts), and    |
| 21 |                |     | how <b>P 9</b>                                                          |
| 22 |                |     |                                                                         |
| 23 |                | 17b | If blinded, circumstances under which unblinding is permissible, and    |
| 24 |                |     | procedure for revealing a participant's allocated intervention during   |
| 25 |                |     | the trial <b>n/a</b>                                                    |
| 26 |                |     |                                                                         |
| 27 |                |     |                                                                         |

### **Methods: Data collection, management, and analysis**

|    |                 |     |                                                                          |
|----|-----------------|-----|--------------------------------------------------------------------------|
| 28 |                 |     |                                                                          |
| 29 |                 |     |                                                                          |
| 30 | Data collection | 18a | Plans for assessment and collection of outcome, baseline, and other      |
| 31 | methods         |     | trial data, including any related processes to promote data quality (eg, |
| 32 |                 |     | duplicate measurements, training of assessors) and a description of      |
| 33 |                 |     | study instruments (eg, questionnaires, laboratory tests) along with      |
| 34 |                 |     | their reliability and validity, if known. Reference to where data        |
| 35 |                 |     | collection forms can be found, if not in the protocol <b>p10</b>         |
| 36 |                 |     |                                                                          |
| 37 |                 |     |                                                                          |
| 38 |                 | 18b | Plans to promote participant retention and complete follow-up,           |
| 39 |                 |     | including list of any outcome data to be collected for participants who  |
| 40 |                 |     | discontinue or deviate from intervention protocols                       |
| 41 |                 |     |                                                                          |
| 42 | Data            | 19  | Plans for data entry, coding, security, and storage, including any       |
| 43 | management      |     | related processes to promote data quality (eg, double data entry;        |
| 44 |                 |     | range checks for data values). Reference to where details of data        |
| 45 |                 |     | management procedures can be found, if not in the protocol               |
| 46 |                 |     |                                                                          |
| 47 |                 |     |                                                                          |
| 48 | Statistical     | 20a | Statistical methods for analysing primary and secondary outcomes.        |
| 49 | methods         |     | Reference to where other details of the statistical analysis plan can be |
| 50 |                 |     | found, if not in the protocol <b>P15-6</b>                               |
| 51 |                 |     |                                                                          |
| 52 |                 | 20b | Methods for any additional analyses (eg, subgroup and adjusted           |
| 53 |                 |     | analyses) <b>n/a</b>                                                     |
| 54 |                 |     |                                                                          |
| 55 |                 | 20c | Definition of analysis population relating to protocol non-adherence     |
| 56 |                 |     | (eg, as randomised analysis), and any statistical methods to handle      |
| 57 |                 |     | missing data (eg, multiple imputation) <b>P15-17</b>                     |
| 58 |                 |     |                                                                          |
| 59 |                 |     |                                                                          |
| 60 |                 |     |                                                                          |

## Methods: Monitoring

|                 |     |                                                                                                                                                                                                                                                                                                                                                  |
|-----------------|-----|--------------------------------------------------------------------------------------------------------------------------------------------------------------------------------------------------------------------------------------------------------------------------------------------------------------------------------------------------|
| Data monitoring | 21a | Composition of data monitoring committee (DMC); summary of its role and reporting structure; statement of whether it is independent from the sponsor and competing interests; and reference to where further details about its charter can be found, if not in the protocol. Alternatively, an explanation of why a DMC is not needed <b>n/a</b> |
|                 | 21b | Description of any interim analyses and stopping guidelines, including who will have access to these interim results and make the final decision to terminate the trial <b>n/a</b>                                                                                                                                                               |
| Harms           | 22  | Plans for collecting, assessing, reporting, and managing solicited and spontaneously reported adverse events and other unintended effects of trial interventions or trial conduct <b>P14-15</b>                                                                                                                                                  |
| Auditing        | 23  | Frequency and procedures for auditing trial conduct, if any, and whether the process will be independent from investigators and the sponsor                                                                                                                                                                                                      |

## Ethics and dissemination

|                               |     |                                                                                                                                                                                                                                              |
|-------------------------------|-----|----------------------------------------------------------------------------------------------------------------------------------------------------------------------------------------------------------------------------------------------|
| Research ethics approval      | 24  | Plans for seeking research ethics committee/institutional review board (REC/IRB) approval <b>P22</b>                                                                                                                                         |
| Protocol amendments           | 25  | Plans for communicating important protocol modifications (eg, changes to eligibility criteria, outcomes, analyses) to relevant parties (eg, investigators, REC/IRBs, trial participants, trial registries, journals, regulators) <b>P 19</b> |
| Consent or assent             | 26a | Who will obtain informed consent or assent from potential trial participants or authorised surrogates, and how (see Item 32) <b>P8</b>                                                                                                       |
|                               | 26b | Additional consent provisions for collection and use of participant data and biological specimens in ancillary studies, if applicable <b>n/a</b>                                                                                             |
| Confidentiality               | 27  | How personal information about potential and enrolled participants will be collected, shared, and maintained in order to protect confidentiality before, during, and after the trial                                                         |
| Declaration of interests      | 28  | Financial and other competing interests for principal investigators for the overall trial and each study site <b>P23</b>                                                                                                                     |
| Access to data                | 29  | Statement of who will have access to the final trial dataset, and disclosure of contractual agreements that limit such access for investigators                                                                                              |
| Ancillary and post-trial care | 30  | Provisions, if any, for ancillary and post-trial care, and for compensation to those who suffer harm from trial participation <b>n/a</b>                                                                                                     |

- 1  
2  
3  
4  
5  
6  
7  
8  
9  
10  
11  
12  
13
- |                      |     |                                                                                                                                                                                                                                                                                                |
|----------------------|-----|------------------------------------------------------------------------------------------------------------------------------------------------------------------------------------------------------------------------------------------------------------------------------------------------|
| Dissemination policy | 31a | Plans for investigators and sponsor to communicate trial results to participants, healthcare professionals, the public, and other relevant groups (eg, via publication, reporting in results databases, or other data sharing arrangements), including any publication restrictions <b>P19</b> |
|                      | 31b | Authorship eligibility guidelines and any intended use of professional writers <b>P19</b>                                                                                                                                                                                                      |
|                      | 31c | Plans, if any, for granting public access to the full protocol, participant-level dataset, and statistical code                                                                                                                                                                                |

## 14 Appendices

- 15  
16  
17  
18  
19  
20  
21  
22
- |                            |    |                                                                                                                                                                                                |
|----------------------------|----|------------------------------------------------------------------------------------------------------------------------------------------------------------------------------------------------|
| Informed consent materials | 32 | Model consent form and other related documentation given to participants and authorised surrogates                                                                                             |
| Biological specimens       | 33 | Plans for collection, laboratory evaluation, and storage of biological specimens for genetic or molecular analysis in the current trial and for future use in ancillary studies, if applicable |

---

23  
24  
25  
26  
27  
28  
29  
30  
31  
32  
33  
34  
35  
36  
37  
38  
39  
40  
41  
42  
43  
44  
45  
46  
47  
48  
49  
50  
51  
52  
53  
54  
55  
56  
57  
58  
59  
60

\*It is strongly recommended that this checklist be read in conjunction with the SPIRIT 2013 Explanation & Elaboration for important clarification on the items. Amendments to the protocol should be tracked and dated. The SPIRIT checklist is copyrighted by the SPIRIT Group under the Creative Commons "[Attribution-NonCommercial-NoDerivs 3.0 Unported](https://creativecommons.org/licenses/by-nc-nd/3.0/)" license.



# BMJ Open

**Physiotherapy exercise rehabilitation with tailored exercise adherence support for people with osteoporosis and vertebral fractures: Protocol for a randomised controlled trial – the Osteoporosis Tailored exercise adherence intervention (OPTIN) study.**

|                                 |                                                                                                                                                                                                                                                                                                                                                                                                                                                                                                                                               |
|---------------------------------|-----------------------------------------------------------------------------------------------------------------------------------------------------------------------------------------------------------------------------------------------------------------------------------------------------------------------------------------------------------------------------------------------------------------------------------------------------------------------------------------------------------------------------------------------|
| Journal:                        | <i>BMJ Open</i>                                                                                                                                                                                                                                                                                                                                                                                                                                                                                                                               |
| Manuscript ID                   | bmjopen-2022-064637.R2                                                                                                                                                                                                                                                                                                                                                                                                                                                                                                                        |
| Article Type:                   | Protocol                                                                                                                                                                                                                                                                                                                                                                                                                                                                                                                                      |
| Date Submitted by the Author:   | 26-Aug-2022                                                                                                                                                                                                                                                                                                                                                                                                                                                                                                                                   |
| Complete List of Authors:       | Barker, Karen L.; University of Oxford, Nuffield Department of Orthopaedics, Rheumatology and Musculoskeletal Sciences Room, Jonathan; Oxford University Hospitals NHS Foundation Trust, Physiotherapy Research Unit<br>Knight, Ruth; University of Oxford, Nuffield Department of Orthopaedics, Rheumatology and Musculoskeletal Sciences<br>Hannink, Erin; Oxford University Hospitals NHS Foundation Trust, Physiotherapy Research Unit<br>Newman, Meredith; Oxford University Hospitals NHS Foundation Trust, Physiotherapy Research Unit |
| <b>Primary Subject Heading</b>: | Rheumatology                                                                                                                                                                                                                                                                                                                                                                                                                                                                                                                                  |
| Secondary Subject Heading:      | Rehabilitation medicine                                                                                                                                                                                                                                                                                                                                                                                                                                                                                                                       |
| Keywords:                       | Back pain < ORTHOPAEDIC & TRAUMA SURGERY, RHEUMATOLOGY, REHABILITATION MEDICINE                                                                                                                                                                                                                                                                                                                                                                                                                                                               |
|                                 |                                                                                                                                                                                                                                                                                                                                                                                                                                                                                                                                               |

SCHOLARONE™  
Manuscripts

1  
2  
3  
4 1 **Physiotherapy exercise rehabilitation with tailored exercise adherence support for people with**  
5 **osteoporosis and vertebral fractures: Protocol for a randomised controlled trial – the Osteoporosis**  
6 **2 Tailored exercise adherence intervention (OPTIN) study.**  
7  
8  
9

10 4 Authors: Karen L Barker 1,2 \*, Jonathan Room 1, Ruth Knight 3, Erin Hannink 1, Meredith  
11 Newman 1.  
12  
13

14  
15 6 1. Physiotherapy Research Unit, Nuffield Orthopaedic Centre, Oxford University  
16 Hospitals Foundation Trust, Oxford, OX3 7HE, UK.  
17

18  
19 8 2. Nuffield Department of Orthopaedics, Rheumatology and Musculoskeletal Sciences,  
20 University of Oxford, OX3 7LD.  
21

22  
23  
24 10 3. Oxford Clinical Trials Research Unit (OCTRU), Centre for Statistics in Medicine,  
25 Nuffield Department of Orthopaedics, Rheumatology and Musculoskeletal Sciences,  
26 University of Oxford, Oxford, UK.  
27  
28

29  
30 13 Authors: job title and affiliations  
31

32  
33 14 Karen L Barker, Professor of Physiotherapy 1,2\*, ORCID 0000-0001-9363-0383  
34

35  
36 15 Jonathan Room, Research Physiotherapist1, ORCID 0000-0002-1257-834X  
37

38  
39 16 Ruth Knight, Senior Medical Statistician 3, ORCID 0000-0001-6810-2845  
40

41  
42 17 Erin Hannink, Research Physiotherapist 1. ORCID 0000-0002-1422-4625  
43

44  
45 18 Meredith Newman, Research Physiotherapist 1 ORCID 0000-0002-7228-2022  
46

47  
48 19 \* Please direct correspondence to:  
49

50  
51 20 Professor Karen Barker  
52

53  
54 21 Physiotherapy Research Unit, Nuffield Orthopaedic Centre, Oxford University Hospitals NHS  
55 Foundation Trust, Windmill Road, Oxford, OX3 7LD, UK.  
56

57  
58 23 [Karen.barker@ouh.nhs.uk](mailto:Karen.barker@ouh.nhs.uk)  
59

60  
24 Keywords: Physical therapy modalities; exercise, osteoporosis, spine, rehabilitation

1  
2  
3  
4  
5  
6  
7  
8  
9  
10  
11  
12  
13  
14  
15  
16  
17  
18  
19  
20  
21  
22  
23  
24  
25  
26  
27  
28  
29  
30  
31  
32  
33  
34  
35  
36  
37  
38  
39  
40  
41  
42  
43  
44  
45  
46  
47  
48  
49  
50  
51  
52  
53  
54  
55  
56  
57  
58  
59  
60

1 Word count 4011.

For peer review only

## 1           2           3           4           5           6           7           8           9           10           11           12           13           14           15           16           17           18           19           20           21           22           23           24           25           26           27           28           29           30           31           32           33           34           35           36           37           38           39           40           41           42           43           44           45           46           47           48           49           50           51           52           53           54           55           56           57           58           59           60

### 1           2           3           4           5           6           7           8           9           10           11           12           13           14           15           16           17           18           19           20           21           22           23           24           25           26           27           28           29           30           31           32           33           34           35           36           37           38           39           40           41           42           43           44           45           46           47           48           49           50           51           52           53           54           55           56           57           58           59           60

**1           2           3           4           5           6           7           8           9           10           11           12           13           14           15           16           17           18           19           20           21           22           23           24           25           26           27           28           29           30           31           32           33           34           35           36           37           38           39           40           41           42           43           44           45           46           47           48           49           50           51           52           53           54           55           56           57           58           59           60**

**Introduction:** Vertebral fragility fractures affect at least 20% of the older population in the UK. Best practice guidelines recommend the use of exercise to slow the rate of bone loss, to maintain muscle strength and physical function, and to prevent falls and further fractures. However, treatment effects are often small and difficult to sustain and adherence, or the extent to which patients engage in treatment, has been identified as an important issue by many studies. Our hypothesis is that integrating adherence intervention strategies with an exercise intervention will be beneficial. We will compare physiotherapy exercise rehabilitation with adherence support versus physiotherapy exercise rehabilitation alone in terms of effects on (a) physical function, quality of life, and fear of falling and (b) exercise self-efficacy and adherence.

**Methods and Analysis:** A multicentre, two-arm, parallel group, superiority randomised controlled trial (RCT) with blinded assessments at baseline (0) and 4, 8, and 12 months, with a nested qualitative study and health economic analysis. 116 participants will be allocated to either (i) out-patient physiotherapy which will include a musculoskeletal assessment and treatment including balance, posture, strength training and low impact weight-bearing exercises over 16 weeks; or (ii) Opt-In intervention. This includes standard physiotherapy as above plus an additional, integrated assessment interview (30mins) and 60 minutes of adherence support spread over the subsequent 16 weeks.

**Ethics and Dissemination:** The study protocol was approved by West of Scotland Research Ethics Committee 4 (21/WS/0071). Trial registration number ISRCTN 14465704. The paper is based on Protocol v4.

### **Strengths and Limitations of this study**

- The Physiotherapy exercise rehabilitation with tailored exercise adherence support for people with osteoporosis and vertebral fractures (Opt-In) study is a multicentre randomised controlled trial with an embedded qualitative study and economic evaluation.
- It will recruit from at least six NHS hospitals.
- The intervention addresses adherence which is an important confounder in many trials of physiotherapy.
- The intervention was developed using current research evidence, input from expert clinicians, researchers and patient / public representatives.
- Due to the nature of the interventions the physiotherapists delivering the treatments and the participants cannot be blinded.

## 1 Introduction

2 Vertebral fragility fractures (VFFs) affect at least 20% of the older population in the UK and present a  
3 significant health and economic burden [1, 2]. They are associated with back pain, fatigue, low  
4 mood, restrictions in physical function and activities of daily living, and marked, persistent  
5 reductions in quality of life (QoL) [1, 2]. Without treatment, progression and functional decline are  
6 expected. Conservative treatment for osteoporosis includes bone protective medications and  
7 lifestyle adaptations. Guidelines recommend people with osteoporosis keep active and exercise to  
8 slow the rate of bone loss, to maintain muscle strength and physical function and to prevent falls  
9 and further fractures [3,4]. Exercise prescription with multi-component exercise programmes that  
10 include postural, balance, aerobic weight-bearing and strength exercises are recommended [1-3].

11 Trials evaluating exercise in people with VFFs have reported benefits across a range of outcomes [1,  
12 2, 5-10], with a recent Cochrane review concluding there is moderate-quality evidence that exercise  
13 improves physical function [1]. However, treatment effects are often small and difficult to sustain  
14 [1, 2, 5-10]. For example, in the PROVE trial, significant, clinically relevant benefits to back muscle  
15 endurance, balance, walking capacity and physical function following physiotherapy exercise at 4  
16 months post-randomisation did not persist at 12 months [2]. Adherence, or the extent to which  
17 patients engage in treatment, has been identified as an important issue by many studies [1, 2, 5-6,  
18 9]. Partial adherence or non-adherence is associated with worse outcomes and conversely, higher  
19 adherence with better outcomes [1, 2, 5-10].

20 Multiple factors affect exercise adherence in older people with chronic health conditions including  
21 osteoporosis [11, 12]. These include low exercise self-efficacy, low motivation, depression,  
22 insufficient exercise knowledge or skill, physical ability, negative views about treatment and exercise  
23 programme design [11,12]. Considering this complexity, interventions to support adherence that  
24 recognize personal barriers and facilitators to exercise and that can draw upon multiple adherence  
25 techniques are recommended [12, 13].

1  
2  
3 1 Behavioural approaches can include interventions that support exercise through providing additional  
4  
5 2 monitoring, interventions that aim to alter thinking patterns that contribute to non-adherence and  
6  
7 3 ones that strengthen behaviours that support adherence [12]. Motivational interviewing is a  
8  
9  
10 4 collaborative process that explores potential ambivalence, obstacles and facilitators surrounding  
11  
12 5 behaviour change [6]. There is evidence that additional monitoring, prompts and feedback can  
13  
14 6 benefit adherence in older adults e.g., via telephone call/ text messages, wearable activity monitors  
15  
16 7 or by enriching environmental cues [1]. Incorporating exercise into everyday routines can make it  
17  
18 8 easier to initiate and sustain and creating 'Exercise Action Plans' that specify when, where and how  
19  
20 9 exercises are undertaken can support this process [1, 13]. Using an intervention mapping approach,  
21  
22  
23 10 we developed an exercise adherence intervention underpinned theoretically by the Capability,  
24  
25 11 Opportunity, Motivation - Behaviour (COM-B) behaviour change model [14, 15].  
26  
27  
28

## 29 12 **Aims**

30  
31  
32 13 The aims of this study are:

- 33  
34  
35 14 • To compare physiotherapy exercise rehabilitation with adherence support with  
36  
37 15 physiotherapy exercise rehabilitation alone in terms of effects on: (a) physical function,  
38  
39 16 quality of life, and fear of falling and (b) exercise self-efficacy and adherence.  
40  
41 17 • To explore patient and physiotherapist views of the intervention and of adhering to exercise.  
42  
43  
44 18 • To understand if physiotherapy exercise rehabilitation with adherence support is cost-  
45  
46 19 effective.  
47  
48

## 49 20 **METHODS AND ANALYSES**

### 50 51 52 21 Study design

53  
54  
55 22 A multicentre, two-arm, parallel group, superiority randomised controlled trial (RCT) with blinded  
56  
57 23 assessments at baseline (0) and 4, 8, and 12 months following randomisation, with a nested  
58  
59 24 qualitative study and health economic analysis. Participants will be allocated to either (i) outpatient  
60

1 physiotherapy which will include a musculoskeletal assessment and 6 treatment sessions over 16  
2 weeks based on the current best practice guidance from the Royal Osteoporosis Society; or (ii) the  
3 Opt-In intervention. This includes outpatient physiotherapy as described above, plus an additional,  
4 integrated assessment interview (30mins) and 60 minutes of adherence support spread over the  
5 subsequent treatment period of 16 weeks as prescribed by the physiotherapist in collaboration with  
6 the participant. Sessions in both arms can be in-person or virtually via video-call/ telephone as  
7 agreed between participant and therapist (**Figure 1**).

8 The trial started recruitment of patients in August 2021 and will continue recruiting until June 2023.

### 9 Setting

10 At least six National Health Service (NHS) hospitals and their related physiotherapy services.

### 11 Study Participants

12 Adults aged 55 years or over who have a diagnosis of at least one previous osteoporotic vertebral  
13 fracture and back pain.

### 14 Eligibility

#### 15 Inclusion Criteria

16 Participants may enter the study if they meet ALL the following criteria:

- 17 • Men and women  $\geq 55$  years: all women must be at least 1 year post-menopausal.
- 18 • One or more VFFs confirmed by radiography, X-Ray, MRI, CT or DEXA scan, people with VFF  
19 of any severity and at any time-point post-fracture are eligible.
- 20 • They must have had an episode of back pain in the previous 12 months.
- 21 • All must be able to walk at least 10 metres independently with or without a walking aid.

1  
2  
3 1 Exclusion Criteria  
4  
5

6 2 Participants may not enter the study if ANY of the following apply:  
7  
8

- 9 3 • Current conditions that would make participating in physiotherapy or exercise unsafe or  
10  
11 4 confound results. This includes those with significant neurological and psychiatric conditions,  
12  
13 5 severe unstable cardiovascular or pulmonary disease.  
14  
15  
16 6 • Bone loss secondary to other metabolic disorders, diseases or medication e.g., rheumatoid  
17  
18 7 arthritis, anorexia, cancer, coeliac disease, steroid use.  
19  
20  
21 8 • Individuals whose primary problem is back pain that involves pain radiating into the lower  
22  
23 9 limbs.  
24  
25  
26 10 • Vertebroplasty, facet joint injection or physiotherapy within past 12 weeks.  
27  
28  
29

30  
31 11 Recruitment  
32

33 12 A member of the patient's direct care team will identify potential participants with VFFs via clinic  
34  
35 13 lists and electronic medical records from relevant metabolic bone clinics, radiology clinics (DEXA),  
36  
37 14 physiotherapy referral lists, and from Rheumatology clinics.  
38  
39  
40

41 15 Screening and eligibility assessment  
42  
43

44 16 Potential participants, who respond to an invitation letter will be contacted by telephone to discuss  
45  
46 17 the study further, to check eligibility and to answer any questions. Patients who do not meet the  
47  
48 18 eligibility criteria or who do not wish to participate will receive standard NHS treatment. We will  
49  
50 19 record the age and gender of these patients to assess the generalisability of those recruited.  
51  
52  
53

54 20 Consent  
55  
56

57 21 Participants who are eligible and willing to proceed will be approached for informed consent.; they  
58  
59 22 and the researcher will sign and date a consent form. For participants who are recruited to the  
60



1  
2  
3 1 additional nested qualitative study and interviewed on-line or via telephone, informed consent will  
4  
5 2 be obtained verbally before the interview. The researcher taking consent will read, and fill out, the  
6  
7 3 consent form on behalf of the participant and then sign the form [Supplementary file].  
8  
9

10  
11 4

#### 12 13 14 5 Randomisation

15  
16  
17 6 Consented participants will be randomised 1:1 using a computer-generated randomisation schedule  
18  
19 7 prepared by the trial statistician (RK). Individual randomisation will be stratified by recruitment  
20  
21 8 centre and permuted blocks of varying undisclosed sizes will be used. The randomisation schedule  
22  
23 9 will be concealed in sequentially numbered, opaque, sealed envelopes for each site. A study  
24  
25 10 administrator who has no interaction with blinded study staff will manage these envelopes. The  
26  
27 11 administrator will open the randomisation envelope, and then communicate with the local site who  
28  
29 12 will make the participant aware of their allocated group and refer for physiotherapy; making sure  
30  
31 13 that participants are allocated to physiotherapists delivering the treatment for their allocated arm.  
32  
33  
34

#### 35 14 Blinding

36  
37  
38 15 Physiotherapists delivering the interventions and participants will be told the treatment allocation.  
39  
40 16 Initial baseline assessment will occur prior to randomisation and the researcher undertaking  
41  
42 17 assessments will not be involved in any part of the randomisation procedure to ensure that they are  
43  
44 18 not able to bias the group allocation. The researcher conducting follow-up measures and the  
45  
46 19 research team personnel entering data will also not be informed of allocated group and participants  
47  
48 20 will be asked and reminded not to disclose their treatment group to the researcher at follow-up  
49  
50 21 appointments.  
51  
52  
53

#### 54 55 22 Interventions

#### 56 57 58 23 Training and monitoring 59 60

1  
2  
3 1 Sessions in both arms can be delivered in-person or virtually via video-call/ telephone as agreed  
4  
5 2 between participant and therapist; to allow flexibility and resilience as COVID restrictions on physical  
6  
7 3 attendance vary. Treatments were standardised and manualised and the study team provided  
8  
9 4 training in the multi-component exercise therapy treatments (delivered to all participants) to all  
10  
11 5 treating physiotherapists. Training in the behavioural adherence support intervention which  
12  
13 6 comprised assessment and a set of 9 behavioural interventions (the Opt-In toolkit) was delivered  
14  
15 7 separately to the therapists in the Opt-In arm. Treating physiotherapists will record the delivery and  
16  
17 8 content of each treatment session in adherence logs for each participant. Regular site visits will be  
18  
19 9 carried out to monitor intervention fidelity.  
20  
21  
22  
23

#### 24 10 Standard Care

25  
26  
27 11 Participants will be offered a 1-hour physiotherapy assessment and six individual outpatient  
28  
29 12 physiotherapy sessions spread over 16 weeks [2]. The physiotherapy will include a musculoskeletal  
30  
31 13 assessment and treatment including a multi-component, progressed balance, posture, strength  
32  
33 14 training and low impact weight-bearing exercise [3]. Exercise intensity will be assessed using the 10-  
34  
35 15 point Rating of Perceived Exertion scale (CR10-RPE), so participants work at a moderately hard to  
36  
37 16 hard (RPE 4-6) intensity. Although current practice may vary, the package agreed as the standard  
38  
39 17 care is based on consensus, best practice guidelines and successful delivery in the PROVE trial  
40  
41 18 exercise arm [2] and aims to be a credible representation of current best practice treatment across  
42  
43 19 the NHS. Treating therapists will receive prior training on prescription of the exercises [2].  
44  
45  
46  
47

#### 48 20 Opt -In

49  
50  
51 21 Participants allocated to Opt-In will receive the standard package described above, plus an  
52  
53 22 additional, integrated assessment interview (30mins) and 60 minutes of adherence support spread  
54  
55 23 over the subsequent treatment period of 16 weeks in an individualised pattern as required by the  
56  
57 24 participant.  
58  
59  
60

1  
2  
3 1 Participants in the Opt-In arm will complete the Personalized Exercise Questionnaire (PEQ). The PEQ  
4  
5 2 was developed in Canada to support patient-centred exercise prescription for people with  
6  
7 3 osteoporosis and covers topics such as barriers to exercise and goals of treatment [16]. Treating  
8  
9 4 physiotherapists will have a collaborative discussion with the participant using a motivational  
10  
11 5 interviewing approach drawing upon PEQ responses and considering goals, motivators, facilitators,  
12  
13 6 and barriers surrounding exercise. It aims to provide physiotherapists with a deeper understanding  
14  
15 7 of patient motivations and circumstances, to strengthen the therapeutic alliance and the patient's  
16  
17 8 own motivations for adopting exercise [12]. Using their assessment findings, the questionnaire and  
18  
19 9 collaborative interview the physiotherapist will assess a participant's exercise capability (C),  
20  
21 10 opportunity (O) and motivation (M) to carry out exercise behaviour (B) (COM-B) and select an  
22  
23 11 adherence technique from the Opt-In toolkit in response [14]. Techniques can include education  
24  
25 12 about osteoporosis and exercises, education about and practice of fall prevention strategies,  
26  
27 13 Exercise Action Plans, a contact telephone call, and self-monitoring and feedback strategies such as,  
28  
29 14 exercise confidence rating scales or using an exercise diary. Techniques are linked to COM-B  
30  
31 15 domains to facilitate physiotherapist decision-making e.g., Education improves capability and  
32  
33 16 motivation (C, M) and a diagrammatic decision aid was developed to facilitate rapid decision-making  
34  
35 17 during treatment. Each Opt-In arm treating physiotherapist received a toolkit and training by the  
36  
37 18 study team about techniques and how to use them. Physiotherapists were asked to prescribe at  
38  
39 19 least 3 adherence techniques from the Opt-In toolkit over 16 weeks but could use more. The exact  
40  
41 20 techniques selected were personalised to the patient as was the pattern and spread of the 60-  
42  
43 21 minute adherence support time. Participants in the intervention arm were given a folder that  
44  
45 22 included their exercises and selected adherence materials e.g., exercise diary, education leaflet,  
46  
47 23 action plan record. Figure 2 summarises the intervention in a logic model.  
48  
49  
50  
51  
52  
53  
54  
55  
56  
57  
58  
59  
60

25 Concomitant care

1  
2  
3 1 Other aspects of health and social care will continue as usual. Analgesia and other medication use  
4  
5 2 will be collected by self-report diary. Additional treatments sourced outside of the trial including  
6  
7 3 contact with general practitioners and other health care professionals will be recorded in self-report  
8  
9 4 health utilisation diaries in which participants will asked to record their use of health and social care  
10  
11 5 services across the study e.g., GP, nurse, other physio, hospital admissions, home carer visits in  
12  
13 6 standardised study diaries. Diaries will be from 0-4, 4 to 8 and 8 to 12 months [17].  
14  
15  
16

### 17 Outcome Measures

18  
19  
20 8 The primary outcome measure will be the Timed Up and Go (TUG) at 12 months. The TUG is a test of  
21  
22 9 balance, lower limb strength and walking ability with established reliability and validity. It records  
23  
24 10 the time a person takes to stand up from a chair, walk 3 metres at a self-selected speed, turn, walk  
25  
26 11 back and sit down [18].  
27  
28  
29

30 12 Secondary outcome measures are:

- 31  
32  
33 13 • QUALEFFO 41: a disease specific measure of health-related quality of life (QoL) applicable to  
34  
35 14 patients with osteoporosis and vertebral fractures. It is a self-administered questionnaire  
36  
37 15 that provides scores on five domains: pain, physical function, social function, general health  
38  
39 16 perception, mental performance, and a total score. [19].  
40  
41  
42  
43 17
- 44  
45  
46 18 • Timed Loaded Standing (TLS): an assessment of shoulder and back muscle endurance for  
47  
48 19 people with VFF(s). [20].  
49  
50  
51  
52 20
- 53  
54  
55 21 • Thoracic kyphosis angle: measured non-radiographically using a flexicurve ruler, allowing an  
56  
57 22 angle of kyphosis to be calculated which is approximated to radiological measures of  
58  
59 23 kyphosis (Cobb angle) using a standardised formula [21].  
60

- 1  
2  
3 1 • Back pain: measured with a 10-point Numeric Pain Rating Scale (NPRS) [22].  
4  
5 2  
6  
7  
8 3 • Functional Reach (FR) test: a measure of dynamic standing balance developed for older  
9  
10 4 adults. The test has been used in people with VFF and performance is predictive of falls  
11  
12 5 risk [23].  
13  
14  
15 6  
16  
17  
18 7 • Six-minute walk (6MW) test: a measure of functional walking capacity and aerobic cardio-  
19  
20 8 respiratory fitness [24].  
21  
22  
23 9  
24 10 • Falls Efficacy Scale International (FES-I): a 16 item (3 minute) self-report measure of fear or  
25  
26 11 concern about falling during activities [25].  
27  
28  
29  
30 12  
31  
32  
33 13 • Grip Strength: is the maximum force the hand and forearm muscles can generate measured  
34  
35 14 with an isometric hand dynamometer in kilograms; maximum strength is the mean of three  
36  
37 15 trials (3 seconds each) and measured for both hands [26].  
38  
39  
40 16  
41  
42  
43 17 • Self-efficacy for exercise (SEE) scale: a brief (<5 minute) 9-item scale that asks participants to  
44  
45 18 rate how confident they would be that they would engage in exercise on a 10-point scale  
46  
47 19 (not confident to very confident) under different situations e.g., if they were tired. SEE  
48  
49 20 ratings are predictive of exercise behaviour [27].  
50  
51  
52  
53 21  
54  
55  
56 22 • Adherence. This will be measured in two ways:  
57  
58  
59  
60

- 1  
2  
3 1 a. Attendance records via clinician completed treatment logs, including a checkbox to log  
4  
5 2 whether adherence techniques have been prescribed (intervention group only).  
6  
7  
8 3 b. Exercise adherence rating scale (EARS): a brief 6-item scale that asks participants to  
9  
10 4 describe how they do their recommended exercises on a 5-point scale [28].  
11  
12  
13  
14 5 • Falls: documented on the CRF and prospectively using participant completed event diaries.  
15  
16 6 These will be collected in blocks from 0-4 months, 4 to 8 months, and 8 to 12 months during  
17  
18 7 the study. Incidence and severity formation will be recorded e.g., nature of the fall, its  
19  
20 8 outcome (no-harm, fracture etc) and any treatment required [2].  
21  
22  
23 9  
24  
25 10 • EQ-5D-5L is a short, generic measure of health related QoL and will be completed to assist  
26  
27 11 assessment of health economics [29].  
28  
29  
30  
31 12  
32  
33  
34 13  
35  
36 14 A summary of outcome measures and timepoints is shown in Table 1 (**Table 1**).  
37  
38 15  
39  
40  
41 16  
42  
43  
44  
45  
46  
47  
48  
49  
50  
51  
52  
53  
54  
55  
56  
57  
58  
59  
60

A summary of outcome measures and timepoints is shown in Table 1 (**Table 1**).

1

| Time Point                | Measurement                                         | Enrolment | allocation | Baseline | 4 months | 8 months | 12 months |
|---------------------------|-----------------------------------------------------|-----------|------------|----------|----------|----------|-----------|
| Screening Log             |                                                     | X         |            |          |          |          |           |
| Eligibility confirmed     |                                                     | x         |            |          |          |          |           |
| Informed Consent          |                                                     | x         |            |          |          |          |           |
| Randomisation             |                                                     |           | x          |          |          |          |           |
| Demographic               | Age, gender, weight, ethnicity,                     |           |            | x        |          |          |           |
| Primary OM                | Timed Up & Go                                       |           |            | x        | x        | x        | x         |
| Quality of Life           | QUALEFFO 41                                         |           |            | X        | X        | X        | X         |
| Fear Falling              | FES-I                                               |           |            | X        | X        | X        | X         |
| Back Pain Intensity       | NRS-P                                               |           |            | X        | X        | X        | X         |
| Back strength / endurance | TLS                                                 |           |            | X        | X        | X        | X         |
| Walking                   | 6MWT                                                |           |            | X        | X        | X        | X         |
| Balance                   | Functional Reach Test                               |           |            | X        | X        | X        | X         |
| Kyphosis                  | Flexicurve                                          |           |            | X        | X        | X        | X         |
| Grip Strength             | Dynamometer                                         |           |            | x        | x        | x        | x         |
| EQ-5D-5L                  | Health economics                                    |           |            | x        | x        | x        | x         |
| Falls                     | Number of reported falls. Nature; outcome of falls. |           |            |          | x        | x        | x         |
| Exercise Self Efficacy    | SEE                                                 |           |            | X        | X        | X        | X         |
| Exercise adherence        | EARS                                                |           |            | X        | X        | X        | X         |
| Exercise adherence        | Sessions attended                                   |           |            |          | x        | x        | x         |

2

3 Table 1: Time Points at which outcomes will be assessed.

4

5 Adverse events

6 Adverse events (AE) occurring because of the trial interventions will be recorded. Participants will

7 receive information on potential AEs resulting from the exercises and what they should do if they

1  
2  
3 1 experience an AE, as would be part of standard NHS procedure. Adverse symptoms in response to  
4  
5 2 treatment and any adverse events will be monitored by clinicians regularly and in line with local  
6  
7 3 departmental procedures and captured on adverse event forms, and via questions on the CRF.  
8  
9  
10 4 A Serious AE (SAE) is any untoward medical occurrence related to the trial interventions that results  
11  
12 5 in death, is life-threatening, requires inpatient hospitalisation or prolongation of existing  
13  
14 6 hospitalisation, or results in persistent or significant disability/incapacity. SAEs are likely to be rare  
15  
16 7 and are unlikely to occur as a result of the exercise programmes delivered in this study.  
17  
18  
19 8 Any reports of SAE will be reported to the trial office within 24 hours of the local research team  
20  
21 9 becoming aware of the event. They will be reviewed by an independent medically qualified assessor  
22  
23 10 within 3 days.  
24  
25  
26  
27

## 28 Statistics and analysis

### 31 Sample Size

32  
33  
34 13 The primary outcome is the Timed Up & Go (TUG) test. This is the most widely used physical function  
35  
36 14 measure in RCTs of exercise for people with VFF [4]. The minimal clinically important difference  
37  
38 15 (MCID) for the TUG has not been established in people with VFF(s), but a MCID of 1.4s is reported for  
39  
40 16 similar older populations with chronic musculoskeletal disorders [30]. The study requires 104  
41  
42 17 participants (52 per arm) to be 80% powered to detect a 1.4s difference in TUG score between  
43  
44 18 groups at a 5% significance level (two-sided) assuming that the standard deviation is 2.5s. Similar  
45  
46 19 trials have had loss to follow-up rates of 10% at 12 months [2]. To account for this the sample size  
47  
48 20 has been inflated to 116 participants (58 per arm).  
49  
50  
51  
52

### 53 Statistical Analysis

54  
55  
56 22 The study will be reported according to the Consolidated Standards of Reporting Trials (CONSORT)  
57  
58 23 2010 statement utilising the nonpharmacological and patient-reported outcome extensions [ 31,32].  
59  
60



1  
2  
3 1 Standard descriptive statistics will be used to describe the characteristics of the two groups at  
4  
5 2 baseline. Means and standard deviations (SDs) or medians and interquartile ranges (IQRs) as  
6  
7 3 appropriate will be used for continuous variables, and numbers and percentages will be used for  
8  
9 4 binary and categorical variables.

10  
11  
12  
13 5 Compliance with the intervention will be defined as participating in the extended interview and  
14  
15 6 prescription of at least 3 adherence support techniques. This will be recorded on treatment logs.  
16  
17 7 Details of the number of physiotherapy sessions attended will also be summarised by treatment  
18  
19 8 group. The number and proportion of participants who withdraw will be summarised along with  
20  
21 9 reasons for these. Deaths are not anticipated in this study, but details of any that do occur will also  
22  
23 10 be summarised by treatment arm.

24  
25  
26  
27 11 Summary statistics will be presented for all comparative outcomes, and effect estimates will be  
28  
29 12 reported together with 95% confidence intervals with all tests carried out at a 5% two-sided  
30  
31 13 significance level.

32  
33  
34  
35 14 At 12 months post-randomisation the two treatment groups will be compared on the TUG measure  
36  
37 15 using a multivariate linear regression model adjusting for recruiting centre (stratification factor), age  
38  
39 16 and baseline TUG score. An unadjusted t-test will also be undertaken. The TUG is also recorded at 4,  
40  
41 17 and 8 months after randomisation, and an additional analysis utilising all time points, using multi-  
42  
43 18 level modelling and including a treatment by time interaction if appropriate will be undertaken. For  
44  
45 19 each of these models, the assumption of approximate normality will be assessed by examining the  
46  
47 20 residuals. If this assumption is not met the first approach will be to consider a transformation to  
48  
49 21 achieve normality. If this is not possible, the two groups will be compared using non-parametric  
50  
51 22 methods (e.g., Mann-Whitney U-test). This analysis will be unadjusted and will consider each time  
52  
53 23 point separately.  
54  
55  
56  
57  
58  
59  
60

1  
2  
3 1 Similar analyses will be performed for secondary outcomes which can be considered approximately  
4  
5 2 continuous (QUALEFFO-41, FES-1, NPRS, TLS, Grip strength, 6MW, FRT, Thoracic kyphosis, SEE and  
6  
7 3 EARS) at 4-, 8- and 12-months post-randomisation. The appropriateness of the assumption of  
8  
9 4 approximate normality will also be considered and transformation to normality or non-parametric  
10  
11 5 methods used as appropriate. It is not anticipated that the number of falls will be approximately  
12  
13 6 normal, therefore, this will be summarised by treatment group using medians and IQRs and  
14  
15 7 compared using non-parametric methods. The number and proportion of participants experiencing  
16  
17 8 an AE during follow-up will be summarised by treatment group and a logistic regression model  
18  
19 9 adjusted for recruiting centre will be used to compare the rates in the two groups. Severity of AEs  
20  
21 10 will also be summarised by treatment group.

22  
23  
24  
25  
26 11 In addition, since previous work suggests that change in thoracic kyphosis at follow-up is closely  
27  
28 12 related to baseline values, a subgroup analysis of thoracic kyphosis at follow-up will be completed  
29  
30 13 dependent on whether the participant was kyphotic at baseline [33].

31  
32  
33  
34 14 All analyses will be performed for the intention to treat (ITT) population. This will include all  
35  
36 15 randomised participants with available data who will be analysed according to their allocated  
37  
38 16 intervention regardless of the treatment they received.

39  
40  
41 17 In addition, analysis of the primary outcome (TUG at 12 months) will be repeated for the per  
42  
43 18 protocol (PP) population which will include only those participants who received their allocated  
44  
45 19 treatment. Participants with other major protocol deviations (e.g., recruited and later found to be  
46  
47 20 ineligible) will also be excluded from this population.

### 21 Health Economic Analysis

22  
23 22 The relative efficiency of the intervention will be assessed by within-trial cost-utility and cost-  
24  
25 23 consequences analyses [34]. The evaluation will take an NHS and personal social services  
26  
27 24 perspective. Resource use for the delivery of Opt-In and at participant level will be combined with  
28  
29  
30

1 unit cost from standard national sources to estimate average total costs. We will estimate the  
2 incremental cost per quality-adjusted life year (QALY) (from EQ-5D-5L) and present the different cost  
3 components and multiple benefits of Opt-In in a 'balance sheet' in the cost-consequences analysis.

#### 4 Embedded Qualitative study

5 As part of the main study a nested qualitative study will take place. The qualitative element of this  
6 study will involve a subset (12-15) of patients who undertake the Opt-In intervention who will be  
7 invited to take part in 4 short (15-20 minute) interviews about their experiences and views about  
8 exercise adherence and the adherence intervention at the following time points: i) following  
9 assessment ii) during treatment (after 3 sessions), iii) post-treatment (after 4 months), and iv) at 12  
10 months. The interviews may occur online via video-call or face-to-face in the person's home or at a  
11 local clinic, depending on participant preference. The interviews will be audio recorded and  
12 transcribed verbatim. Participants will be given an opportunity to check the interview transcript.  
13 Focus groups will be conducted with physiotherapists who undertake the Opt-In intervention, asking  
14 them to share their views about promoting exercise adherence and the Opt-In intervention, these  
15 will be audio-recorded with a Dictaphone.

16 Purposive sampling will be used to achieve a sample which includes men and women, patients of  
17 varying activity levels and patients of different ages and disease severity (pain/ number of fractures).  
18 These factors may influence the ability to engage with an exercise programme. Since most research  
19 regarding adherence in osteoporosis has previously been undertaken with women, it also  
20 considered important to capture the views of men within the current study and to capture the  
21 experiences of people with differing physical activity levels prior to the programme. The quality of a  
22 qualitative study is not dependent on its sample size; however, the sample size needs to be  
23 sufficiently large to enable relevant data to be obtained, without being so overly large that detailed  
24 analysis is subsequently prevented [35]. Information about physiotherapists views of delivering the

1 adherence interventions will also be sought. All those who deliver the adherence techniques will be  
2 invited to participate in a focus group.

3 Audio recordings will be listened to, and transcripts read until they become familiar. Data from the  
4 interviews with physiotherapists and participants will be analysed separately to understand the  
5 perspectives of each group. We will use collaborative methods to ensure a strong voice from PPI  
6 members and research rigour. We will use thematic analysis, using the six steps proposed by Braun  
7 and Clarke [36].

#### 8 Patient and Public Involvement

9 The study funding application, intervention development and study materials preparation were  
10 supported by our patient and public involvement members who will be involved across the course of  
11 the study.

#### 12 ETHICS AND DISEMINATION.

13 The study protocol was approved by West of Scotland Research Ethics Committee 4 (Reference  
14 21/WS/0071). The University of Oxford is the sponsor. The trial is registered with the International  
15 Standard Randomised Controlled Trials database ISRCTN reference number 14465704.

16 The protocol has been reported following the Standard Protocol Items: Recommendations for  
17 Interventional Trials (SPIRIT) statement [37]. Results will be published reported following the  
18 Consolidated Standards of Reporting Trials (CONSORT) guidelines [38]. The Template for  
19 Intervention Description and Replication (TIDieR) statement will be used to report the intervention  
20 ensuring replication is possible [39]. Results will be published in a peer reviewed journal with  
21 authorship eligibility according to International Committee of Medical Journal Editors (ICJME)  
22 criteria. Participants will be asked if they wish to have the results shared with them prior to  
23 publication and we will share with those who request this. We plan to publish results in an

1 international peer-reviewed journal and at international rehabilitation and bone health focussed  
2  
3  
4  
5 1 international peer-reviewed journal and at international rehabilitation and bone health focussed  
6 conferences.  
7

### 8 **Contributions of Authors:**

9  
10  
11 4 Karen L Barker: Chief Investigator, Conceived and designed the study, was awarded the funding and  
12 had overall responsibility for the study design and delivery and drafted the manuscript. She is the  
13 guarantor.  
14  
15  
16  
17

18  
19 7 Jonathan Room: contributed to study design and provided specific content and edited manuscript.  
20  
21 8 Qualitative lead.  
22

23  
24 9 Erin Hannink: contributed to study design and provided specific content and edited manuscript  
25

26  
27 10 Ruth Knight (statistical co-applicant) performed the sample size calculation, prepared randomisation  
28 schedules, planned statistical analysis methods  
29

30  
31  
32 12 Meredith Newman (Trial Manager), trial design, intervention development, manualisation, training,  
33 supervision, writing and reviewing report.  
34  
35  
36

### 37 **Funding**

38  
39  
40  
41 15 The study is supported by an independent grant from the Chartered Society of Physiotherapy  
42 Charitable Trust (RP/19/01).  
43  
44  
45

### 46 **Competing Interests**

47  
48  
49 18 All authors have completed the ICMJE uniform disclosure form at [www.icmje.org/coi\\_disclosure.pdf](http://www.icmje.org/coi_disclosure.pdf)  
50 and declare: no support from any organisation for the submitted work, other than funding  
51 arrangements for the trial described in body of the text; no financial relationships with any  
52 organisations that might have an interest in the submitted work in the previous three years; no  
53 other relationships or activities that could appear to have influenced the submitted work.  
54  
55  
56  
57  
58  
59  
60

## 1 Transparency

2  
3  
4  
5  
6 2 The lead author (KLB) affirms that the manuscript is an honest, accurate and transparent account of  
7  
8 3 the study being reported.  
9

## 10 11 4 Figure Legends

### 12 13 14 5 Figure 1: Study Flow Diagram

### 15 16 17 6 Figure 2: Logic Model for intervention

## 18 19 20 7 References

- 21  
22  
23 8 1. Gibbs JC, MacIntyre NJ, Ponzano M, et al. Exercise for improving outcomes after  
24 9 osteoporotic vertebral fracture. *Cochrane Database Syst Rev.* 2019 Jul 5; 7:  
25 10 CD008618. doi: 10.1002/14651858.
- 26  
27 11 2. Barker K, Newman M, Stallard N, et al. Physiotherapy Rehabilitation for  
28 12 Osteoporotic Vertebral Fracture: A Randomised Controlled Trial and economic  
29 13 evaluation (PROVE Trial). *Osteoporos Int*, 2019 Nov 12.
- 30  
31 14 3. Brooke-Wavell K, Skelton D, Barker KL, Clark EM, de Biase S, Arnold S, Paskins Z,  
32 15 Robinson KR, Lewis RM, Tobias JH, Ward KA, Whitney J, Leyland S. Strong, steady  
33 16 and straight: UK consensus statement on physical activity and exercise for  
34 17 osteoporosis. *Br J Sports Med* 2022 May 16 bjsports-2021-104634.
- 35  
36 18 4. [https://strwebprdmedia.blob.core.windows.net/media/kuphgv1u/ros-guidance-](https://strwebprdmedia.blob.core.windows.net/media/kuphgv1u/ros-guidance-on-managing-symptoms-of-vertebral-fractures-2022.pdf)  
37 19 [on-managing-symptoms-of-vertebral-fractures-2022.pdf](https://strwebprdmedia.blob.core.windows.net/media/kuphgv1u/ros-guidance-on-managing-symptoms-of-vertebral-fractures-2022.pdf). Accessed 17.08.22
- 38  
39  
40 20
- 41 21 5. Gold DT, Shipp KM, Pieper CF, et al. Group treatment improves trunk strength and  
42 22 psychological status in older women with vertebral fractures: results of a RCT. *J*  
43 23 *Am Geriatr Soc* 2004; 52:1471–1478.
- 44  
45 24
- 46  
47 25 6. Bergström I et al. Back extensor training increases muscle strength in  
48 26 postmenopausal women with osteoporosis, kyphosis and vertebral fractures. *Adv*  
49 27 *Physiother* 2011; 13:110–117.
- 50  
51 28
- 52 29 7. Bergland A. et al. Effect of exercise on mobility, balance, and health-related  
53 30 quality of life in osteoporotic women with a history of vertebral fracture: a  
54 31 randomized, controlled trial. *Osteoporos Int.* 2011; 22: 1863-71.
- 55  
56  
57  
58  
59  
60

- 1  
2  
3 1 8. Olsen CF, Bergland A. The effect of exercise and education on fear of falling in  
4 2 elderly women with osteoporosis and a history of vertebral fracture: results of a  
5 3 randomized controlled trial. *Osteoporos Int*. 2014; 2: 2017-25.
- 6  
7 4 9. Gibbs JC, McArthur C, Wark J et al. The effect home exercise in older women with  
8 5 vertebral fractures: A pilot randomised controlled trial. *Physical Therapy*. 3 Jan  
9 6 2020 doi.org/10.1093/ptj/pzz188
- 10  
11 7 10. Evstigneeva L, Lesnyak O, Bultink IEM et al Effect of a twelve-month physical  
12 8 exercise program of patients with osteoporotic vertebral fractures: a randomised  
13 9 controlled trial. *Osteoporos Int* 2016 27: 2515-24.
- 14  
15 10 11. Room J, Hannink E, Dawes H, et al. What interventions are used to improve  
16 11 exercise adherence in older people and what behavioural techniques are they  
17 12 based on? *BMJ Open*. 2017; 7(12): e019221.
- 18  
19 13 12. Beavious C. Motivational interviewing to improve treatment adherence. *Joint*  
20 14 *Bone Spine*. 2019 Feb 22: pii: S1297-319X (19)30042-9. doi:  
21 15 10.1016/j.jbspin.2019.02.005.
- 22  
23 16 13. NICE draft guidance on behaviour change URL:  
24 17 [https://www.nice.org.uk/guidance/ph49/documents/behaviour-change-draft-](https://www.nice.org.uk/guidance/ph49/documents/behaviour-change-draft-guidance2)  
25 18 [guidance2](https://www.nice.org.uk/guidance/ph49/documents/behaviour-change-draft-guidance2)(accessed 11th March 2020).
- 26  
27 19 14. Room J, Boulton M, Dawes H, et al. Development of an exercise adherence  
28 20 intervention for older people. The steps taken designing a complex intervention  
29 21 for the AERO trial. *WCPT 2019: PO-J-09-SUN1*
- 30  
31 22 15. Michie S, van Stralen M, West R. The behaviour change wheel: A new method for  
32 23 characterising and designing behaviour change interventions. *Implementation*  
33 24 *Science* 2011, 6:42.
- 34  
35 25 16. Rodrigues IB, Jonathan D, Adachi JD, Beattie5 KA, MacDermid JC. Development  
36 26 and validation of a new tool to measure the facilitators, barriers and preferences  
37 27 to exercise in people with osteoporosis. *BMC Musculoskeletal Disorders* 2017  
38 28 18:540. DOI 10.1186/s12891-017-1914-5.
- 39  
40 29 17. Drummond M, Sculpher M, Torrance G, O'Brien B, Stoddart G. *Methods for the*  
41 30 *economic evaluation of health care programmes*: Oxford University Press; 2005.
- 42  
43 31 18. Podsiadlo, D. and Richardson, S. (1991). "The timed "Up & Go": a test of basic  
44 32 functional mobility for frail elderly persons." *J Am Geriatr Soc* 39(2): 142-148.
- 45  
46 33 19. International Osteoporosis Foundation Quality of life questionnaires QUALEFFO-  
47 34 41. URL: [https://www.osteoporosis.foundation/health-professionals/research-](https://www.osteoporosis.foundation/health-professionals/research-tools/quality-life-questionnaires)  
48 35 [tools/quality-life-questionnaires](https://www.osteoporosis.foundation/health-professionals/research-tools/quality-life-questionnaires) (accessed 30 March 2022).
- 49  
50 36 20. Newman M, Newman R, Hughes T, Vadher K, Barker KL. Is the timed loaded  
51 37 standing test a valid measure of back muscle endurance in people with vertebral  
52 38 osteoporosis? *Osteoporos Int*. 2018; 29:893–905.
- 53  
54 39 21. Greendale GA, Nili NS, Huang MH, Seeger L, Karlamangla AS. The reliability and  
55 40 validity of three non-radiological measures of thoracic kyphosis and their relations  
56 41 to the standing radiological Cobb angle. *Osteoporos Int* 2011; 22:1897–905.

1  
2  
3  
4  
5  
6  
7  
8  
9  
10  
11  
12  
13  
14  
15  
16  
17  
18  
19  
20  
21  
22  
23  
24  
25  
26  
27  
28  
29  
30  
31  
32  
33  
34  
35  
36  
37  
38  
39  
40  
41  
42  
43  
44  
45  
46  
47  
48  
49  
50  
51  
52  
53  
54  
55  
56  
57  
58  
59  
60

22. Jensen, M.P. and Karoly, P. (2011). "Self-report scales and procedures for assessing pain in adults", in Turk, D.C. and Melzack, R. (eds). Handbook of pain assessment, 3rd edition. New York, Guilford Press, 19-44.
23. Weiner DK, Duncan PW et al. Functional reach: a marker of physical frailty. *J Am Geriatr Soc* 1992; 40(3):203-7.
24. Steffen TM, Hacker TA, Mollinger L. Age- and gender-related test performance in community-dwelling elderly people: Six-Minute Walk Test, Berg Balance Scale, Timed Up and Go Test, and gait speeds. *Phys Ther* 2002; 82:128-37.
25. Delbaere K, Close JCT et al. The falls efficacy scale international (FES-I). A comprehensive longitudinal validation study. *Age and Ageing* 2010; 39: 201-16.
26. Abizanda P, Navarro JL et al. Validity and usefulness of handheld- dynamometry for measuring muscle strength in community-dwelling older persons. *Arch Gerontol Geriatr*. 2012; 54(1): 21-7.
27. Resnick B and Jenkins LS. Testing the reliability and validity of the self-efficacy for exercise scale. *Nurs Res* 49 (3): 154-159.
28. Newman-Beinart NA et al. The development and initial psychometric evaluation of a measure assessing adherence to prescribed exercise: the Exercise Adherence Rating Scale (EARS). *Physiotherapy* 103 (2017) 180-85.
29. Herdman M, Gudex C, Lloyd A et al. Development and preliminary testing of the new five-level version of the EQ-5D-5L (EQ-5D-5L). *Qual Life Res* 2011; 20 (10): 1727-36.28.
30. Wright A, Cook C, Baxter G, et al. A comparison of 3 methodological approaches to defining major clinically important improvements of 4 performance measures in patients with hip osteoarthritis. *J Orthop Sport Phys*. 2011; 41: 319 -27.
31. Schulz KF, Altman DG, Moher D, for the CONSORT Group. CONSORT 2010 Statement: updated guidelines for reporting parallel group randomised trials. *BMC Trials*. 2010; 11:32.
32. Calvert M, Blazeby J, Altman DG, et al. Reporting of patient-reported outcomes in randomized trials: the CONSORT PRO Extension. *JAMA*. 2013;309(8):814-22.
33. Hannink E, Newman M, Barker KL. Does thoracic kyphosis severity predict response to physiotherapy rehabilitation in patients with osteoporotic vertebral fracture? A secondary analysis of the PROVE RCT. *Physiotherapy* Feb 17, 2022,
34. Drummond M, Sculpher M, Torrance G, O'Brien B, Stoddart G. *Methods for the economic evaluation of health care programmes*: Oxford University Press; 2005.
35. Sandelowski, M., *Sample size in qualitative research*. *Research in Nursing and Health*, 1995. 18(2): p. 179-183.
36. Braun V, Clarke V. What can "thematic analysis" offer health and wellbeing researchers? *Int J Qual Stud Health Well-being*. 2014; 9:26152.
37. Chan A-W, Tetzlaff JM, Gotzsche PC et al. SPIRIT 2013 explanation and elaboration: guidance for protocols of clinical trials. *BMJ* 2013;346: e7586.



- 1  
2  
3 1 38. Schulz KF, Altman DG, Moher D et al. CONSORT 2010 statement: updated  
4 2 guidelines for reporting parallel group randomised trials. BMJ 2010;340:c332.  
5  
6 3 39. Hoffmann TC, Glasziou PP, Boutron I et al. Better reporting of interventions:  
7 4 template for intervention description and replication (TIDieR) checklist and guide.  
8 5 BMJ 2014; 348: g1687.  
9  
10 6  
11  
12  
13  
14  
15  
16  
17  
18  
19  
20  
21  
22  
23  
24  
25  
26  
27  
28  
29  
30  
31  
32  
33  
34  
35  
36  
37  
38  
39  
40  
41  
42  
43  
44  
45  
46  
47  
48  
49  
50  
51  
52  
53  
54  
55  
56  
57  
58  
59  
60

For peer review only



Qualitative Interviews n =15-20 participants  
Focus group Physiotherapists

1  
2  
3  
4  
5  
6  
7  
8  
9  
10  
11  
12  
13  
14  
15  
16  
17  
18  
19  
20  
21  
22  
23  
24  
25  
26  
27  
28  
29  
30  
31  
32  
33  
34  
35  
36  
37  
38  
39  
40  
41



**OPTIN Logic Diagram**

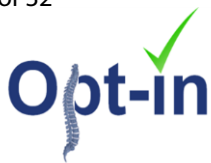

TRUST LOGO (if applicable), or a placeholder, 'local logo/letterhead'

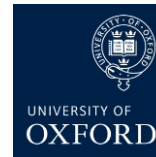

**Chief Investigator: Professor Karen Barker**

**Principal Investigator: <<PI name here>>**

**<<Local hospital address here>>**

|                   |                  |                           |
|-------------------|------------------|---------------------------|
| <i>Study code</i> | <i>Site code</i> | <i>Participant number</i> |
| O P T             |                  |                           |

### CONSENT FORM – Main study

#### OsteoPorosis Tailored exercise adherence INtervention (Opt-In)

*If you agree,  
please initial each  
box*

|                                                                                                                                                                                                                                                                                                                                                 |  |
|-------------------------------------------------------------------------------------------------------------------------------------------------------------------------------------------------------------------------------------------------------------------------------------------------------------------------------------------------|--|
| 1. I confirm that I have read the information sheet dated..... (version.....) for this study. I have had the opportunity to consider the information, ask questions and have had these answered satisfactorily.                                                                                                                                 |  |
| 2. I understand that my participation is voluntary and that I am free to withdraw at any time without giving any reason, without my medical care or legal rights being affected.                                                                                                                                                                |  |
| 3. I understand that relevant sections of my medical notes and data collected during the study may be looked at by individuals from University of Oxford, from regulatory authorities and from the NHS Trust(s), where it is relevant to my taking part in this research. I give permission for these individuals to have access to my records. |  |
| 4. I agree to my General Practitioner being informed of my participation in the study.                                                                                                                                                                                                                                                          |  |
| 5. I understand I may be contacted for the option to participate in qualitative interview or focus group related to the study.                                                                                                                                                                                                                  |  |
| 6. I agree to take part in this study.                                                                                                                                                                                                                                                                                                          |  |

|                               |      |           |
|-------------------------------|------|-----------|
| Name of Participant           | Date | Signature |
| Name of Person taking Consent | Date | Signature |

*\*1 copy for participant; 1 copy for local researcher site file; 1 (original) to be kept in medical notes (if participant is a patient).*

|                                                                |                                  |
|----------------------------------------------------------------|----------------------------------|
| Consent Form – Main study                                      | v1.0 / 21MAY2021                 |
| OsteoPorosis Tailored exercise adherence INtervention (Opt-In) | IRAS Project number: 287716      |
| Chief Investigator: Professor Karen Barker                     | REC Reference number: 21/WS/0071 |

For peer review only - <http://bmjopen.bmj.com/site/about/guidelines.xhtml>



STANDARD PROTOCOL ITEMS: RECOMMENDATIONS FOR INTERVENTIONAL TRIALS

SPIRIT 2013 Checklist: Recommended items to address in a clinical trial protocol and related documents\*

| Section/item                      | Item No | Description                                                                                                                                                                                                                                                                              |
|-----------------------------------|---------|------------------------------------------------------------------------------------------------------------------------------------------------------------------------------------------------------------------------------------------------------------------------------------------|
| <b>Administrative information</b> |         |                                                                                                                                                                                                                                                                                          |
| Title                             | 1       | Descriptive title identifying the study design, population, interventions, and, if applicable, trial acronym <b>Title Page Lines 1-3</b>                                                                                                                                                 |
| Trial registration                | 2a      | Trial identifier and registry name. If not yet registered, name of intended registry <b>Page 3 Line 21</b>                                                                                                                                                                               |
|                                   | 2b      | All items from the World Health Organization Trial Registration Data Set                                                                                                                                                                                                                 |
| Protocol version                  | 3       | Date and version identifier <b>Page 3 Line 22</b>                                                                                                                                                                                                                                        |
| Funding                           | 4       | Sources and types of financial, material, and other support <b>Page 23 lines 9/10</b>                                                                                                                                                                                                    |
| Roles and responsibilities        | 5a      | Names, affiliations, and roles of protocol contributors <b>Title page and Page 22/23</b>                                                                                                                                                                                                 |
|                                   | 5b      | Name and contact information for the trial sponsor <b>Page 19 Line 12</b>                                                                                                                                                                                                                |
|                                   | 5c      | Role of study sponsor and funders, if any, in study design; collection, management, analysis, and interpretation of data; writing of the report; and the decision to submit the report for publication, including whether they will have ultimate authority over any of these activities |
|                                   | 5d      | Composition, roles, and responsibilities of the coordinating centre, steering committee, endpoint adjudication committee, data management team, and other individuals or groups overseeing the trial, if applicable (see Item 21a for data monitoring committee)                         |
| <b>Introduction</b>               |         |                                                                                                                                                                                                                                                                                          |
| Background and rationale          | 6a      | Description of research question and justification for undertaking the trial, including summary of relevant studies (published and unpublished) examining benefits and harms for each intervention <b>P5-6</b>                                                                           |
|                                   | 6b      | Explanation for choice of comparators <b>P6</b>                                                                                                                                                                                                                                          |
| Objectives                        | 7       | Specific objectives or hypotheses <b>P6</b>                                                                                                                                                                                                                                              |

1  
2 Trial design 8 Description of trial design including type of trial (eg, parallel group,  
3 crossover, factorial, single group), allocation ratio, and framework (eg,  
4 superiority, equivalence, noninferiority, exploratory) P6 L22-3  
5  
6  
7

### 8 **Methods: Participants, interventions, and outcomes**

9  
10 Study setting 9 Description of study settings (eg, community clinic, academic hospital)  
11 and list of countries where data will be collected. Reference to where  
12 list of study sites can be obtained P7 L10  
13

14 Eligibility criteria 10 Inclusion and exclusion criteria for participants. If applicable, eligibility  
15 criteria for study centres and individuals who will perform the  
16 interventions (eg, surgeons, psychotherapists) P7-8  
17  
18

19 Interventions 11a Interventions for each group with sufficient detail to allow replication,  
20 including how and when they will be administered P10-11  
21

22 11b Criteria for discontinuing or modifying allocated interventions for a  
23 given trial participant (eg, drug dose change in response to harms,  
24 participant request, or improving/worsening disease) n/a  
25

26 11c Strategies to improve adherence to intervention protocols, and any  
27 procedures for monitoring adherence (eg, drug tablet return,  
28 laboratory tests) p10/11  
29  
30

31 11d Relevant concomitant care and interventions that are permitted or  
32 prohibited during the trial p12  
33

34 Outcomes 12 Primary, secondary, and other outcomes, including the specific  
35 measurement variable (eg, systolic blood pressure), analysis metric  
36 (eg, change from baseline, final value, time to event), method of  
37 aggregation (eg, median, proportion), and time point for each  
38 outcome. Explanation of the clinical relevance of chosen efficacy and  
39 harm outcomes is strongly recommended p12-14  
40  
41

42 Participant 13 Time schedule of enrolment, interventions (including any run-ins and  
43 timeline washouts), assessments, and visits for participants. A schematic  
44 diagram is highly recommended (see Figure) Table 1  
45

46 Sample size 14 Estimated number of participants needed to achieve study objectives  
47 and how it was determined, including clinical and statistical  
48 assumptions supporting any sample size calculations P15  
49  
50

51 Recruitment 15 Strategies for achieving adequate participant enrolment to reach  
52 target sample size P8  
53

### 54 **Methods: Assignment of interventions (for controlled trials)**

55 Allocation:  
56  
57  
58  
59  
60

|    |                |     |                                                                         |
|----|----------------|-----|-------------------------------------------------------------------------|
| 1  |                |     |                                                                         |
| 2  | Sequence       | 16a | Method of generating the allocation sequence (eg, computer-             |
| 3  | generation     |     | generated random numbers), and list of any factors for stratification.  |
| 4  |                |     | To reduce predictability of a random sequence, details of any planned   |
| 5  |                |     | restriction (eg, blocking) should be provided in a separate document    |
| 6  |                |     | that is unavailable to those who enrol participants or assign           |
| 7  |                |     | interventions P9                                                        |
| 8  |                |     |                                                                         |
| 9  |                |     |                                                                         |
| 10 | Allocation     | 16b | Mechanism of implementing the allocation sequence (eg, central          |
| 11 | concealment    |     | telephone; sequentially numbered, opaque, sealed envelopes),            |
| 12 | mechanism      |     | describing any steps to conceal the sequence until interventions are    |
| 13 |                |     | assignedp9                                                              |
| 14 |                |     |                                                                         |
| 15 | Implementation | 16c | Who will generate the allocation sequence, who will enrol participants, |
| 16 |                |     | and who will assign participants to interventions P9                    |
| 17 |                |     |                                                                         |
| 18 |                |     |                                                                         |
| 19 | Blinding       | 17a | Who will be blinded after assignment to interventions (eg, trial        |
| 20 | (masking)      |     | participants, care providers, outcome assessors, data analysts), and    |
| 21 |                |     | how P 9                                                                 |
| 22 |                |     |                                                                         |
| 23 |                | 17b | If blinded, circumstances under which unblinding is permissible, and    |
| 24 |                |     | procedure for revealing a participant's allocated intervention during   |
| 25 |                |     | the trial n/a                                                           |
| 26 |                |     |                                                                         |
| 27 |                |     |                                                                         |

### Methods: Data collection, management, and analysis

|    |                 |     |                                                                          |
|----|-----------------|-----|--------------------------------------------------------------------------|
| 28 |                 |     |                                                                          |
| 29 |                 |     |                                                                          |
| 30 | Data collection | 18a | Plans for assessment and collection of outcome, baseline, and other      |
| 31 | methods         |     | trial data, including any related processes to promote data quality (eg, |
| 32 |                 |     | duplicate measurements, training of assessors) and a description of      |
| 33 |                 |     | study instruments (eg, questionnaires, laboratory tests) along with      |
| 34 |                 |     | their reliability and validity, if known. Reference to where data        |
| 35 |                 |     | collection forms can be found, if not in the protocolp10                 |
| 36 |                 |     |                                                                          |
| 37 |                 |     |                                                                          |
| 38 |                 | 18b | Plans to promote participant retention and complete follow-up,           |
| 39 |                 |     | including list of any outcome data to be collected for participants who  |
| 40 |                 |     | discontinue or deviate from intervention protocols                       |
| 41 |                 |     |                                                                          |
| 42 | Data            | 19  | Plans for data entry, coding, security, and storage, including any       |
| 43 | management      |     | related processes to promote data quality (eg, double data entry;        |
| 44 |                 |     | range checks for data values). Reference to where details of data        |
| 45 |                 |     | management procedures can be found, if not in the protocol               |
| 46 |                 |     |                                                                          |
| 47 |                 |     |                                                                          |
| 48 | Statistical     | 20a | Statistical methods for analysing primary and secondary outcomes.        |
| 49 | methods         |     | Reference to where other details of the statistical analysis plan can be |
| 50 |                 |     | found, if not in the protocol P15-6                                      |
| 51 |                 |     |                                                                          |
| 52 |                 | 20b | Methods for any additional analyses (eg, subgroup and adjusted           |
| 53 |                 |     | analyses) n/a                                                            |
| 54 |                 |     |                                                                          |
| 55 |                 | 20c | Definition of analysis population relating to protocol non-adherence     |
| 56 |                 |     | (eg, as randomised analysis), and any statistical methods to handle      |
| 57 |                 |     | missing data (eg, multiple imputation) P15-17                            |
| 58 |                 |     |                                                                          |
| 59 |                 |     |                                                                          |
| 60 |                 |     |                                                                          |

## Methods: Monitoring

|                                                                                                                                                                                                                            |                 |     |                                                                                                                                                                                                                                                                                                                                                  |
|----------------------------------------------------------------------------------------------------------------------------------------------------------------------------------------------------------------------------|-----------------|-----|--------------------------------------------------------------------------------------------------------------------------------------------------------------------------------------------------------------------------------------------------------------------------------------------------------------------------------------------------|
| 1<br>2<br>3<br>4<br>5<br>6<br>7<br>8<br>9<br>10<br>11<br>12<br>13<br>14<br>15<br>16<br>17<br>18<br>19<br>20<br>21<br>22<br>23                                                                                              | Data monitoring | 21a | Composition of data monitoring committee (DMC); summary of its role and reporting structure; statement of whether it is independent from the sponsor and competing interests; and reference to where further details about its charter can be found, if not in the protocol. Alternatively, an explanation of why a DMC is not needed <b>n/a</b> |
| 24<br>25<br>26<br>27<br>28<br>29<br>30<br>31<br>32<br>33<br>34<br>35<br>36<br>37<br>38<br>39<br>40<br>41<br>42<br>43<br>44<br>45<br>46<br>47<br>48<br>49<br>50<br>51<br>52<br>53<br>54<br>55<br>56<br>57<br>58<br>59<br>60 | Harms           | 22  | Plans for collecting, assessing, reporting, and managing solicited and spontaneously reported adverse events and other unintended effects of trial interventions or trial conduct <b>P14-15</b>                                                                                                                                                  |
|                                                                                                                                                                                                                            | Auditing        | 23  | Frequency and procedures for auditing trial conduct, if any, and whether the process will be independent from investigators and the sponsor                                                                                                                                                                                                      |

## Ethics and dissemination

|                                                                                                                                                                                                                |                               |     |                                                                                                                                                                                                                                              |
|----------------------------------------------------------------------------------------------------------------------------------------------------------------------------------------------------------------|-------------------------------|-----|----------------------------------------------------------------------------------------------------------------------------------------------------------------------------------------------------------------------------------------------|
| 26<br>27<br>28<br>29<br>30<br>31<br>32<br>33<br>34<br>35<br>36<br>37<br>38<br>39<br>40<br>41<br>42<br>43<br>44<br>45<br>46<br>47<br>48<br>49<br>50<br>51<br>52<br>53<br>54<br>55<br>56<br>57<br>58<br>59<br>60 | Research ethics approval      | 24  | Plans for seeking research ethics committee/institutional review board (REC/IRB) approval <b>P22</b>                                                                                                                                         |
|                                                                                                                                                                                                                | Protocol amendments           | 25  | Plans for communicating important protocol modifications (eg, changes to eligibility criteria, outcomes, analyses) to relevant parties (eg, investigators, REC/IRBs, trial participants, trial registries, journals, regulators) <b>P 19</b> |
|                                                                                                                                                                                                                | Consent or assent             | 26a | Who will obtain informed consent or assent from potential trial participants or authorised surrogates, and how (see Item 32) <b>P8</b>                                                                                                       |
|                                                                                                                                                                                                                |                               | 26b | Additional consent provisions for collection and use of participant data and biological specimens in ancillary studies, if applicable <b>n/a</b>                                                                                             |
|                                                                                                                                                                                                                | Confidentiality               | 27  | How personal information about potential and enrolled participants will be collected, shared, and maintained in order to protect confidentiality before, during, and after the trial                                                         |
|                                                                                                                                                                                                                | Declaration of interests      | 28  | Financial and other competing interests for principal investigators for the overall trial and each study site <b>P23</b>                                                                                                                     |
|                                                                                                                                                                                                                | Access to data                | 29  | Statement of who will have access to the final trial dataset, and disclosure of contractual agreements that limit such access for investigators                                                                                              |
|                                                                                                                                                                                                                | Ancillary and post-trial care | 30  | Provisions, if any, for ancillary and post-trial care, and for compensation to those who suffer harm from trial participation <b>n/a</b>                                                                                                     |



- 1  
2  
3  
4  
5  
6  
7  
8  
9  
10  
11  
12  
13
- |                         |     |                                                                                                                                                                                                                                                                                         |
|-------------------------|-----|-----------------------------------------------------------------------------------------------------------------------------------------------------------------------------------------------------------------------------------------------------------------------------------------|
| Dissemination<br>policy | 31a | Plans for investigators and sponsor to communicate trial results to participants, healthcare professionals, the public, and other relevant groups (eg, via publication, reporting in results databases, or other data sharing arrangements), including any publication restrictions P19 |
|                         | 31b | Authorship eligibility guidelines and any intended use of professional writers P19                                                                                                                                                                                                      |
|                         | 31c | Plans, if any, for granting public access to the full protocol, participant-level dataset, and statistical code                                                                                                                                                                         |

## 14 Appendices

- 15  
16  
17  
18  
19  
20  
21  
22
- |                               |    |                                                                                                                                                                                                |
|-------------------------------|----|------------------------------------------------------------------------------------------------------------------------------------------------------------------------------------------------|
| Informed consent<br>materials | 32 | Model consent form and other related documentation given to participants and authorised surrogates                                                                                             |
| Biological<br>specimens       | 33 | Plans for collection, laboratory evaluation, and storage of biological specimens for genetic or molecular analysis in the current trial and for future use in ancillary studies, if applicable |

---

23  
24  
25  
26  
27  
28  
29  
30  
31  
32  
33  
34  
35  
36  
37  
38  
39  
40  
41  
42  
43  
44  
45  
46  
47  
48  
49  
50  
51  
52  
53  
54  
55  
56  
57  
58  
59  
60

\*It is strongly recommended that this checklist be read in conjunction with the SPIRIT 2013 Explanation & Elaboration for important clarification on the items. Amendments to the protocol should be tracked and dated. The SPIRIT checklist is copyrighted by the SPIRIT Group under the Creative Commons "[Attribution-NonCommercial-NoDerivs 3.0 Unported](https://creativecommons.org/licenses/by-nc-nd/3.0/)" license.
