# Supplementary material for: Physiotherapy exercise rehabilitation with tailored exercise adherence support for people with osteoporosis and vertebral fractures: protocol for a randomised controlled trial – the OsteoPorosis Tailored exercise adherence INtervention (OPTIN) study
Source: PubMed Central journal article supplement — BMJ Open. 2022 Sep 16;12(9):e064637. doi: 10.1136/bmjopen-2022-064637 (PMC9486291; doi:10.1136/bmjopen-2022-064637), 2022-09-16
Supplement: bmjopen-2022-064637.reviewer_comments.pdf [file bmjopen-2022-064637.reviewer_comments.pdf]

## PEER REVIEW HISTORY

BMJ Open publishes all reviews undertaken for accepted manuscripts. Reviewers are asked to complete a checklist review form (<http://bmjopen.bmj.com/site/about/resources/checklist.pdf>) and are provided with free text boxes to elaborate on their assessment. These free text comments are reproduced below.

## ARTICLE DETAILS

|                            |                                                                                                                                                                                                                                                            |
|----------------------------|------------------------------------------------------------------------------------------------------------------------------------------------------------------------------------------------------------------------------------------------------------|
| <b>TITLE (PROVISIONAL)</b> | Physiotherapy exercise rehabilitation with tailored exercise adherence support for people with osteoporosis and vertebral fractures: Protocol for a randomised controlled trial – the Osteoporosis Tailored exercise adherence intervention (OPTIN) study. |
| <b>AUTHORS</b>             | Barker, Karen L.; Room, Jonathan; Knight, Ruth; Hannink, Erin; Newman, Meredith                                                                                                                                                                            |

This article was not externally reviewed at BMJ Open. Protocols that have been independently assessed prior to submission to BMJ Open are usually fast-tracked to publication on the grounds that further substantial changes will not be possible. This independent assessment will usually be external, independent review for both a substantial grant award from a non-commercial or government funder and ethics approval.
