# Supplementary material for: Physiotherapy exercise rehabilitation with tailored exercise adherence support for people with osteoporosis and vertebral fractures: protocol for a randomised controlled trial – the OsteoPorosis Tailored exercise adherence INtervention (OPTIN) study
Source: PubMed Central journal article supplement — BMJ Open. 2022 Sep 16;12(9):e064637. doi: 10.1136/bmjopen-2022-064637 (PMC9486291; doi:10.1136/bmjopen-2022-064637), 2022-09-16
Supplement: bmjopen-2022-064637supp001.pdf [file bmjopen-2022-064637supp001.pdf]

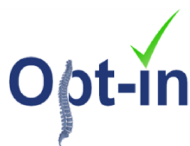

TRUST LOGO (if applicable), or a placeholder, 'local logo/letterhead'

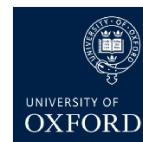

**Chief Investigator: Professor Karen Barker**

**Principal Investigator: <<PI name here>>**  
 <<Local hospital address here>>

Study code                      Site code                      Participant number

|       |  |  |  |  |  |
|-------|--|--|--|--|--|
| O P T |  |  |  |  |  |
|-------|--|--|--|--|--|

**CONSENT FORM – Main study**

**Osteoporosis Tailored exercise adherence INtervention (Opt-In)**

*If you agree,  
please initial each  
box*

|                                                                                                                                                                                                                                                                                                                                                 |  |
|-------------------------------------------------------------------------------------------------------------------------------------------------------------------------------------------------------------------------------------------------------------------------------------------------------------------------------------------------|--|
| 1. I confirm that I have read the information sheet dated..... (version.....) for this study. I have had the opportunity to consider the information, ask questions and have had these answered satisfactorily.                                                                                                                                 |  |
| 2. I understand that my participation is voluntary and that I am free to withdraw at any time without giving any reason, without my medical care or legal rights being affected.                                                                                                                                                                |  |
| 3. I understand that relevant sections of my medical notes and data collected during the study may be looked at by individuals from University of Oxford, from regulatory authorities and from the NHS Trust(s), where it is relevant to my taking part in this research. I give permission for these individuals to have access to my records. |  |
| 4. I agree to my General Practitioner being informed of my participation in the study.                                                                                                                                                                                                                                                          |  |
| 5. I understand I may be contacted for the option to participate in qualitative interview or focus group related to the study.                                                                                                                                                                                                                  |  |
| 6. I agree to take part in this study.                                                                                                                                                                                                                                                                                                          |  |

\_\_\_\_\_  
*Name of Participant                      Date                      Signature*

\_\_\_\_\_  
*Name of Person taking                      Date                      Signature*  
 Consent

*\*1 copy for participant; 1 copy for local researcher site file; 1 (original) to be kept in medical notes (if participant is a patient).*

|                                                                                                                                           |                                                                                     |
|-------------------------------------------------------------------------------------------------------------------------------------------|-------------------------------------------------------------------------------------|
| Consent Form – Main study<br>Osteoporosis Tailored exercise adherence INtervention (Opt-In)<br>Chief Investigator: Professor Karen Barker | v1.0 / 21MAY2021<br>IRAS Project number: 287716<br>REC Reference number: 21/WS/0071 |
|-------------------------------------------------------------------------------------------------------------------------------------------|-------------------------------------------------------------------------------------|
